# Supplementary material
Source: PubMed Central journal article supplement (PMC2921539)
Supplement: NIHMS207259-supplement-01.pdf [file NIHMS207259-supplement-01.pdf]

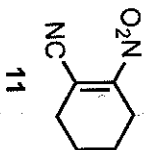

\* kimw12 AS1\_3\_241 (1 1) CDCI3 24:00 October\_16\_2008\_23:20 DRX 500MHz zg30 1H \*

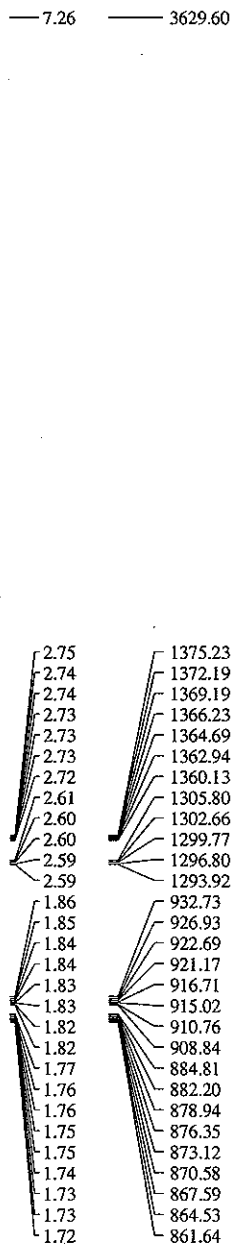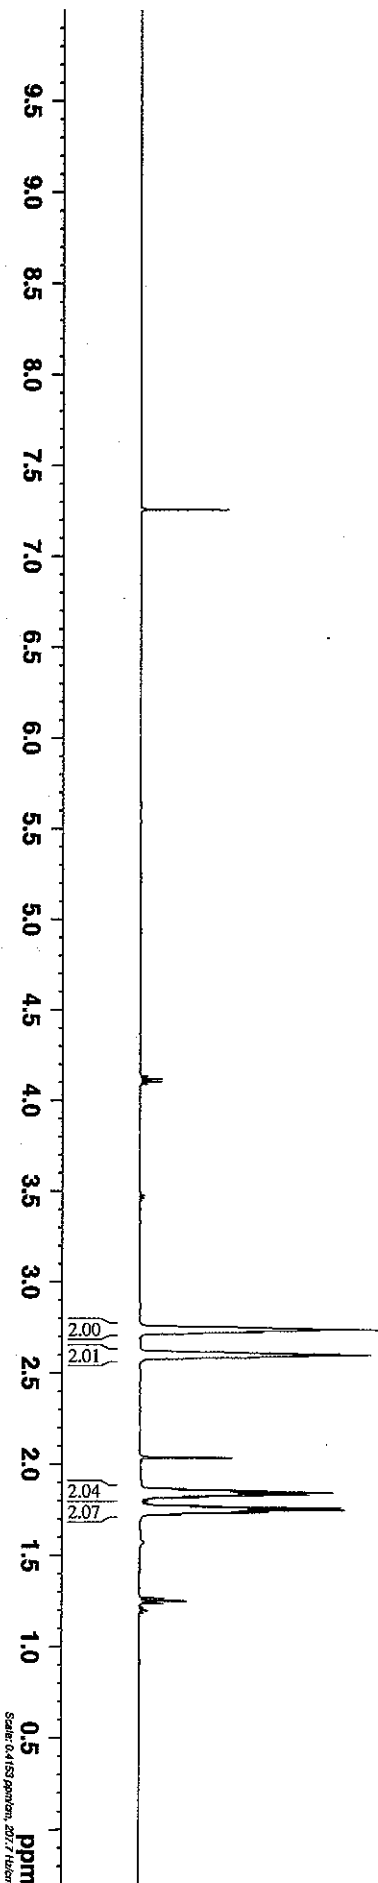

Carbon . \* kimw12 AS1\_3\_251\_ S.M.\_13C (1) MeOD 24.0C October\_24,2008\_14:33 DRX 500MHz zgpg30 13C; 1H O2=4.000 \*

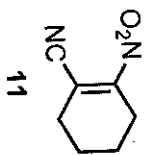

| Chemical Shift (ppm) | Assignment |
|----------------------|------------|
| 19861.72             | 157.94     |
| 14476.15             | 115.11     |
| 14357.99             | 114.17     |
| 9712.55              | 77.23      |
| 9680.55              | 76.98      |
| 9648.56              | 76.72      |
| 3694.62              | 29.38      |
| 3226.78              | 25.66      |
| 2608.28              | 20.74      |
| 2547.40              | 20.26      |

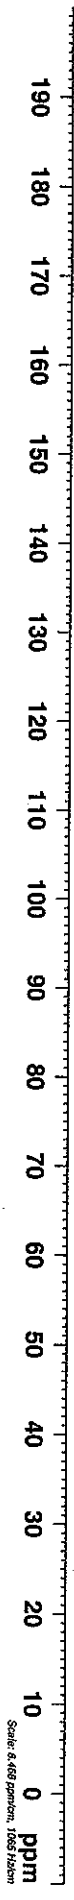

Scale: 6.669 ppm/cm, 1065 Hz/cm

\* kimw12 AS1\_3\_251\_30T040 (10 1) CDCl3 24.0C October\_24\_2008\_09:36 Bruker AVII+ 600MHz RRL1326: z930 : 1H 7.500 ppm \*

9.6138  
 7.2603  
 7.2542

5.1405  
 5.1327  
 4.9180  
 4.0431  
 4.0350  
 3.6668  
 3.4408  
 3.3248  
 3.2941  
 3.2777  
 3.2735  
 3.2256  
 3.2040  
 2.6767  
 2.6104  
 2.5539  
 2.5463  
 2.5373  
 2.5252  
 2.4549  
 2.4444  
 2.3680  
 2.3620  
 2.3492  
 2.3434  
 2.3378  
 1.9248  
 1.8891  
 1.8814  
 1.8760  
 1.8688  
 1.8578  
 1.8510  
 1.8454  
 1.8170  
 1.8112  
 1.8033  
 1.7941  
 1.7786  
 1.7736  
 1.7437  
 1.7374  
 1.7303  
 1.7211  
 1.7137  
 1.7072  
 1.6592  
 1.6530  
 1.6465  
 1.6359  
 1.6293  
 1.6240  
 1.6074  
 1.5874  
 1.5613  
 1.2505  
 1.0427

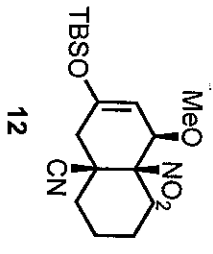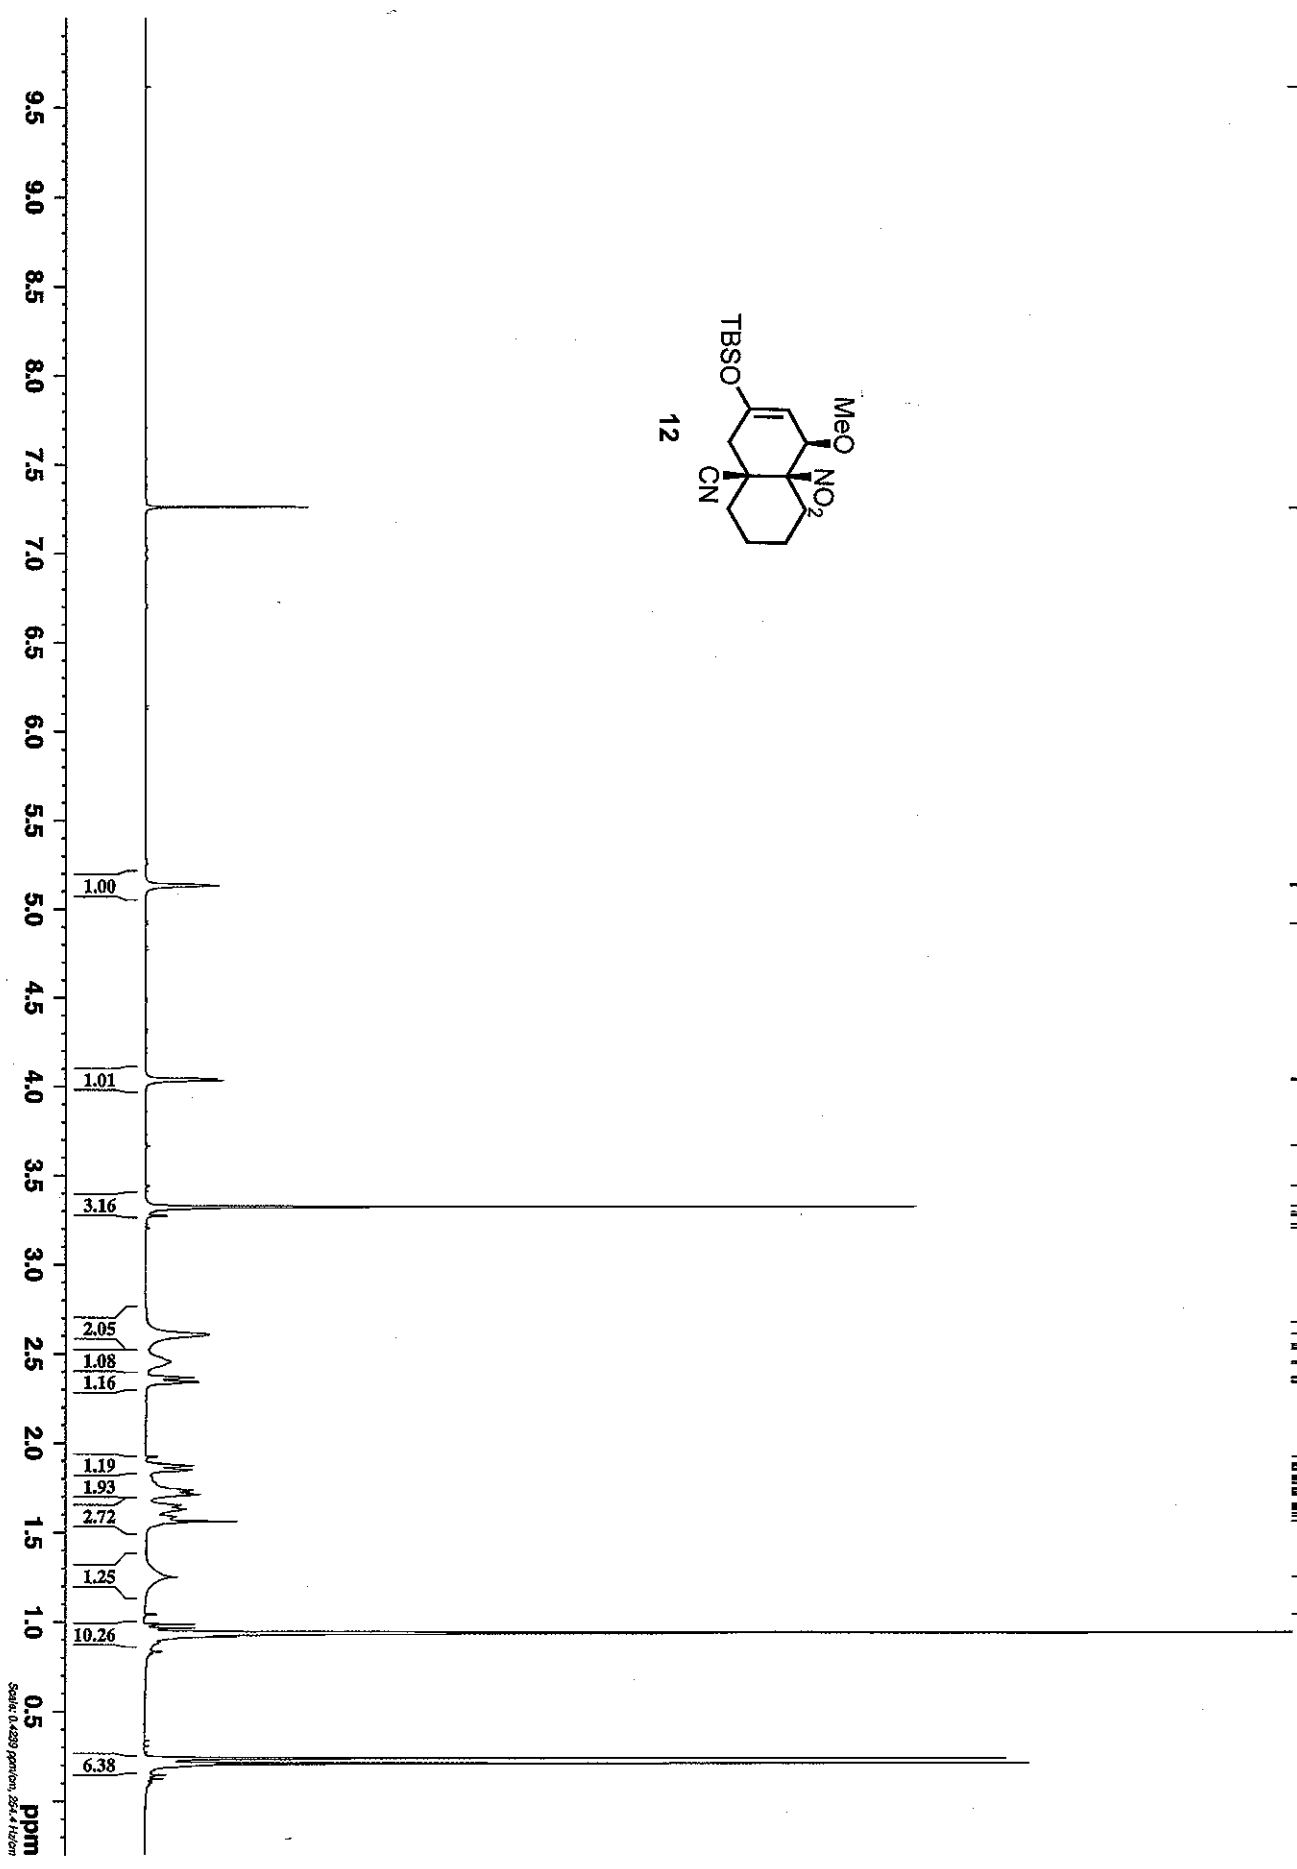

Scale: 0.4899 ppm/cm, 256 x 1024

\* kimw12 ASI\_3\_251\_14 (10 1) CDCI3 24.0C October\_24,2008\_20:52 Bruker AVII+ 600MHz RRL1326: zg30 : 1H 7.500 ppm \*

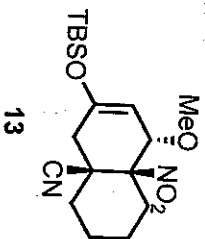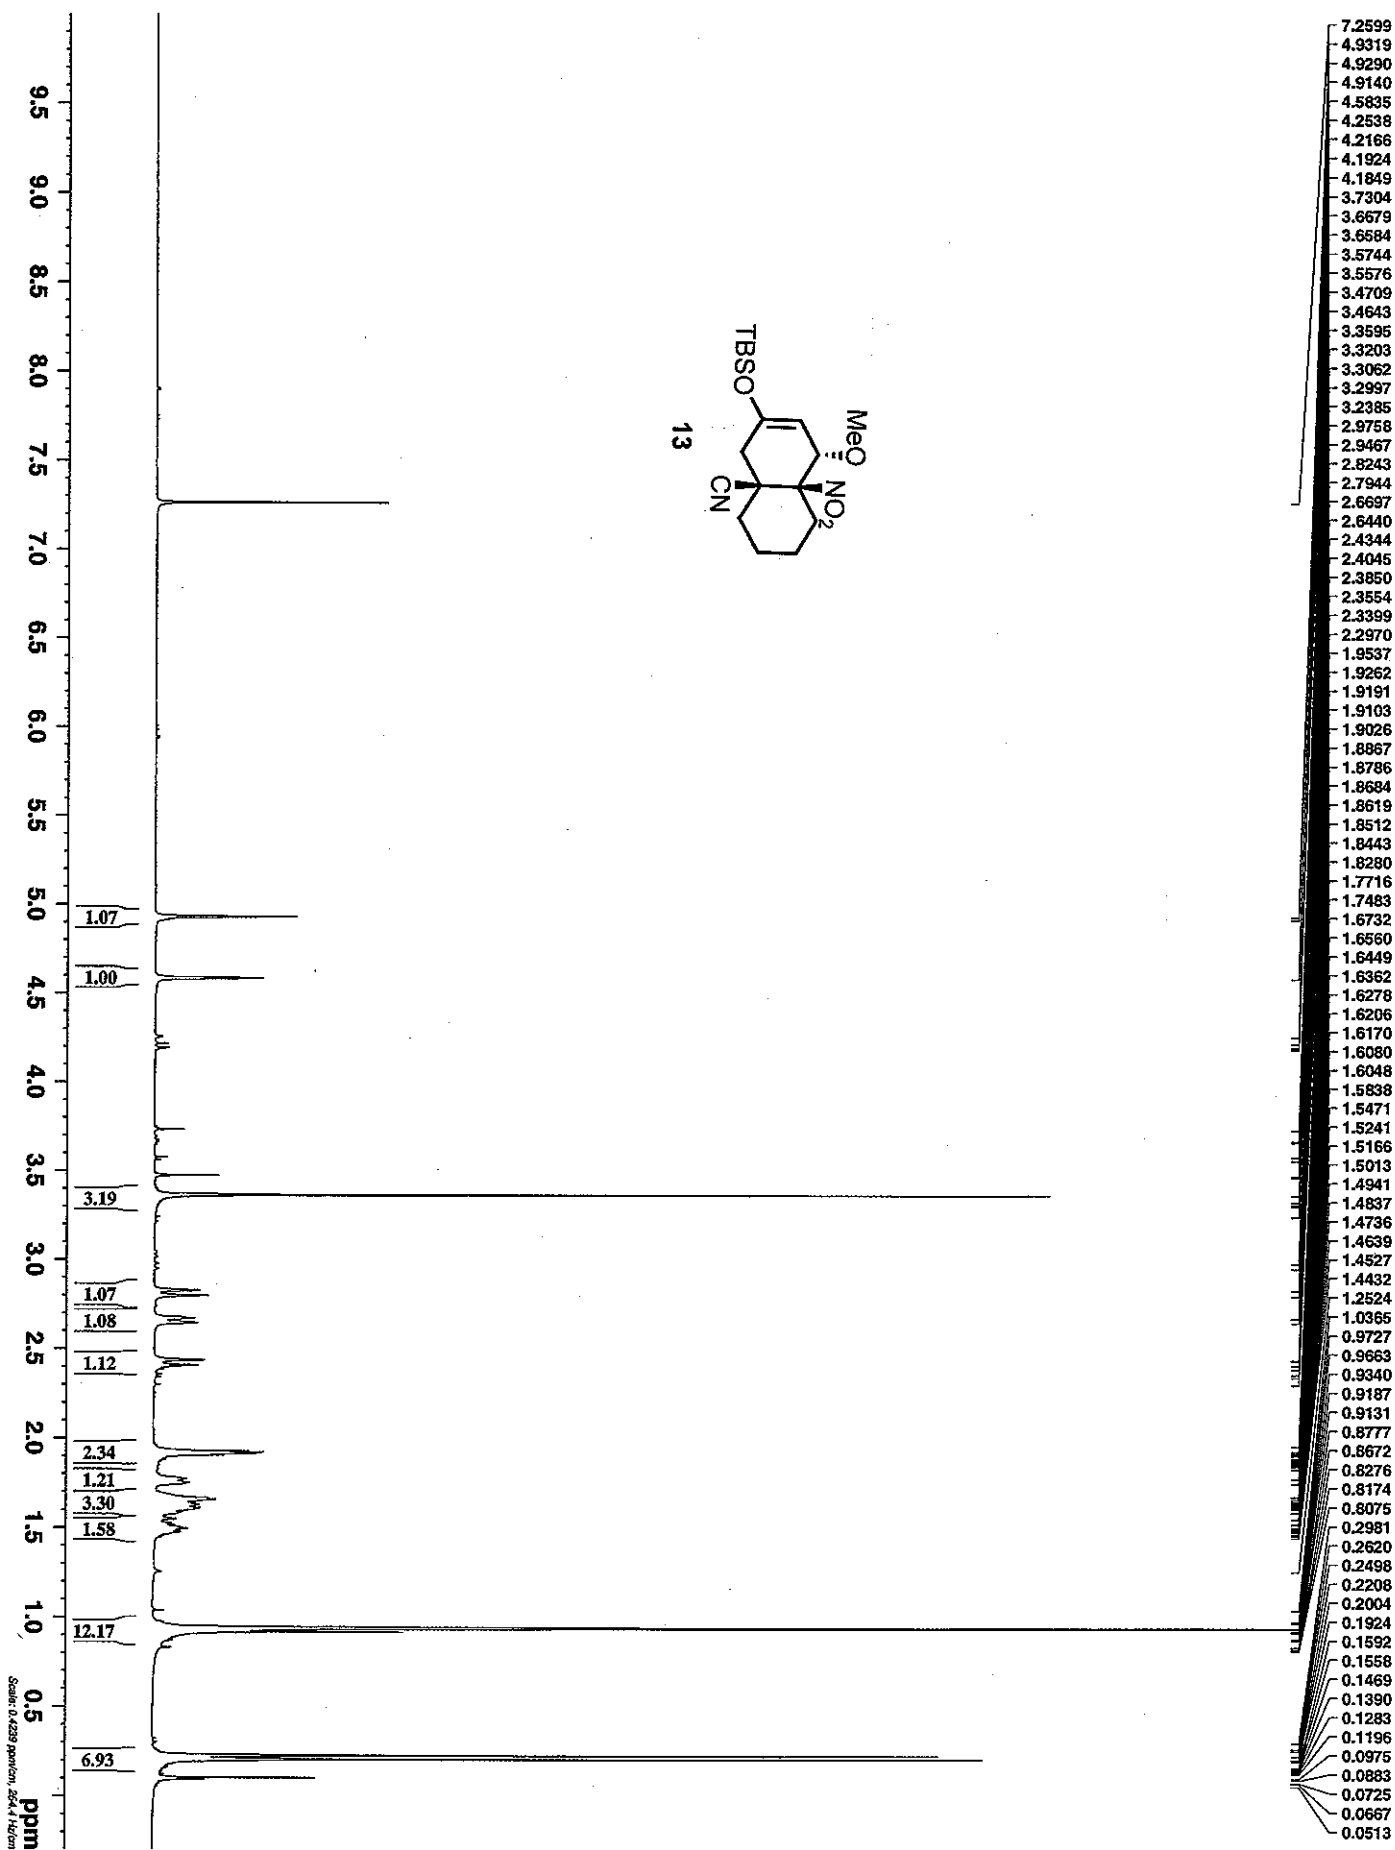

Carbon \* Kimw12 AS1\_3\_251\_14\_13C (1) CDCl3 24.0C October\_23,2008\_23:24 DRX 500MHz zgpg30 13C; 1H O2=4.000 \*

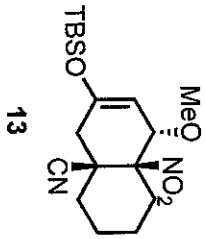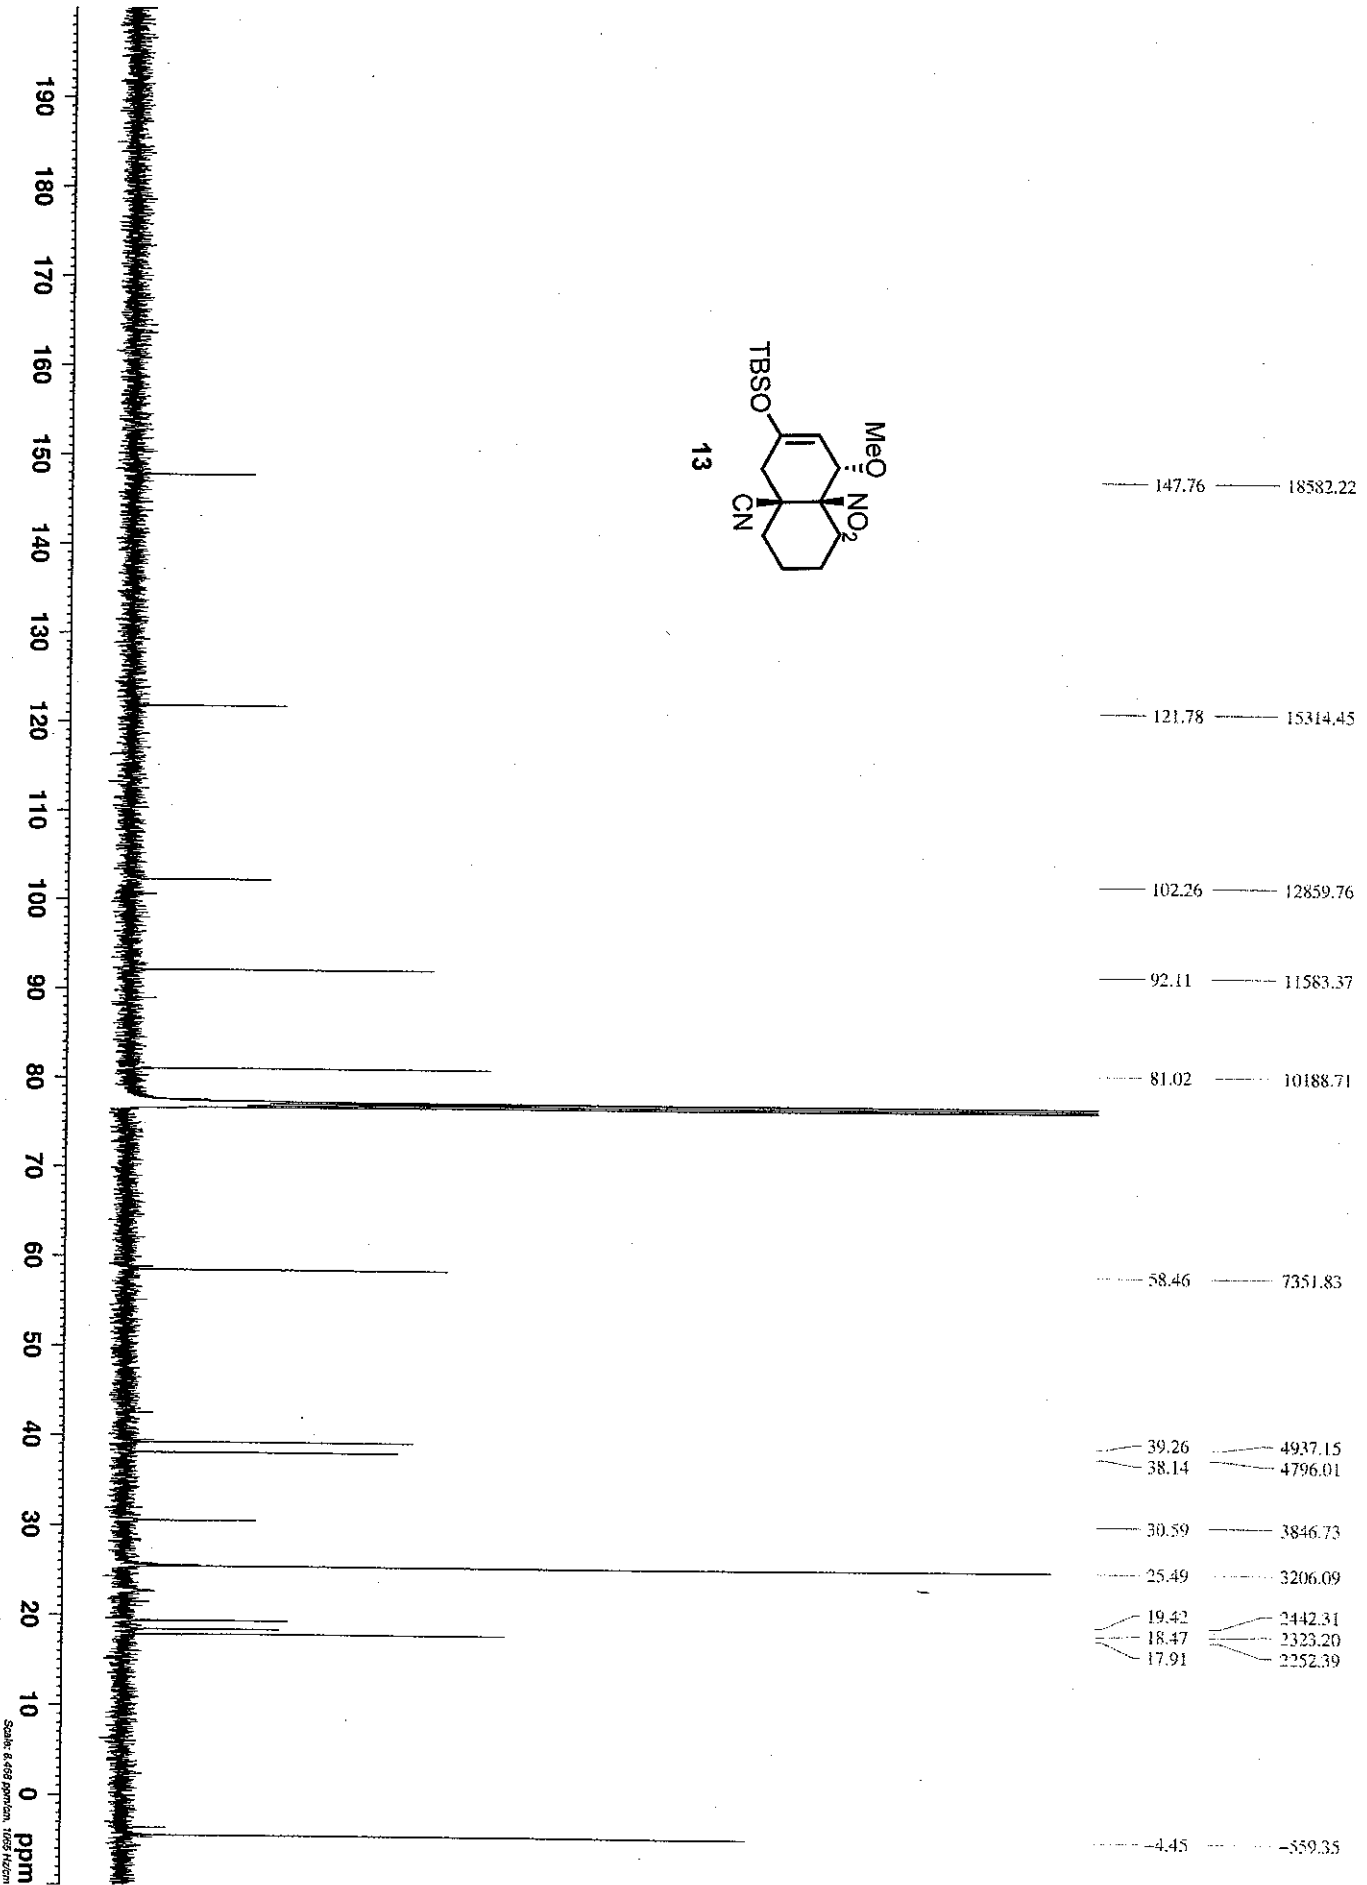

\* Kimw12 AS1\_3\_269\_MAJOR (10 1) CDCI3 24.0C November\_07\_2008\_20:13 Bruker AVII+ 600MHz RRL1326: zg30 : 1H 7.500 ppm \*

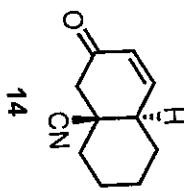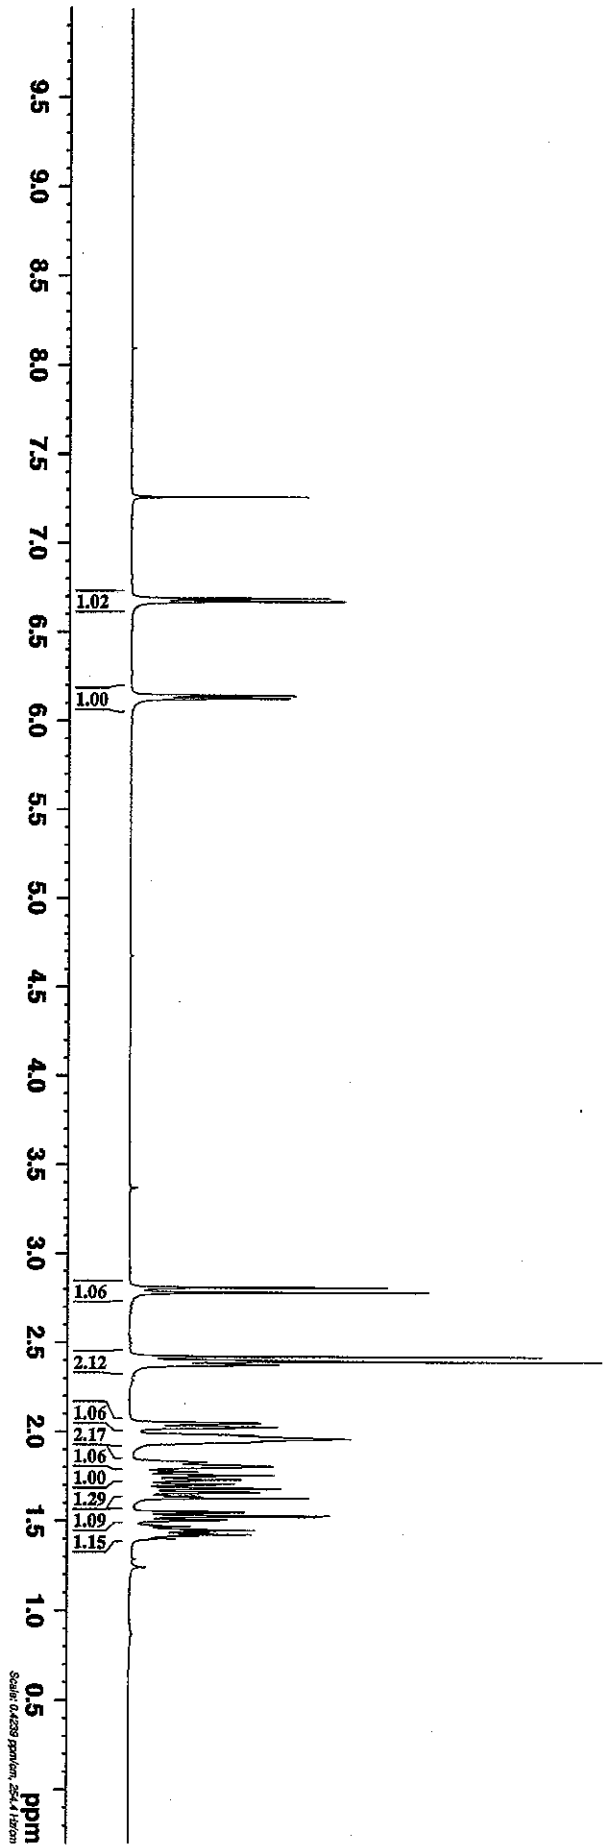

- 7.2600
- 6.6877
- 6.6852
- 6.6709
- 6.6684
- 6.1447
- 6.1410
- 6.1402
- 6.1279
- 6.1243
- 2.8088
- 2.7810
- 2.4205
- 2.4029
- 2.3978
- 2.3928
- 2.3815
- 2.3763
- 2.3730
- 2.3680
- 2.0470
- 2.0248
- 1.9826
- 1.9774
- 1.9705
- 1.9597
- 1.9547
- 1.9477
- 1.9431
- 1.9415
- 1.8346
- 1.8300
- 1.8279
- 1.8258
- 1.8234
- 1.8179
- 1.8156
- 1.8109
- 1.8063
- 1.8042
- 1.7997
- 1.7815
- 1.7752
- 1.7688
- 1.7598
- 1.7535
- 1.7473
- 1.7376
- 1.7362
- 1.7315
- 1.7302
- 1.7254
- 1.7142
- 1.7080
- 1.7019
- 1.6859
- 1.6801
- 1.6639
- 1.6579
- 1.6420
- 1.6350
- 1.6290

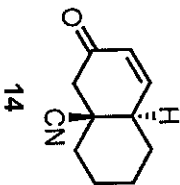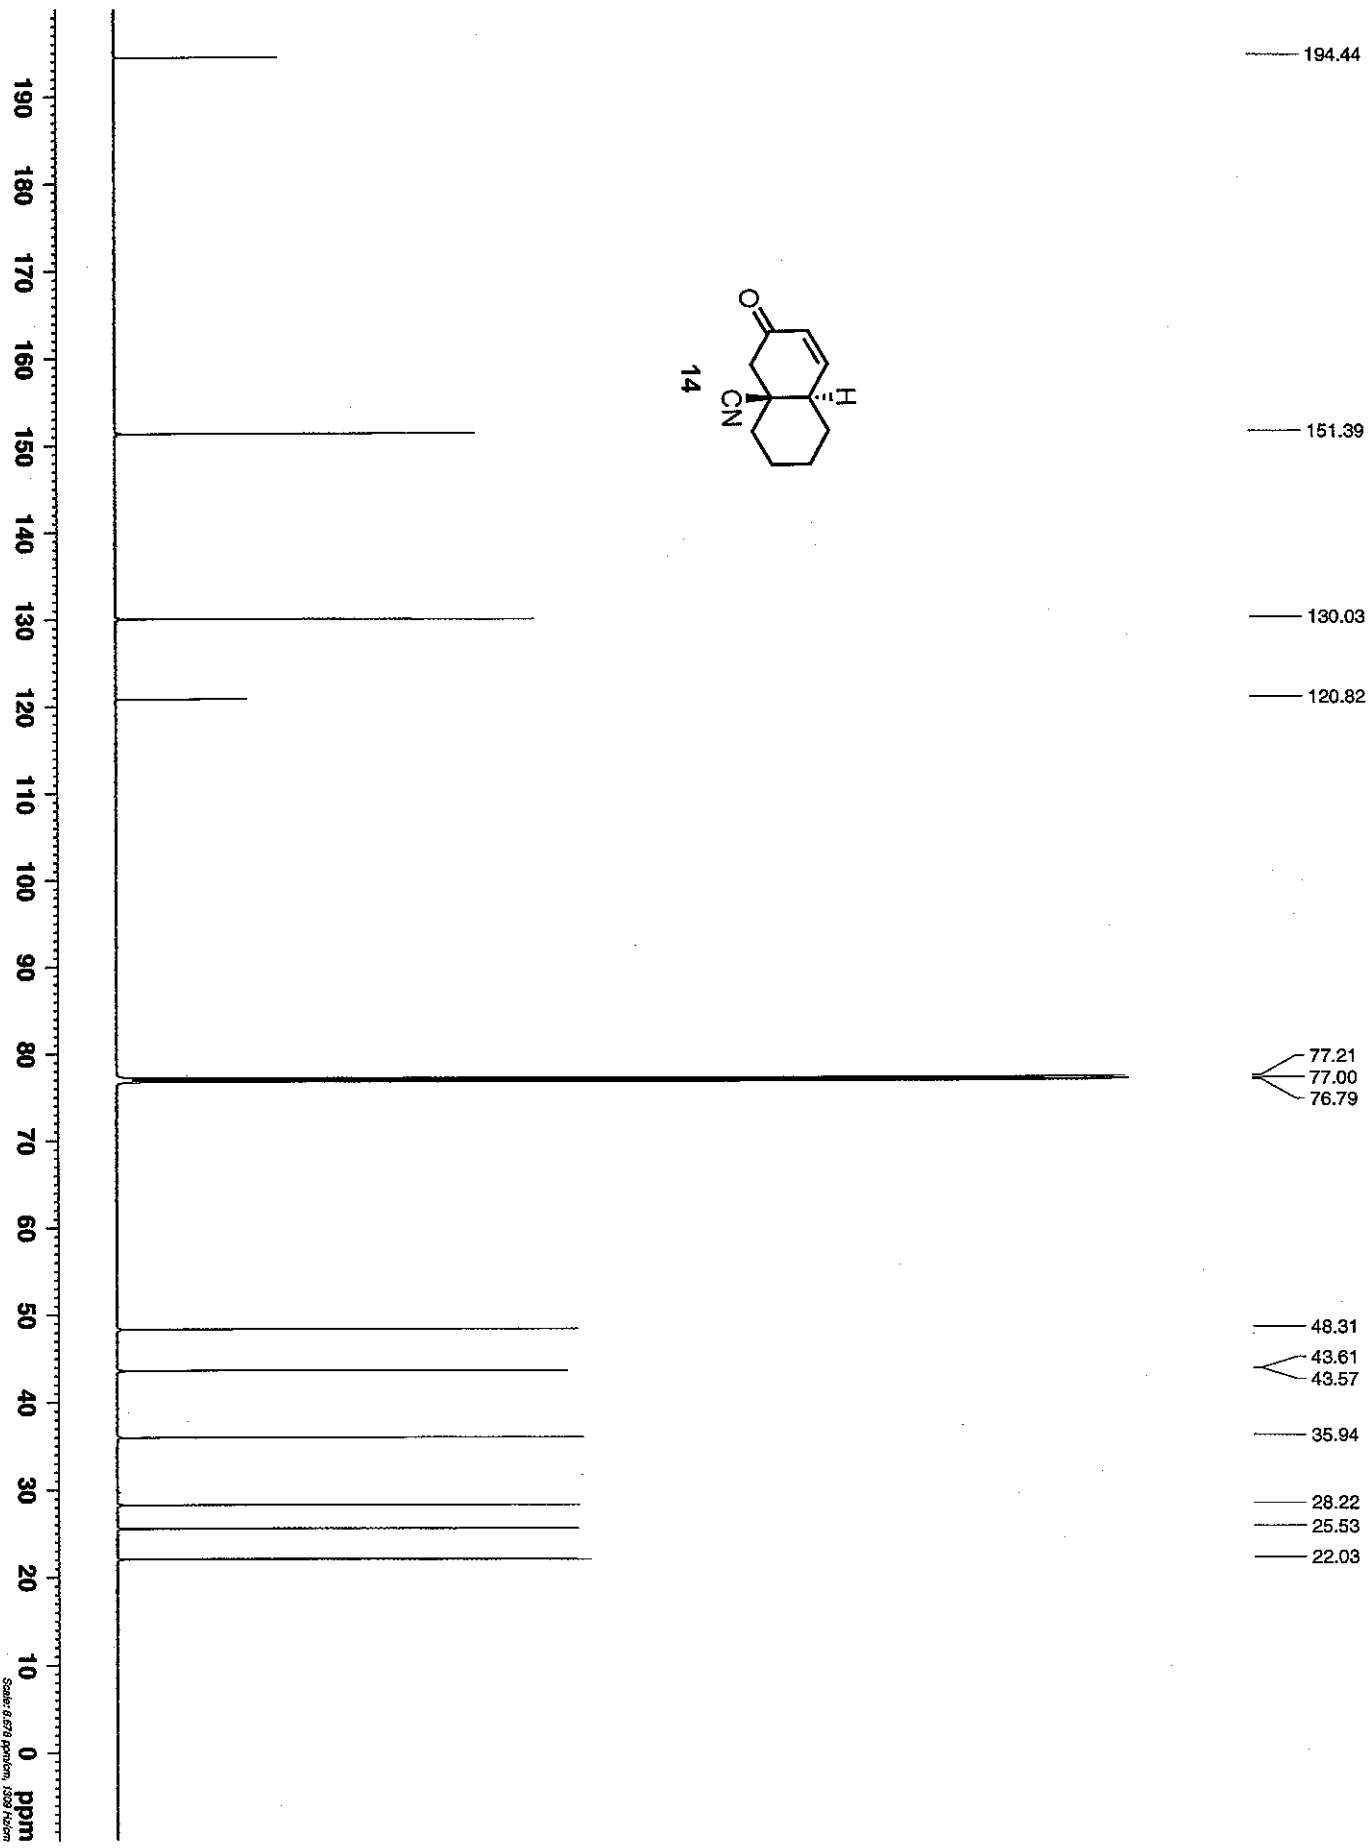

Scale: 6.679 ppp/cm, 1000 Hz/cm

\* Kimw12 AS1\_3.276 (1 1) CDCl3 24.0C November\_12.2008\_21:18 Bruker AVII+ 600MHz RRL1326: zpp930 : 13C 110.000 ppm; 1H 4.500 ppm \*

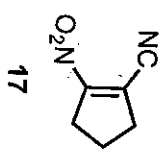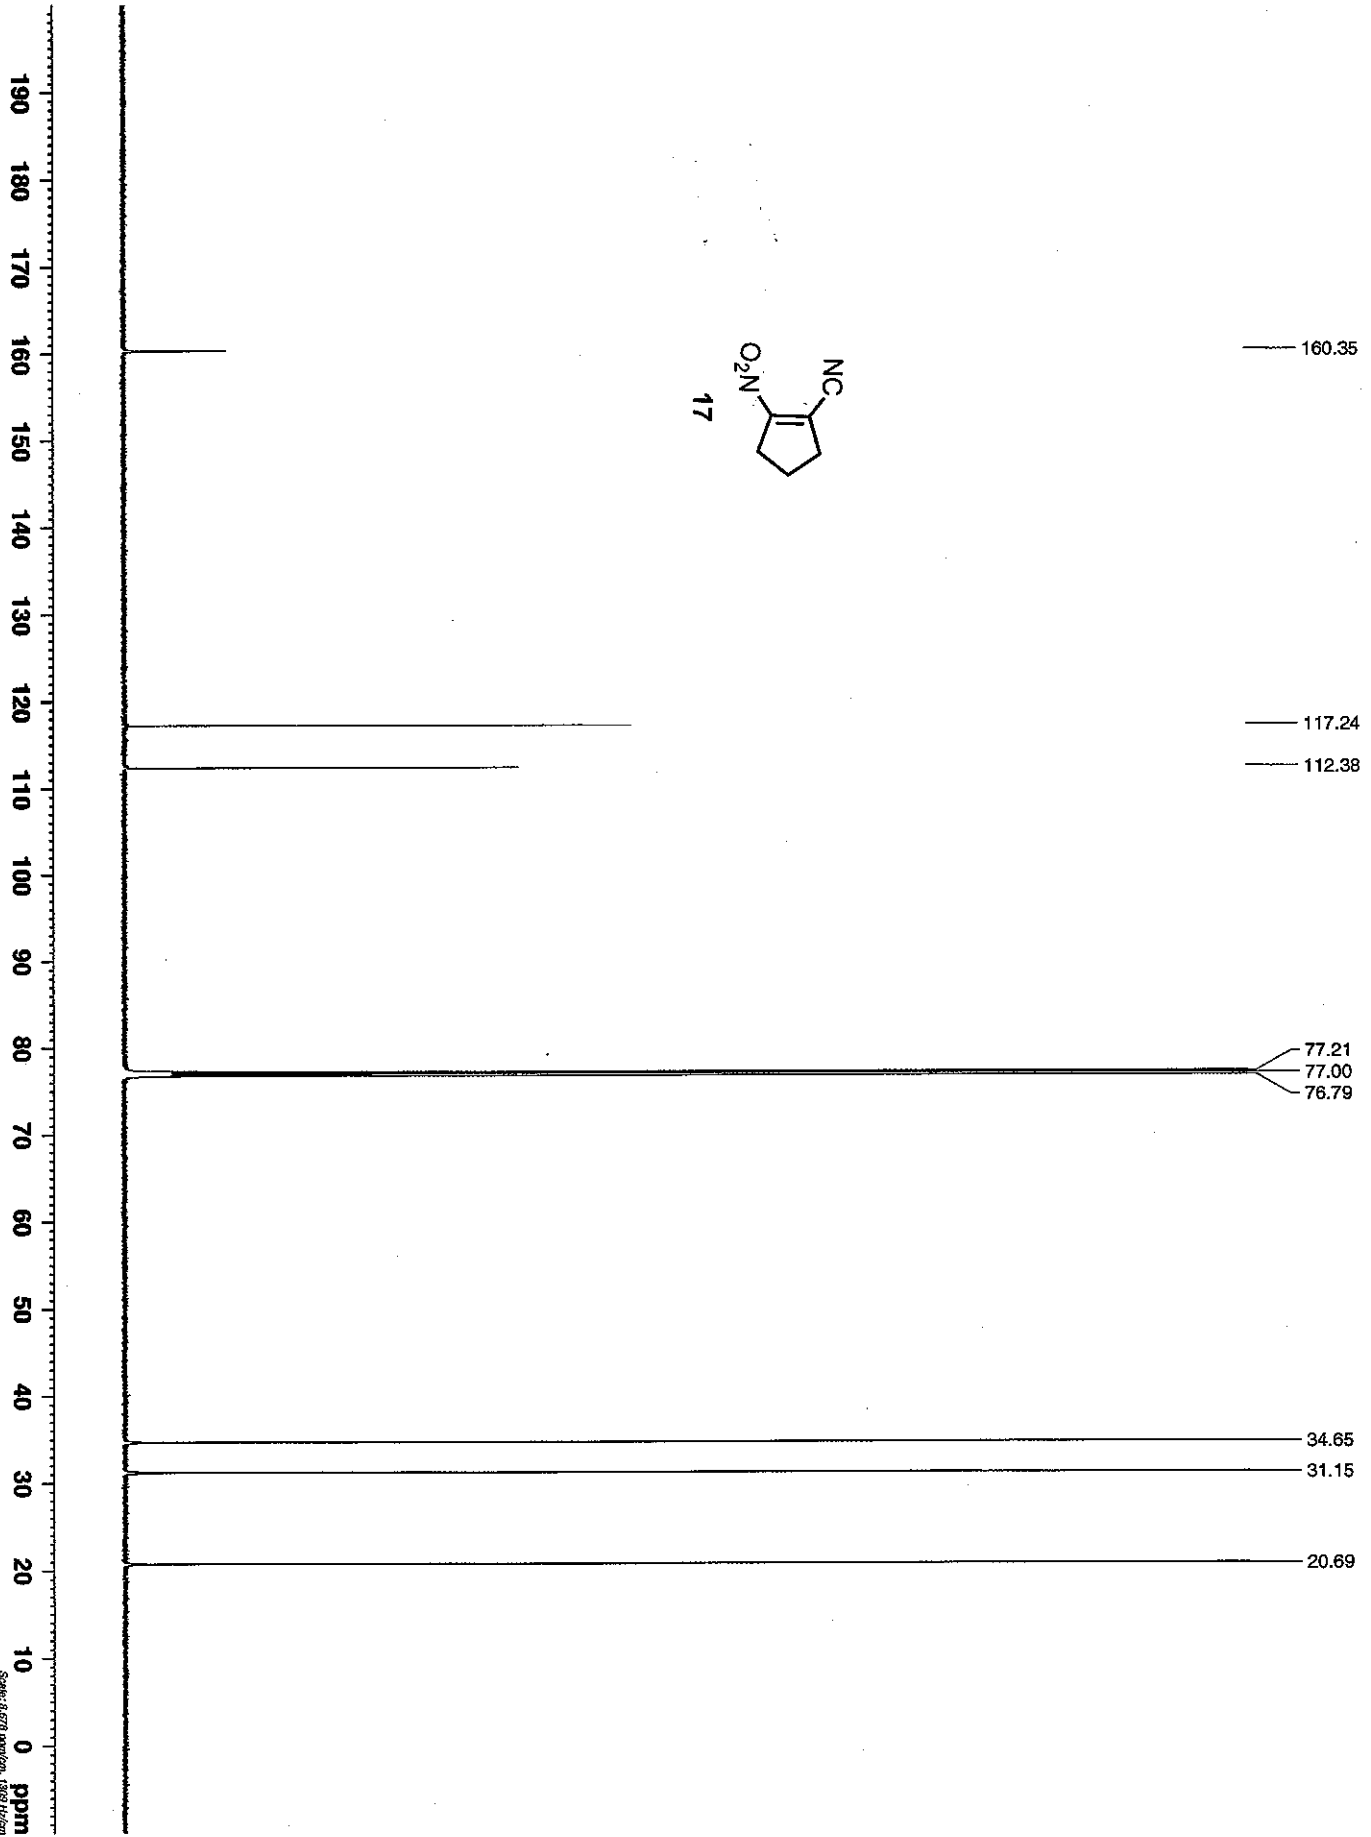

Scale: 0.578 ppm/cm, 1329 Hz/cm



\* kimw12 AS1\_3\_275 (10 1) CDCI3 24.0C November\_12,2008\_21:00 Bruker AVII+ 600MHz RRL1326: zg30 : 1H 7.500 ppm \*

7.4314  
7.2799  
7.2596  
7.0827

3.1930  
3.1877  
3.1797  
3.1745  
3.1695  
3.1614  
3.1561  
3.1108  
3.0808  
3.0758  
3.0702  
3.0679  
3.0626  
3.0575  
3.0547  
3.0494  
3.0441  
2.9580  
2.9506  
2.9434  
2.9381  
2.9330  
2.9306  
2.9250  
2.9199  
2.8402  
2.8348  
2.8277  
2.8223  
2.8168  
2.8090  
2.8041  
2.7669  
2.7548  
2.7431  
2.3550  
2.3417  
2.3290  
2.3158  
2.3030  
2.2851  
2.2733  
2.2692  
2.2448  
2.2416  
2.2316  
2.2187  
2.2056  
2.1965  
2.1928  
2.1523  
2.1302  
2.1218  
2.1171  
2.1043  
2.0912  
2.0783

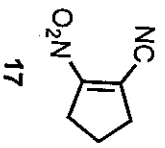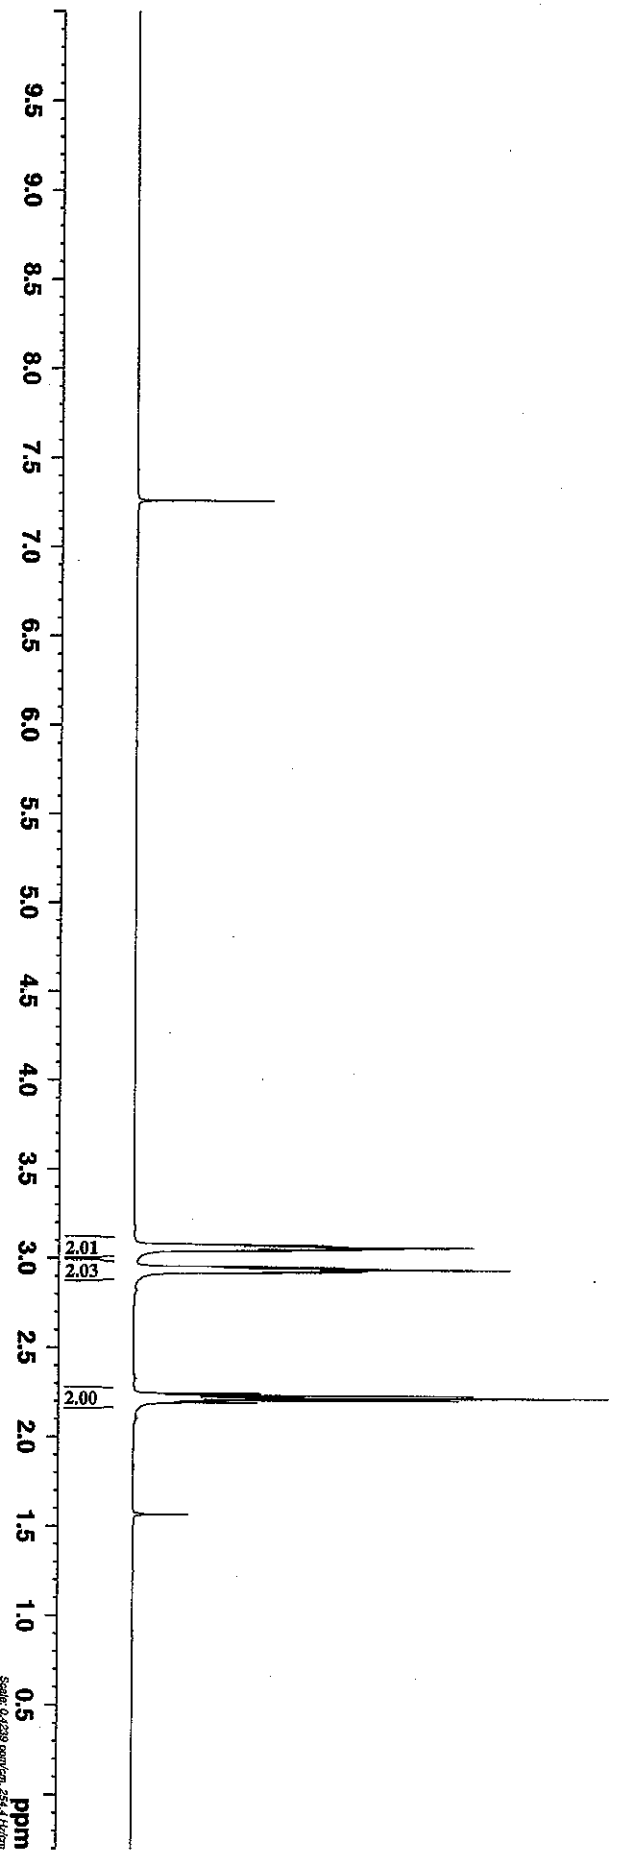

Scale: 0.4239 ppm/cm, 25k, 4 Hz/cm

\* kimw12 AS1\_3\_277\_TOP (10 1) CDC13 24.0C November\_13\_2008\_16:01 Bruker AVII+ 600MHz RRL 1326: zg30 : 1H 7.500 ppm \*

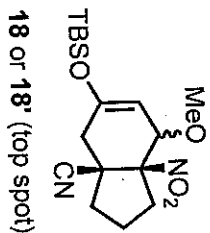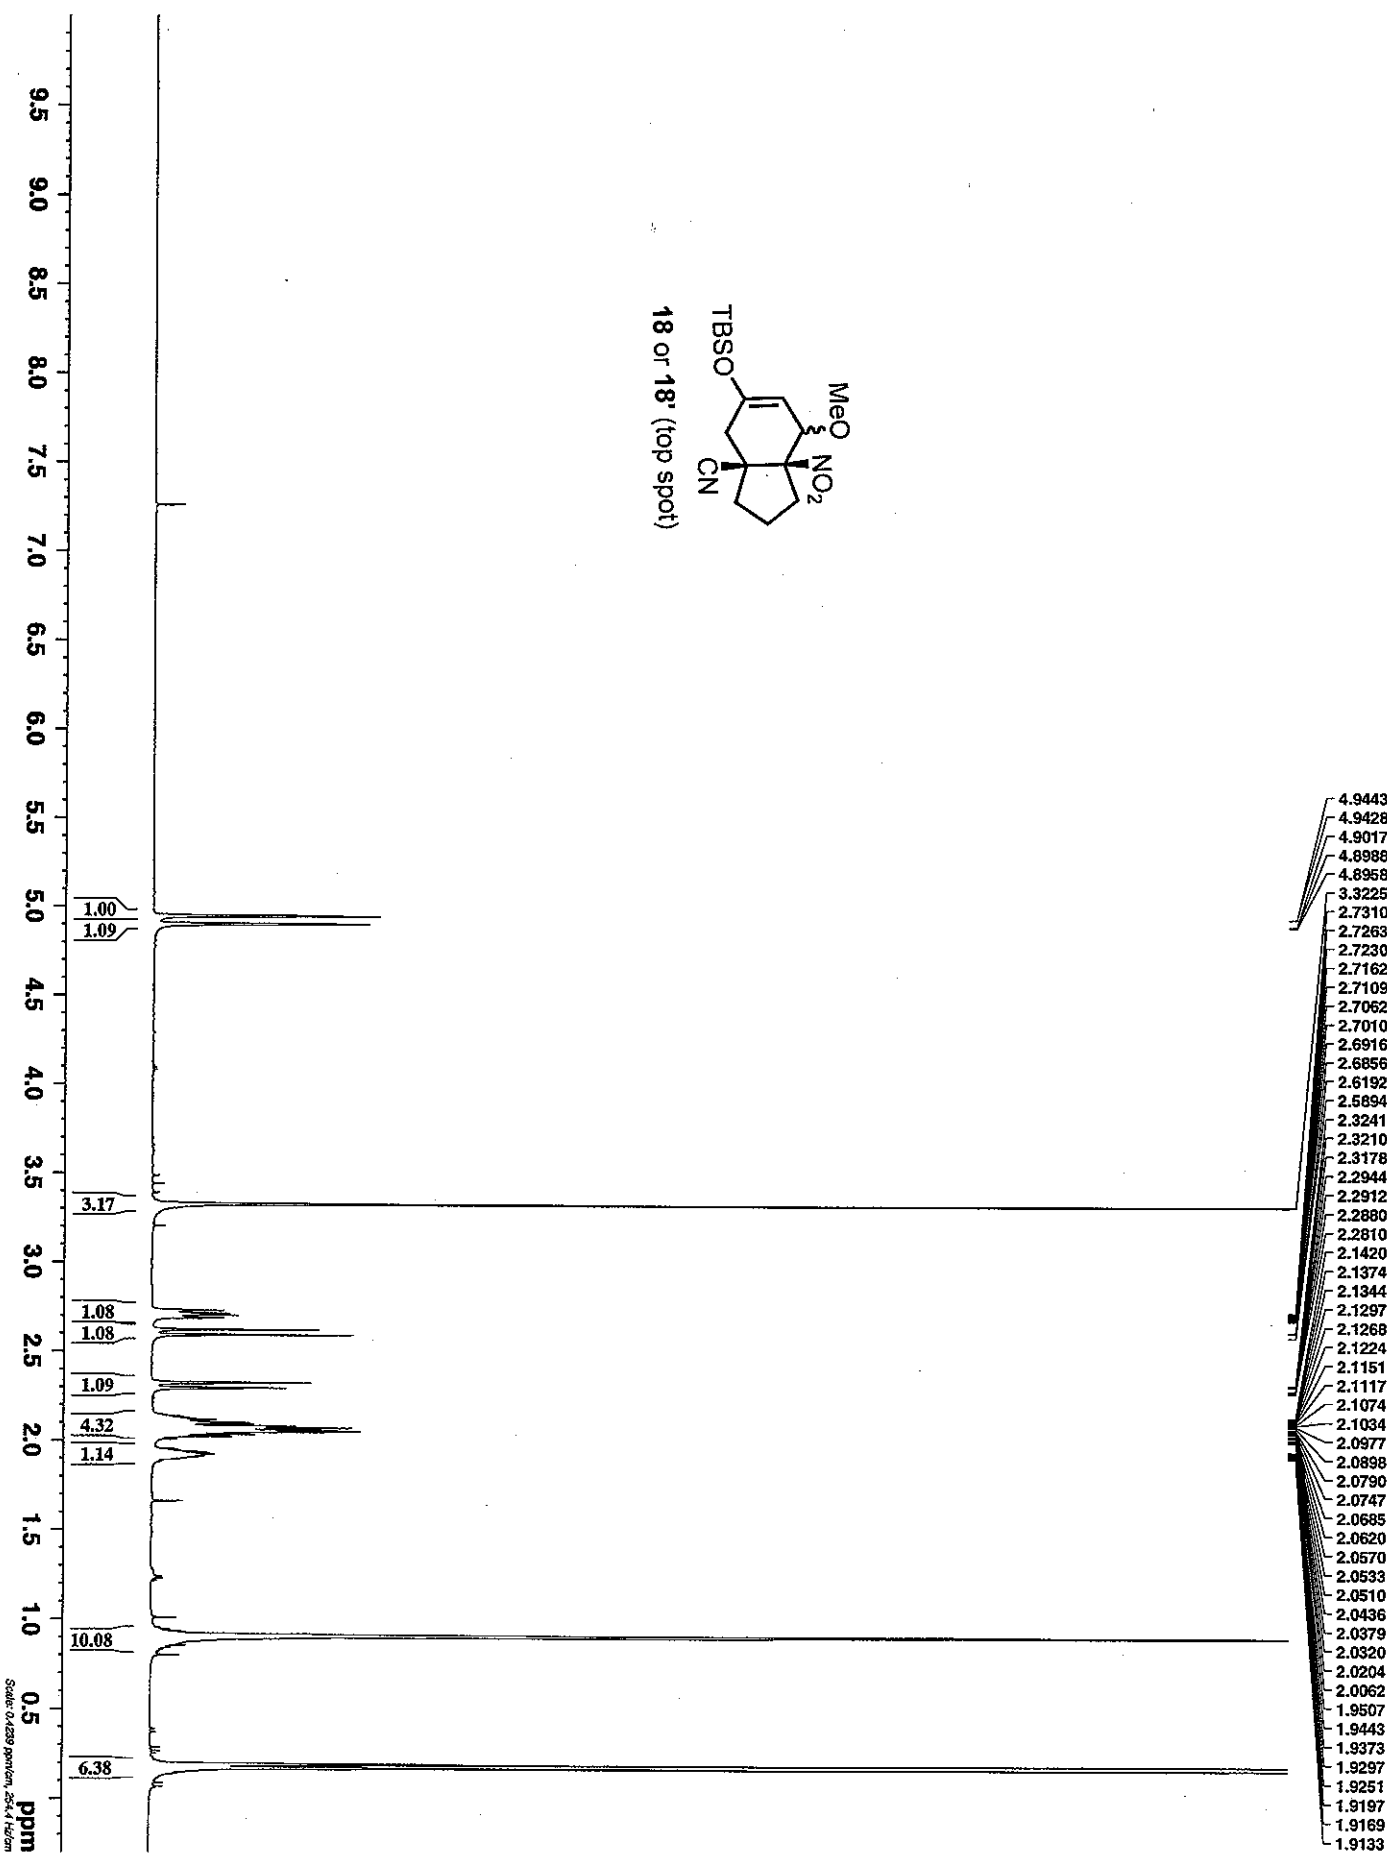

Scale: 0.4289 ppm/cm, 254.4 Hz/cm

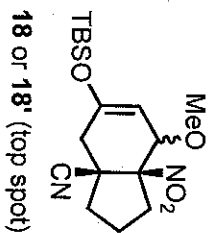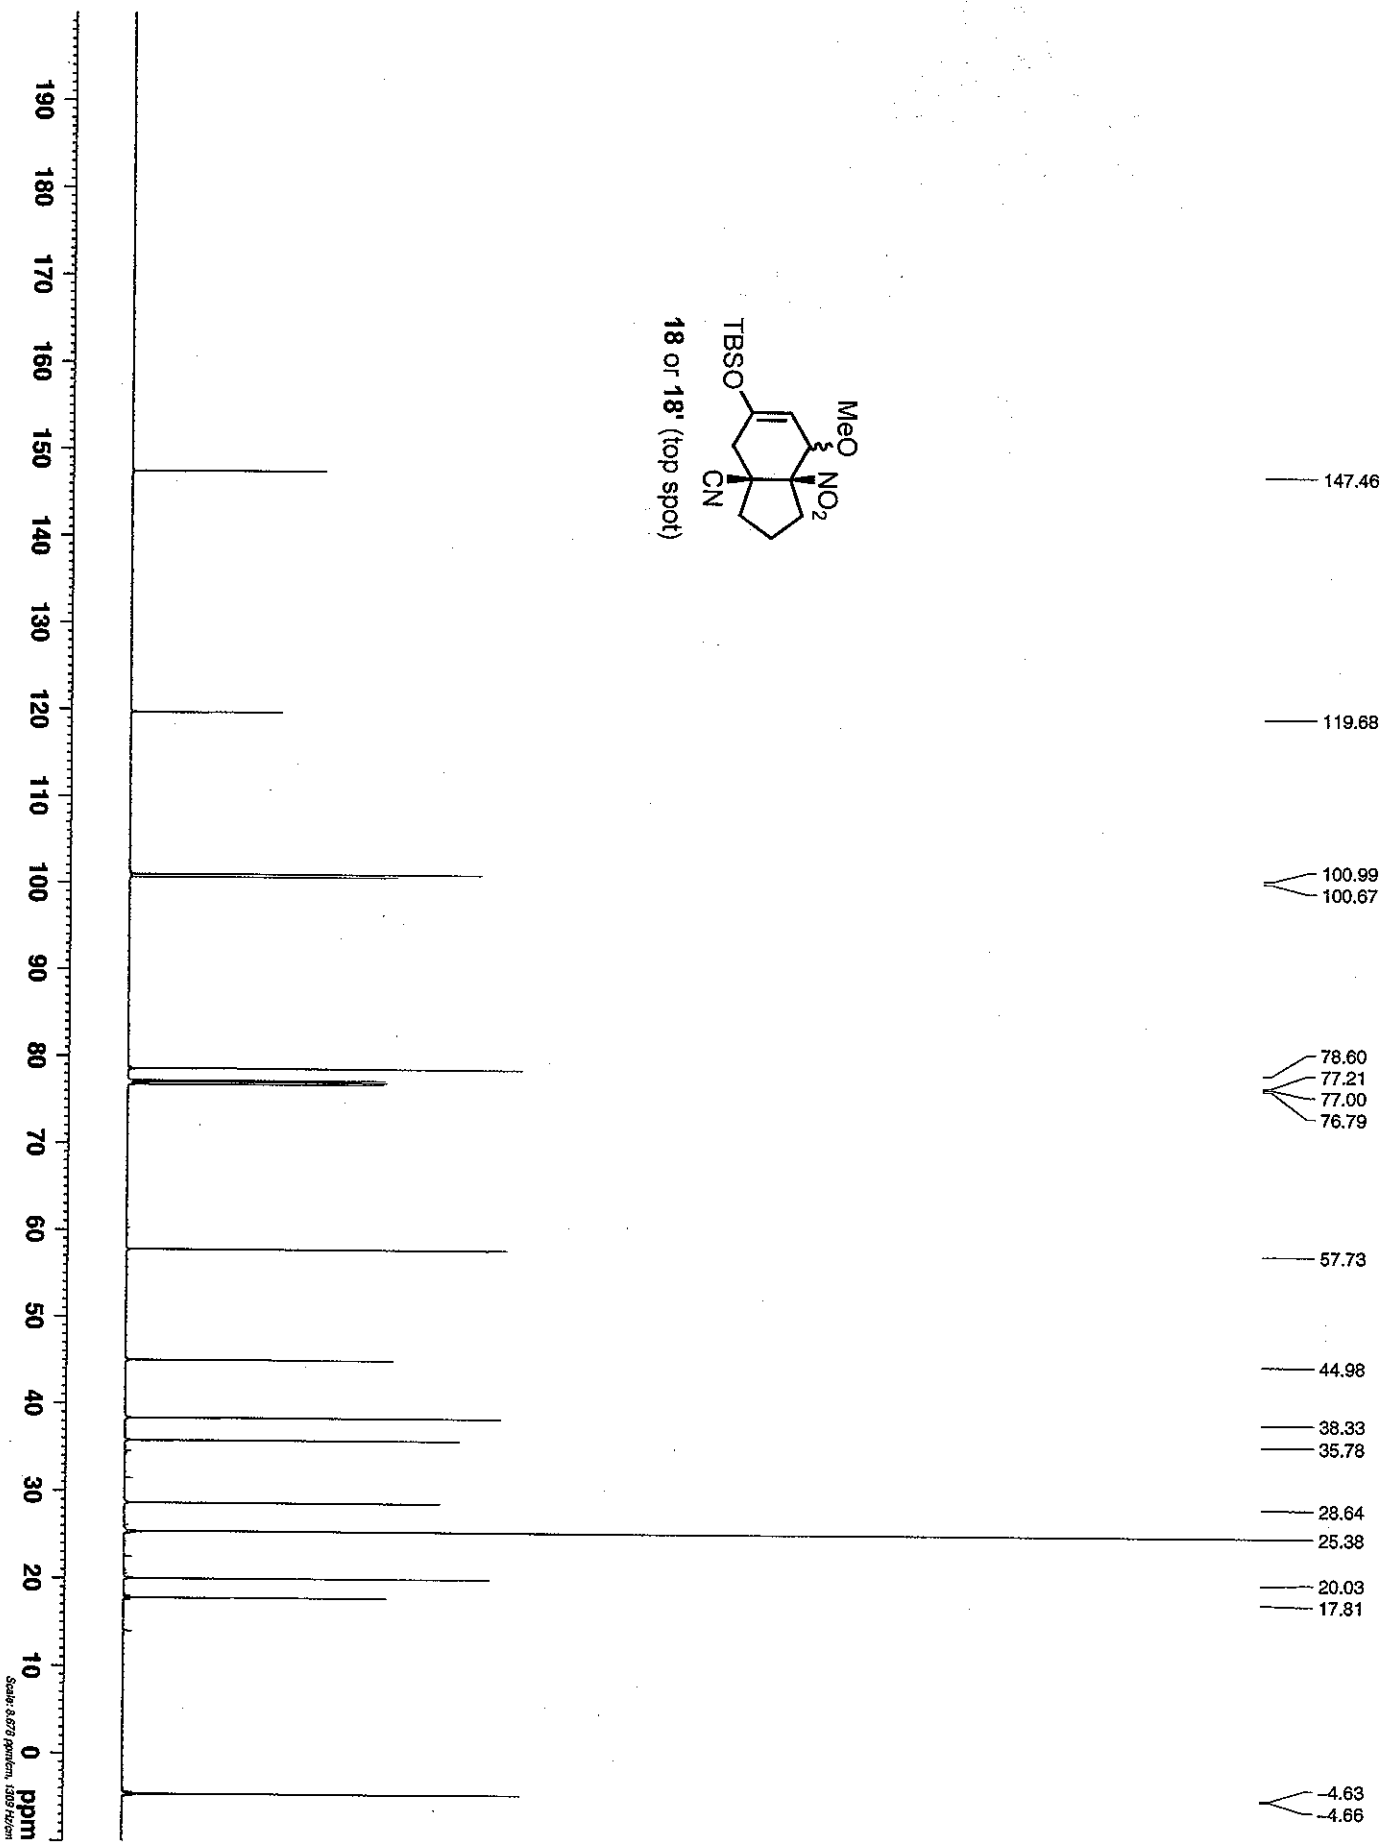

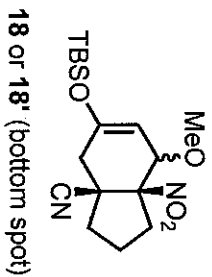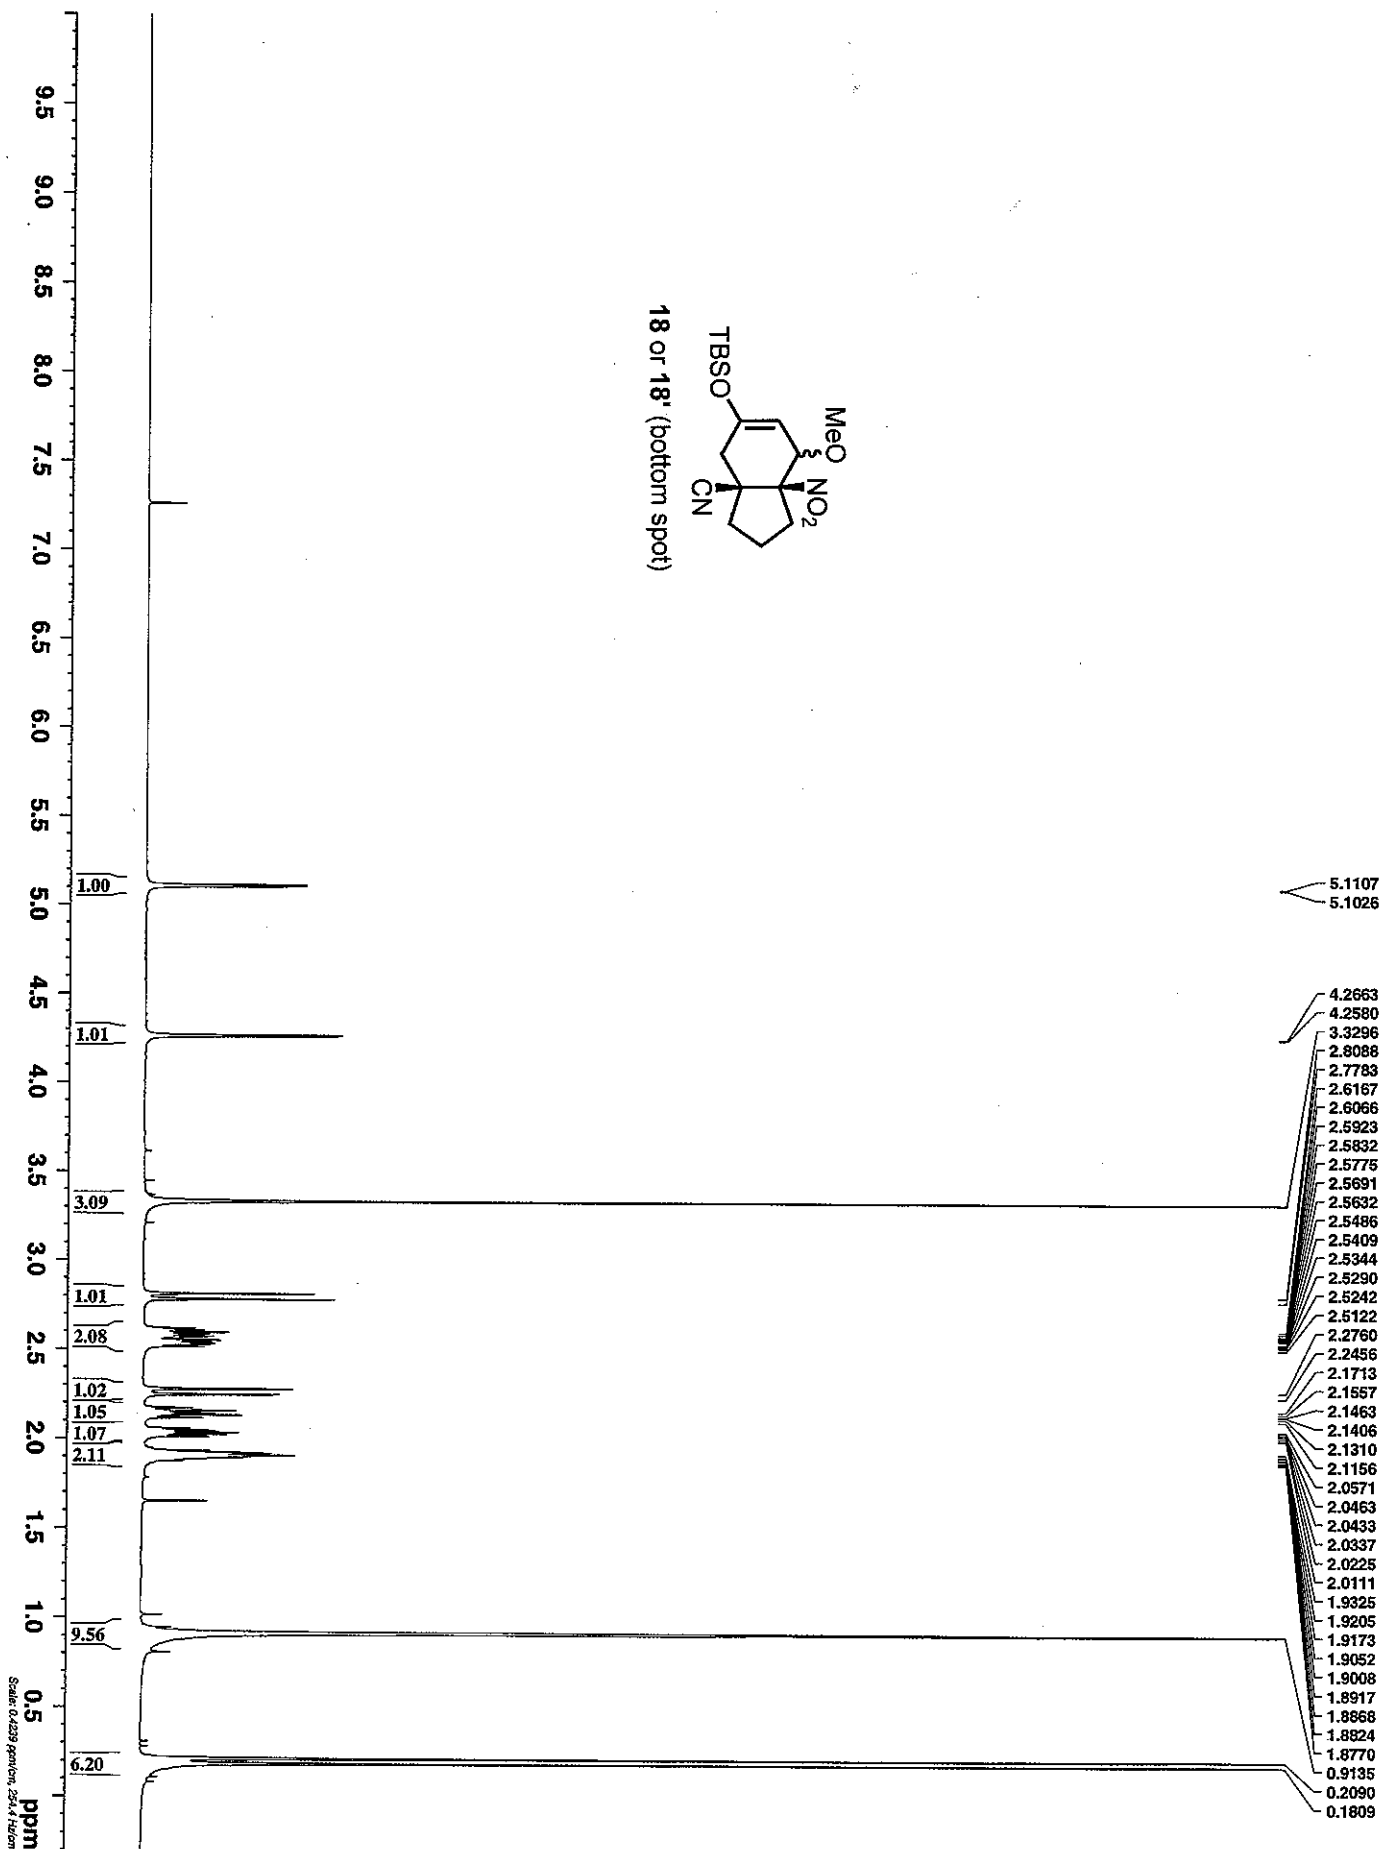

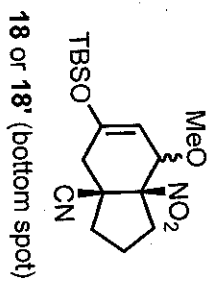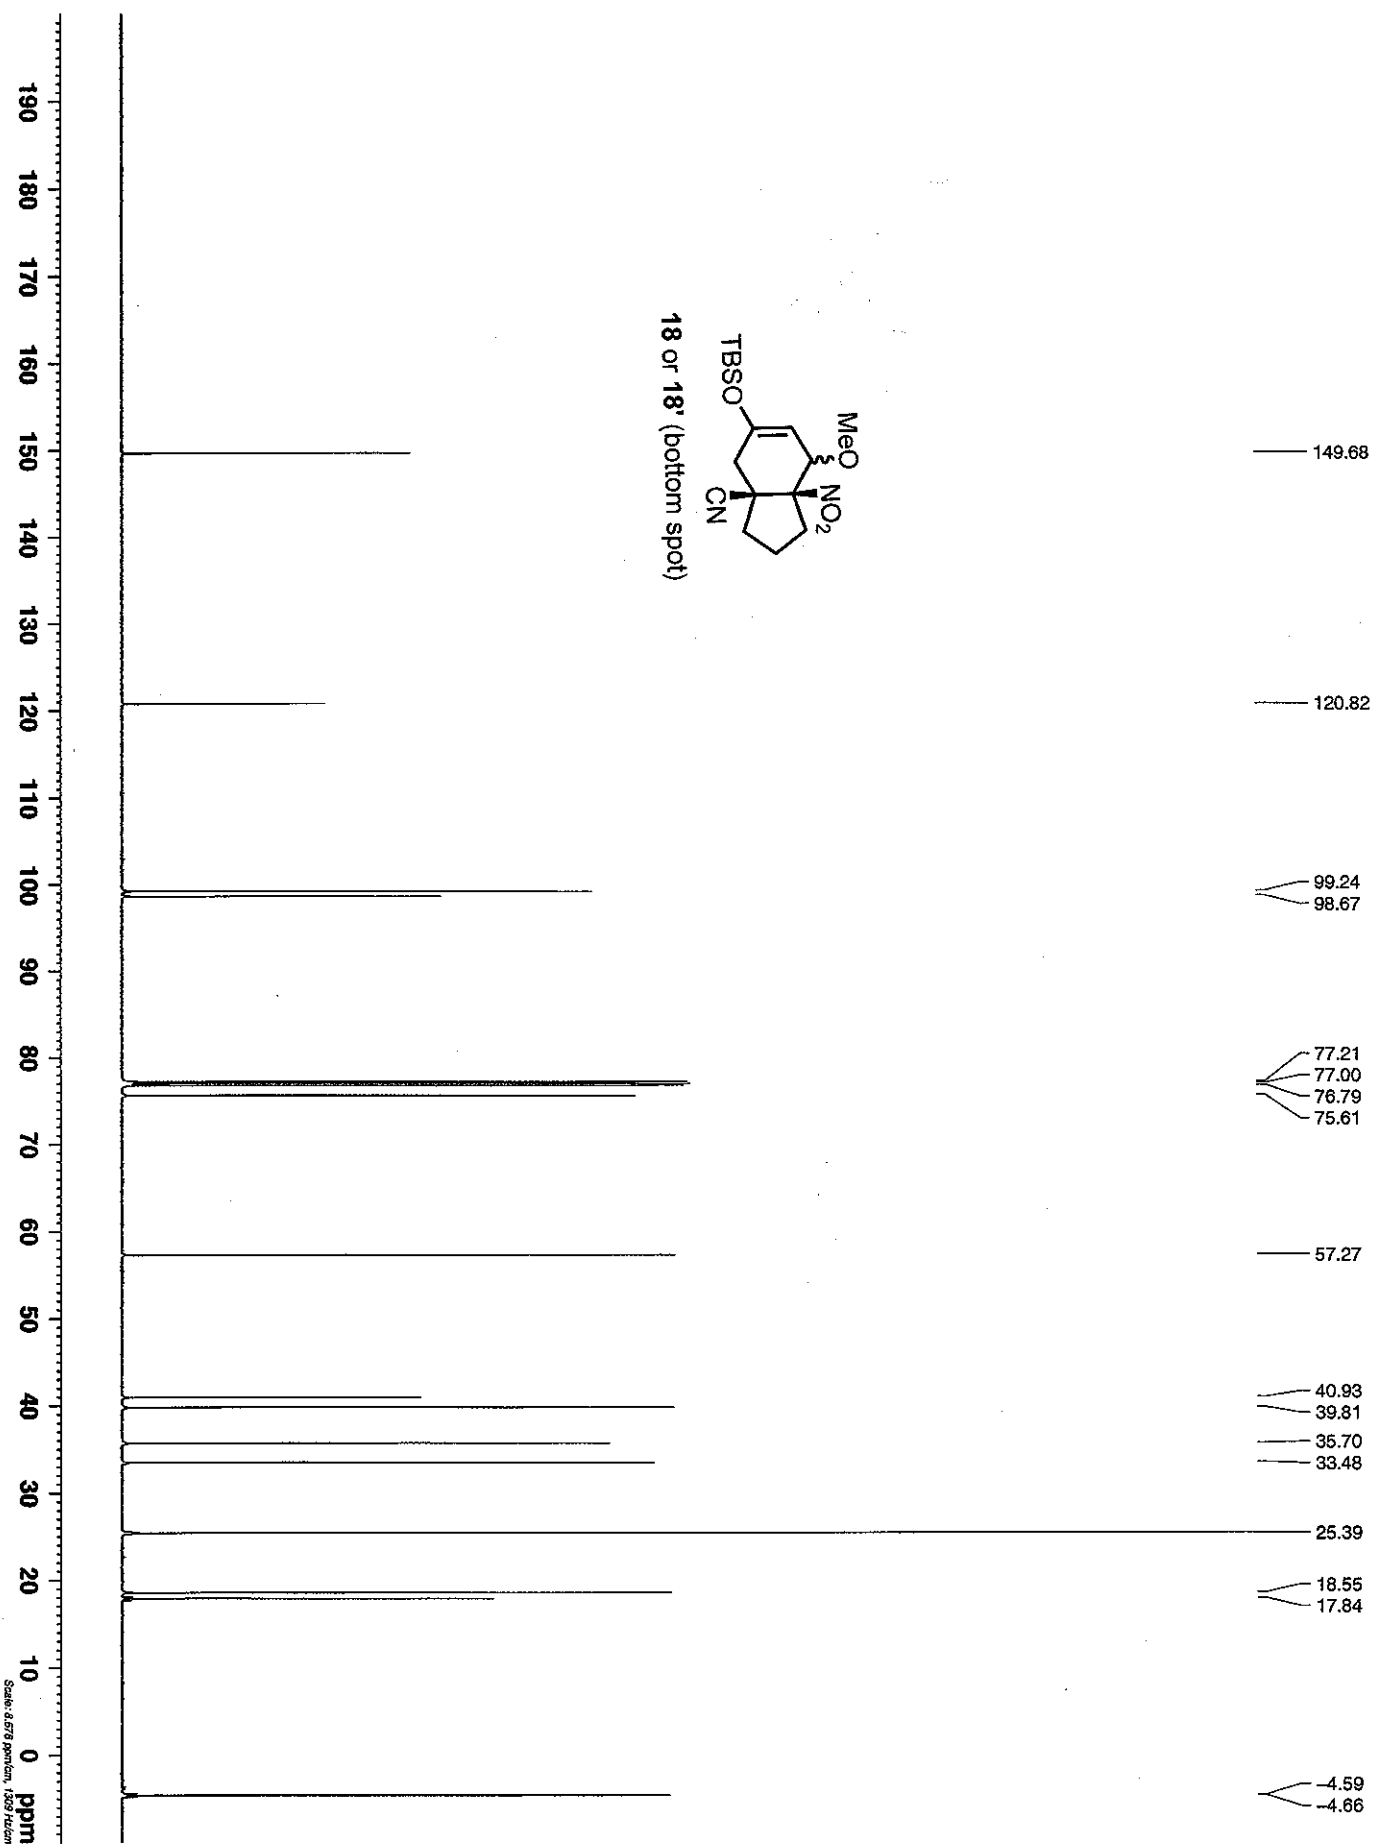

\* kinw12 AS1\_3\_281\_Hydrolyzed\_Major (10 1) CDCl3 24.0C November\_17\_2008\_15:50 Bruker AVIII+ 600MHz RRL1326: z930 : 1H 7.500 ppm \*

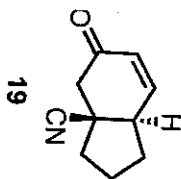

7.2600  
7.0518  
7.0497  
7.0352  
7.0331

6.1487  
6.1440  
6.1321  
6.1274

3.0604  
3.0325  
2.6322  
2.6280  
2.6240  
2.6201  
2.6157  
2.6113  
2.6066  
2.6025  
2.5986  
2.5944  
2.5904  
2.4048  
2.3769  
2.3001  
2.2975  
2.2855  
2.2823  
2.2761  
2.2643  
2.2620  
2.1827  
2.1783  
2.1668  
2.1626  
2.1564  
2.1502  
2.1460  
2.1425  
2.1344  
2.1297  
2.1239  
2.1138  
2.1097  
2.1056  
2.1000  
2.0954  
2.0909  
2.0857  
2.0823  
2.0762  
2.0723  
2.0681  
2.0579  
2.0534  
2.0123  
2.0057  
1.9931  
1.9885  
1.9847  
1.9783  
1.9748  
1.9725  
1.9702  
1.9668  
1.9656  
1.9608  
1.9568

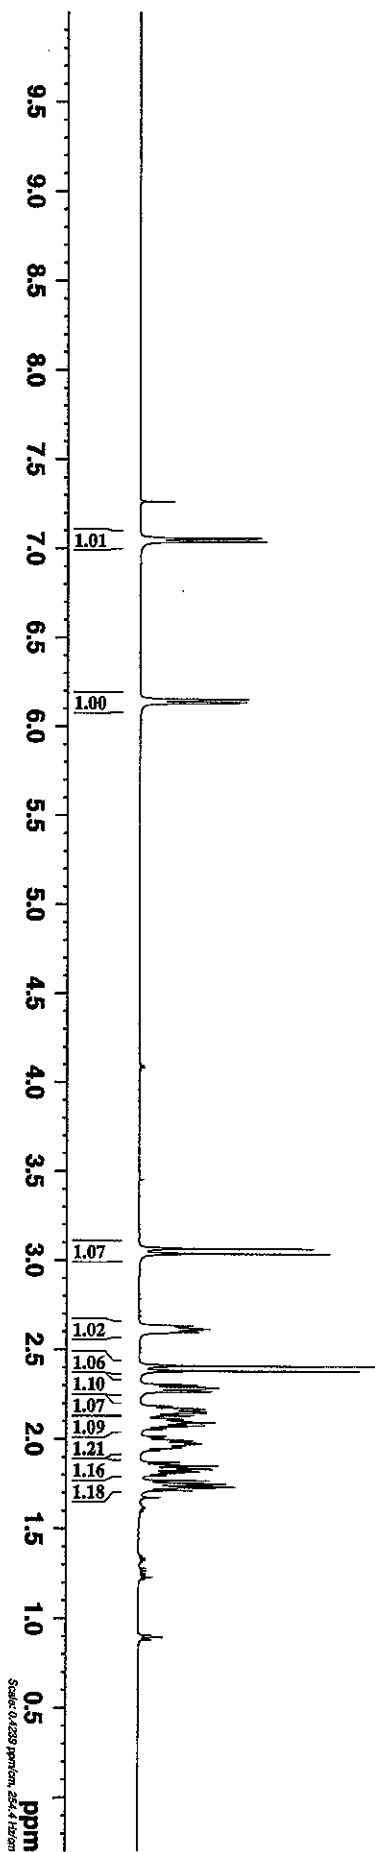

\* Klmw12 AS1\_3\_281\_MAJOR\_AGAIN (11 1) CDCl3 24.0C December\_30,2009\_18:41:08 Bruker AVIII 600MHz RRL1326: zpgg30 : 13C 110,000 ppm: 1H 4,500 ppm \*

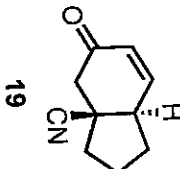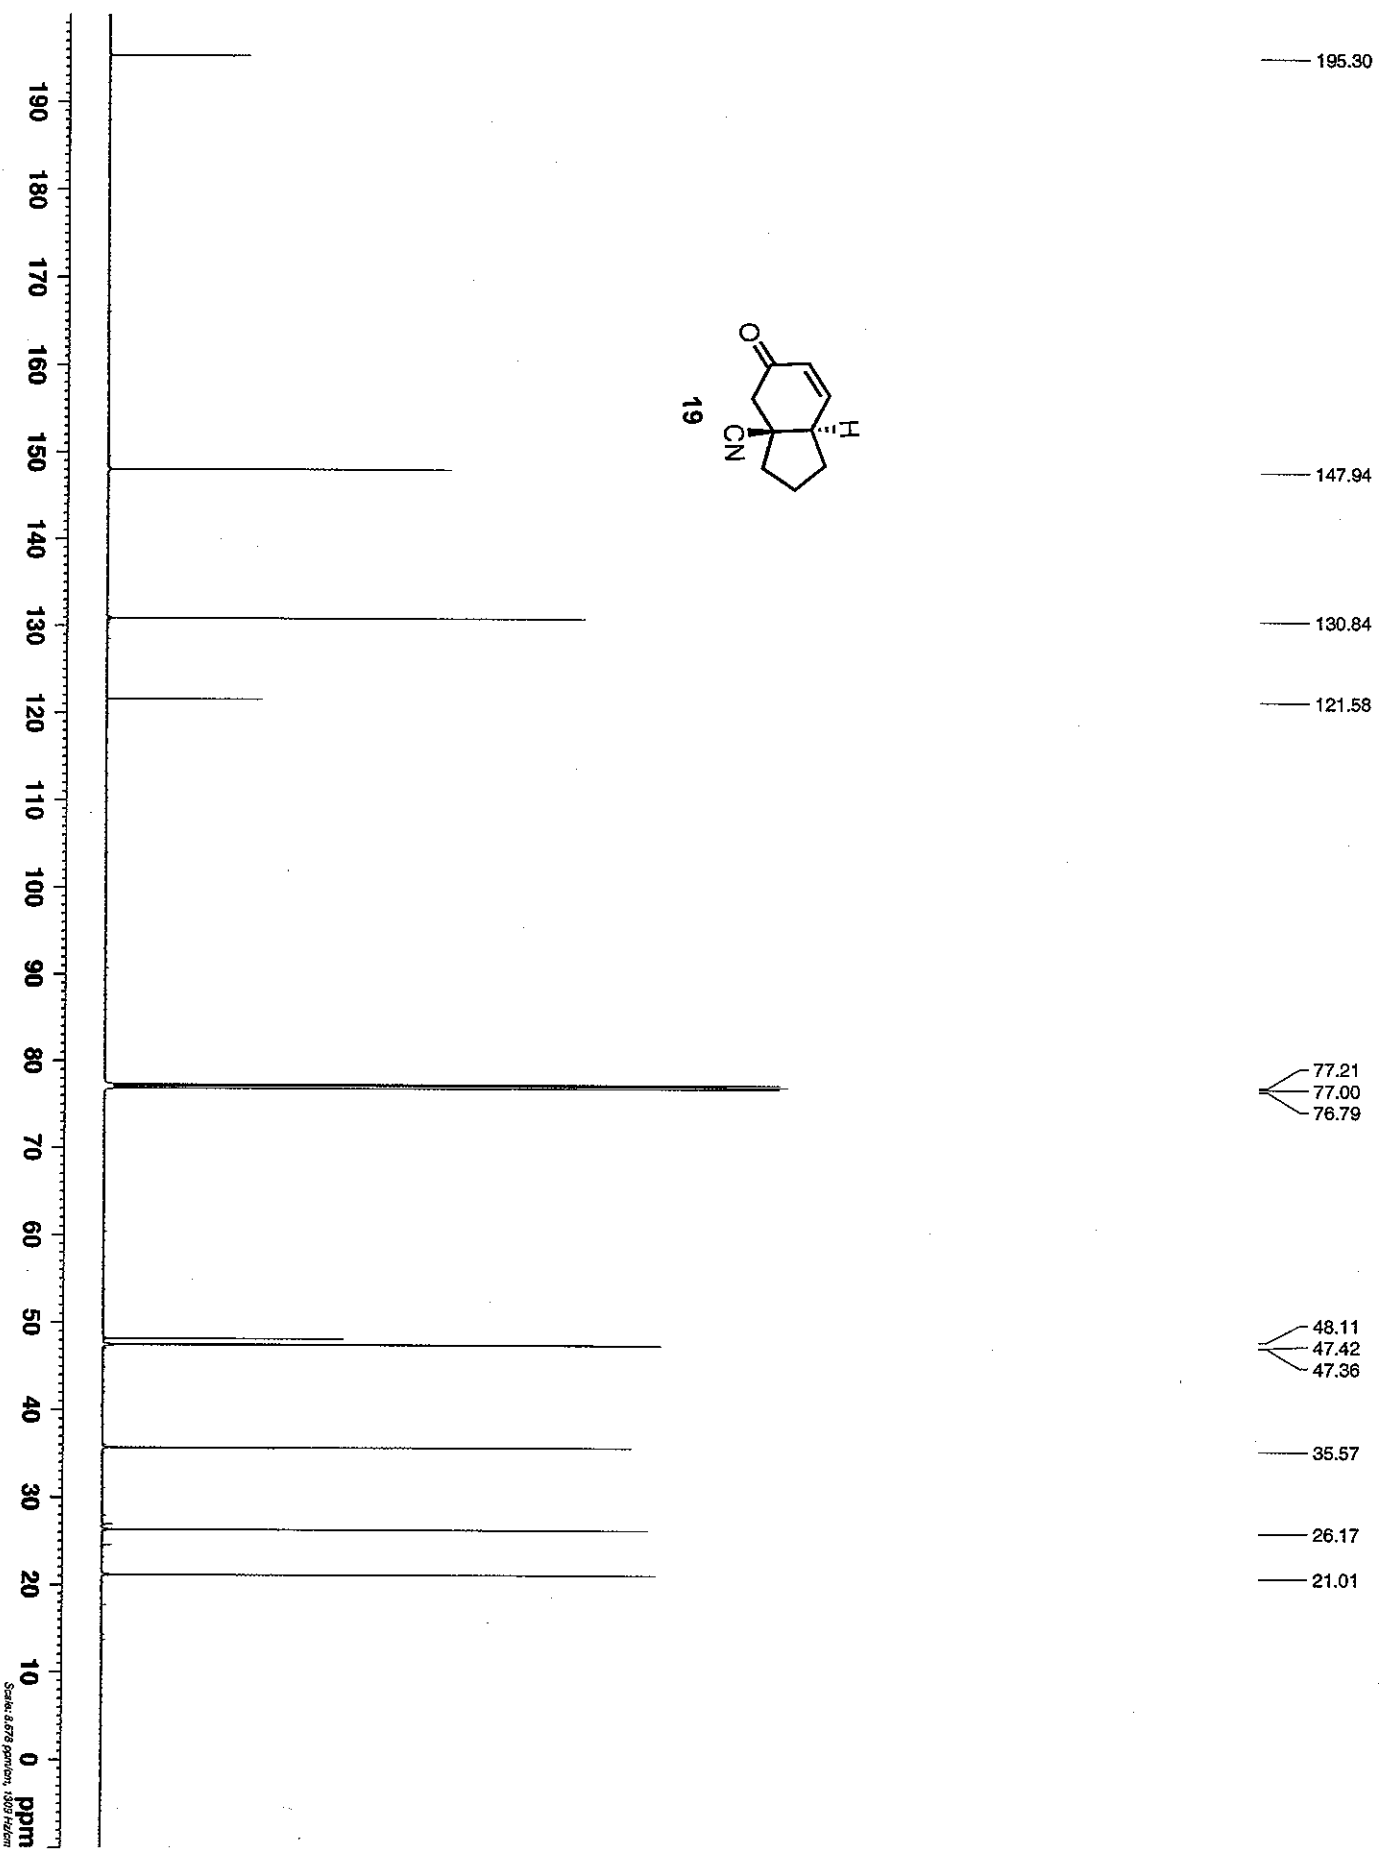

Scale: 0.678 ppm/cm, 1000 Hz/cm

\* kimw12 AS1\_3\_281\_Hydrolyzed\_mihor (10^-1) CDCl3 24.0C November\_17,2008\_18:39 Bruker AVII+ 600MHz RRL1326: zg30 : 1H 7.500 ppm \*

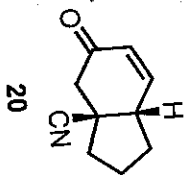

- 7.2597
- 6.7387
- 6.7325
- 6.7215
- 6.7153
- 6.0618
- 6.0586
- 6.0447
- 6.0414
- 3.1735
- 3.1646
- 3.1595
- 3.1558
- 3.1519
- 3.1427
- 2.8419
- 2.8142
- 2.7402
- 2.7125
- 2.3500
- 2.3436
- 2.3387
- 2.3355
- 2.3324
- 2.3293
- 2.3249
- 2.3171
- 2.3145
- 2.3081
- 2.3030
- 2.2931
- 2.2858
- 2.2707
- 2.2636
- 2.2568
- 2.2538
- 2.2503
- 2.2393
- 2.2371
- 1.9991
- 1.9944
- 1.9913
- 1.9873
- 1.9833
- 1.9787
- 1.9750
- 1.9720
- 1.9639
- 1.9576
- 1.9553
- 1.9480
- 1.9321
- 1.9296
- 1.9070
- 1.8972
- 1.8916
- 1.8835
- 1.8739
- 1.8690
- 1.8642
- 1.8567
- 1.8487

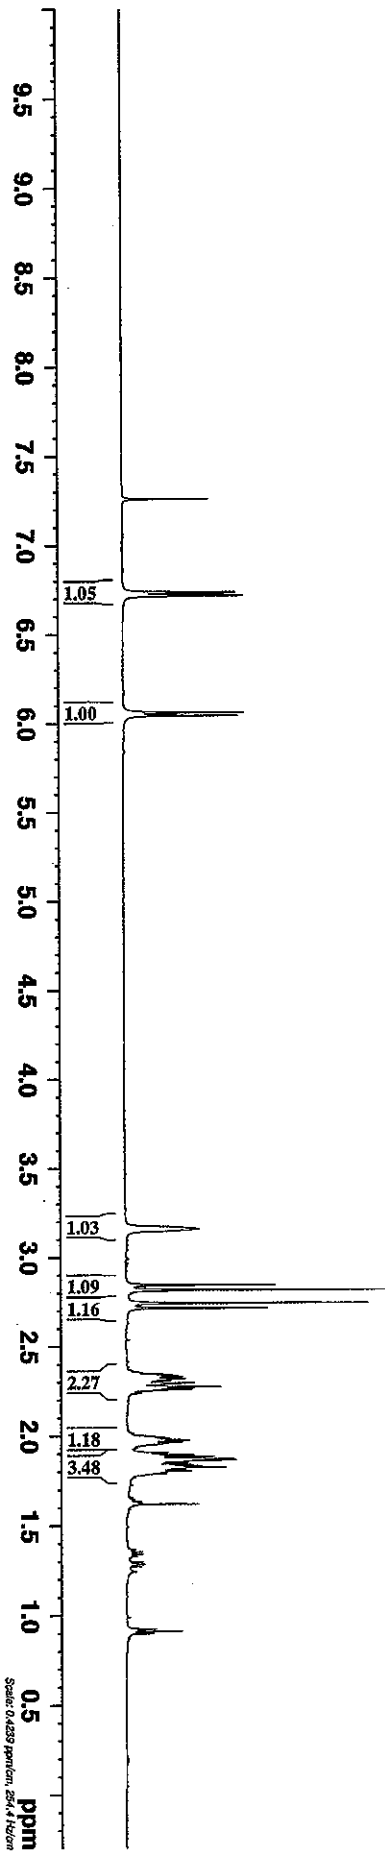



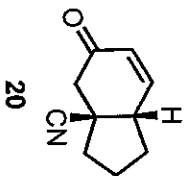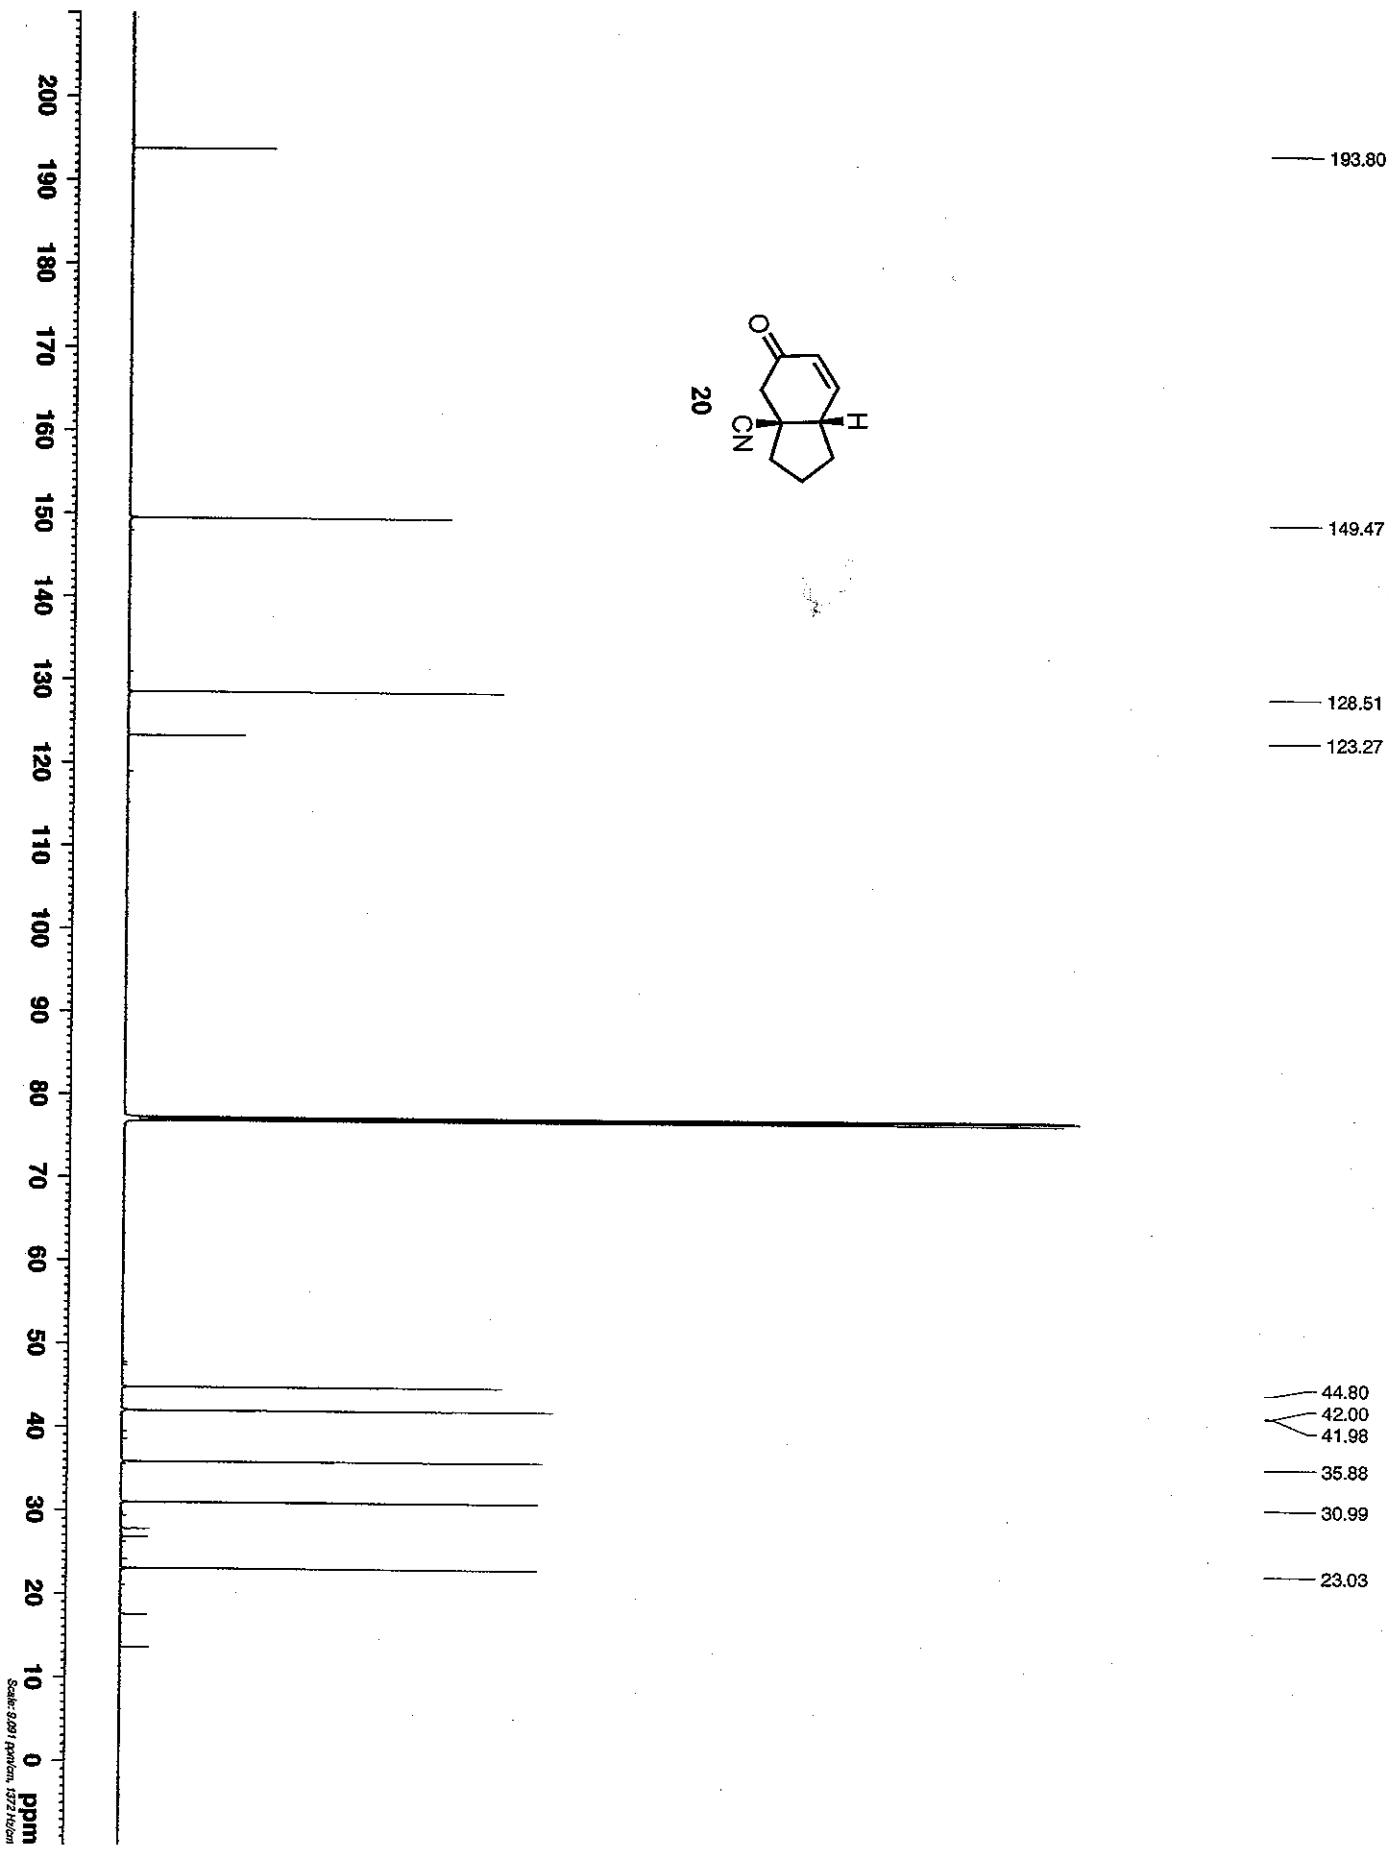

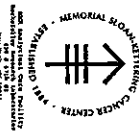

\* kinrw12 AS1\_3\_293\_Major (1) CDCl3 24.0C November\_25\_2008\_21:19 DRX 500MHz zg30 1H \*

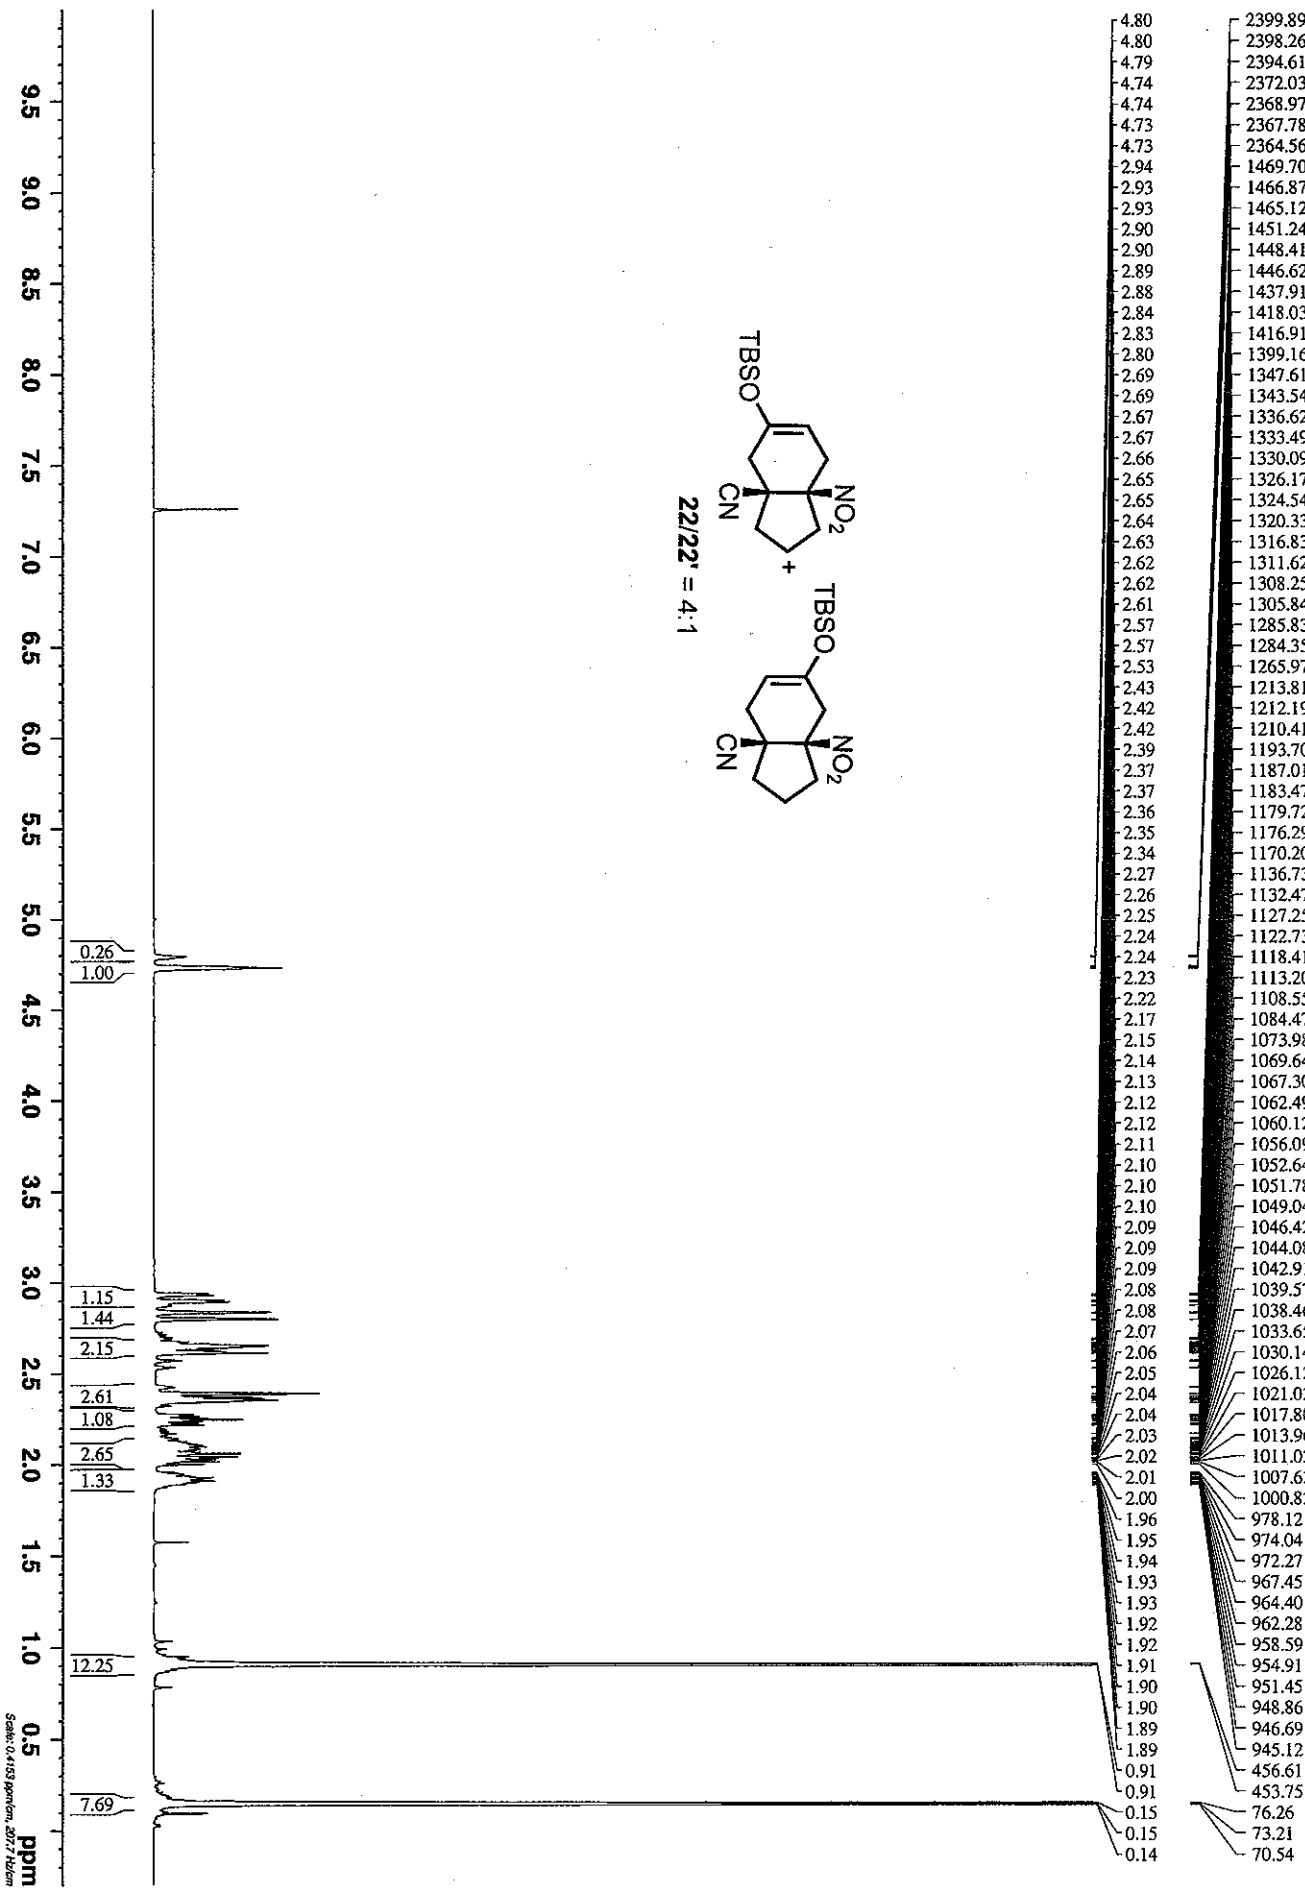

Scale: 0.4153 ppm/cm, 207.7 Hz/cm

Carbon \* kimw12 AS1\_3\_293 MAJOR\_13C (1 1) MeOD 24.0C November\_25,2008\_21:26 DRX 500MHz zgpg30 13C; 1H O2=4.000 \*

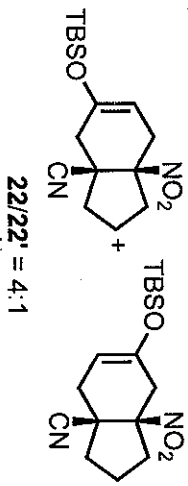

|          |        |
|----------|--------|
| 18358.20 | 145.98 |
| 15185.96 | 120.76 |
| 12277.34 | 97.63  |
| 11661.92 | 92.73  |
| 5550.08  | 44.13  |
| 4461.38  | 35.48  |
| 4391.60  | 34.92  |
| 4262.38  | 33.89  |
| 3985.99  | 31.70  |
| 3203.74  | 25.48  |
| 2346.02  | 17.86  |
| 2235.74  | 17.78  |
| -564.13  | -4.49  |
| -594.83  | -4.73  |

190 180 170 160 150 140 130 120 110 100 90 80 70 60 50 40 30 20 10 0 ppm

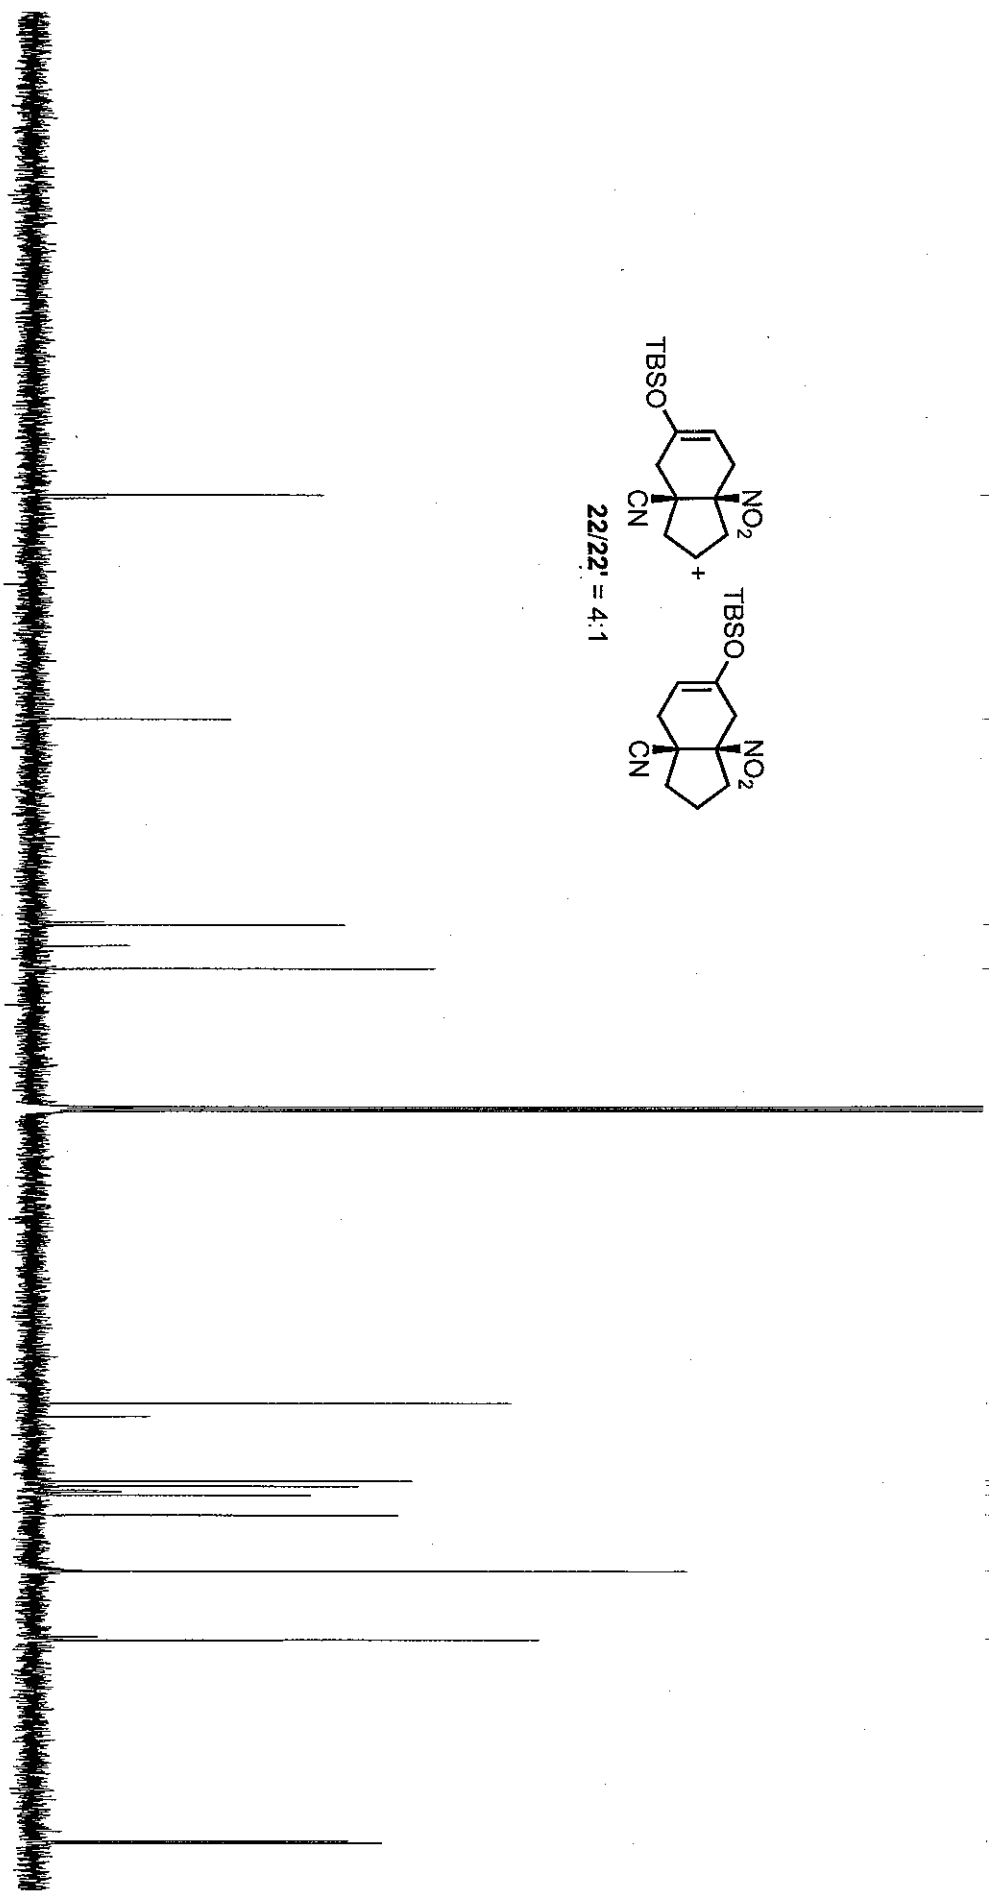

Scale: 8.488 ppm/cm, 1000 Hz/cm

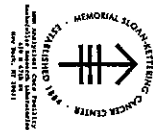

\* Kimw12 AS1\_3\_303\_MAJOR (1 1) CDC13 24.0C November\_29\_2008\_18:28 DRX 500MHz zg30 1H \*

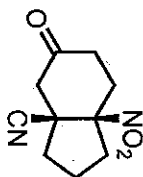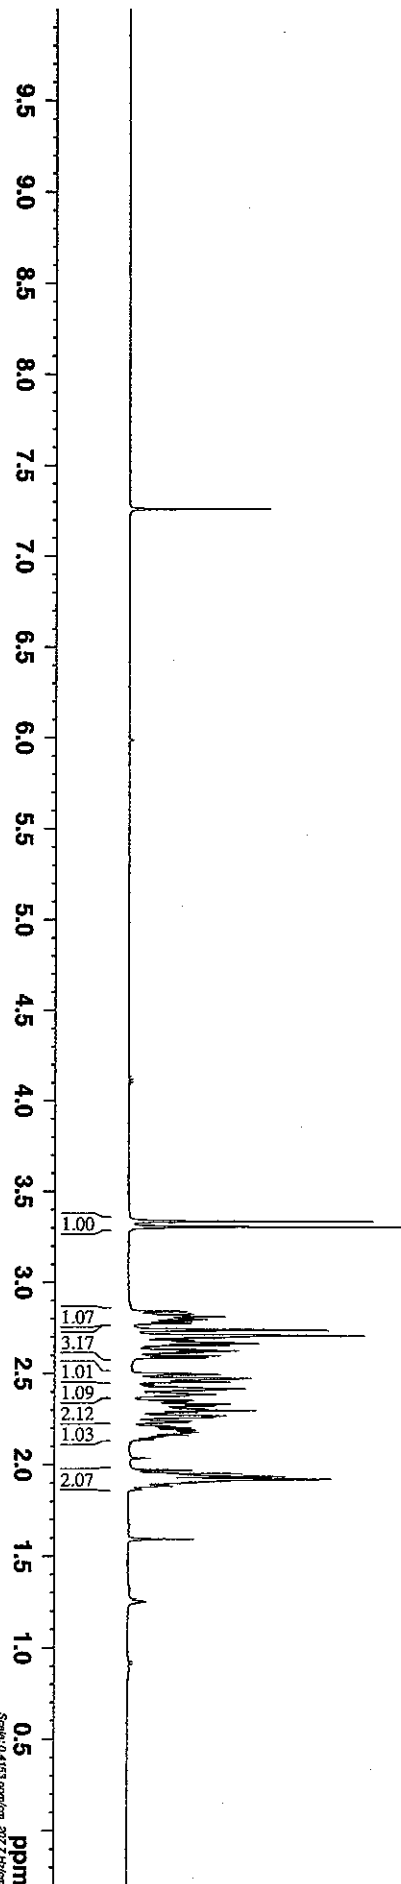

| Chemical Shift (ppm) | Integration |
|----------------------|-------------|
| 3.34                 | 1668.42     |
| 3.31                 | 1652.92     |
| 2.84                 | 1420.86     |
| 2.83                 | 1413.62     |
| 2.82                 | 1409.08     |
| 2.81                 | 1406.37     |
| 2.80                 | 1402.35     |
| 2.80                 | 1399.63     |
| 2.79                 | 1394.60     |
| 2.78                 | 1388.38     |
| 2.74                 | 1369.91     |
| 2.71                 | 1355.63     |
| 2.71                 | 1354.09     |
| 2.70                 | 1351.49     |
| 2.69                 | 1347.77     |
| 2.68                 | 1341.69     |
| 2.68                 | 1338.81     |
| 2.67                 | 1335.88     |
| 2.67                 | 1332.96     |
| 2.66                 | 1328.08     |
| 2.64                 | 1322.22     |
| 2.63                 | 1315.22     |
| 2.63                 | 1313.13     |
| 2.62                 | 1309.42     |
| 2.61                 | 1307.37     |
| 2.60                 | 1299.73     |
| 2.59                 | 1293.92     |
| 2.50                 | 1249.95     |
| 2.49                 | 1247.76     |
| 2.48                 | 1238.29     |
| 2.47                 | 1236.88     |
| 2.47                 | 1234.44     |
| 2.46                 | 1231.29     |
| 2.45                 | 1227.55     |
| 2.44                 | 1218.92     |
| 2.42                 | 1212.72     |
| 2.42                 | 1208.50     |
| 2.41                 | 1205.47     |
| 2.41                 | 1203.81     |
| 2.39                 | 1197.72     |
| 2.39                 | 1196.04     |
| 2.39                 | 1194.86     |
| 2.39                 | 1193.26     |
| 2.38                 | 1191.82     |
| 2.38                 | 1189.93     |
| 2.38                 | 1188.23     |
| 2.35                 | 1176.10     |
| 2.34                 | 1172.15     |
| 2.33                 | 1166.99     |
| 2.32                 | 1162.43     |
| 2.32                 | 1158.00     |
| 2.31                 | 1156.41     |
| 2.31                 | 1152.87     |
| 2.30                 | 1149.06     |
| 2.29                 | 1143.91     |
| 2.27                 | 1135.55     |
| 2.27                 | 1133.84     |
| 2.26                 | 1131.24     |
| 2.26                 | 1129.33     |
| 2.24                 | 1120.38     |
| 2.23                 | 1116.33     |
| 2.21                 | 1106.88     |
| 2.21                 | 1102.86     |

Carbon . \* Kimw12 AS1\_3\_303\_MAJOR\_13C (1 1) MeOD 24.0C November\_29,2008\_18:33 DRX 500MHz zgpg30 13C; 1H O2=4.000 \*

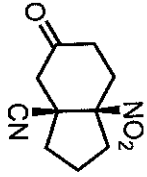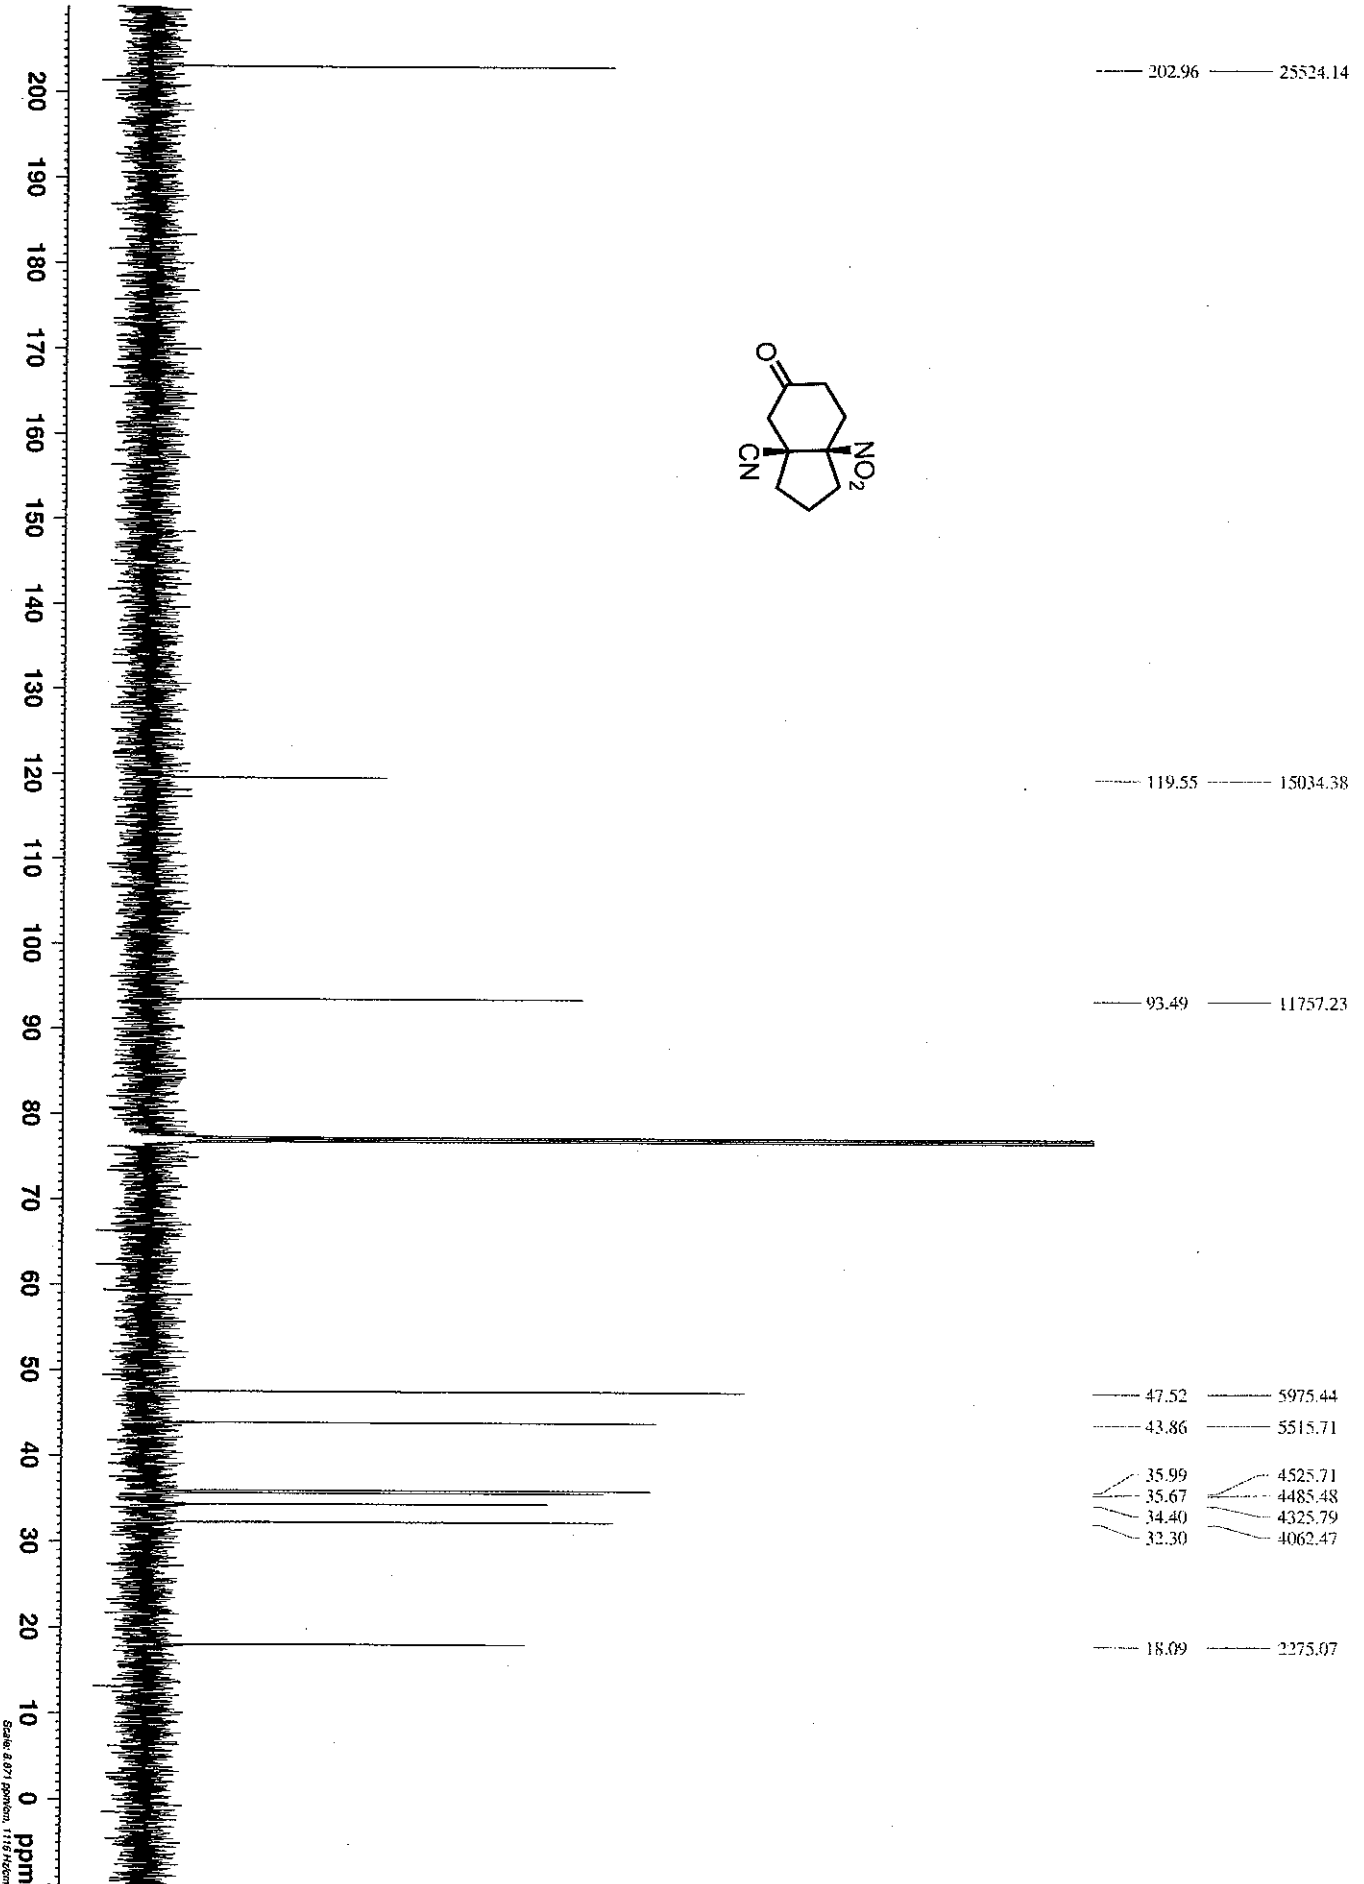

\* kimw12 AS1\_4\_003\_MINOR (10 1) CDC13 24.0C January\_03,2010\_19:42:25 Bruker AVIII 600MHz RRL1326: zg30 : 1H 7.500 ppm \*

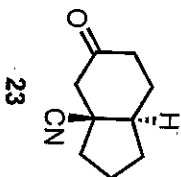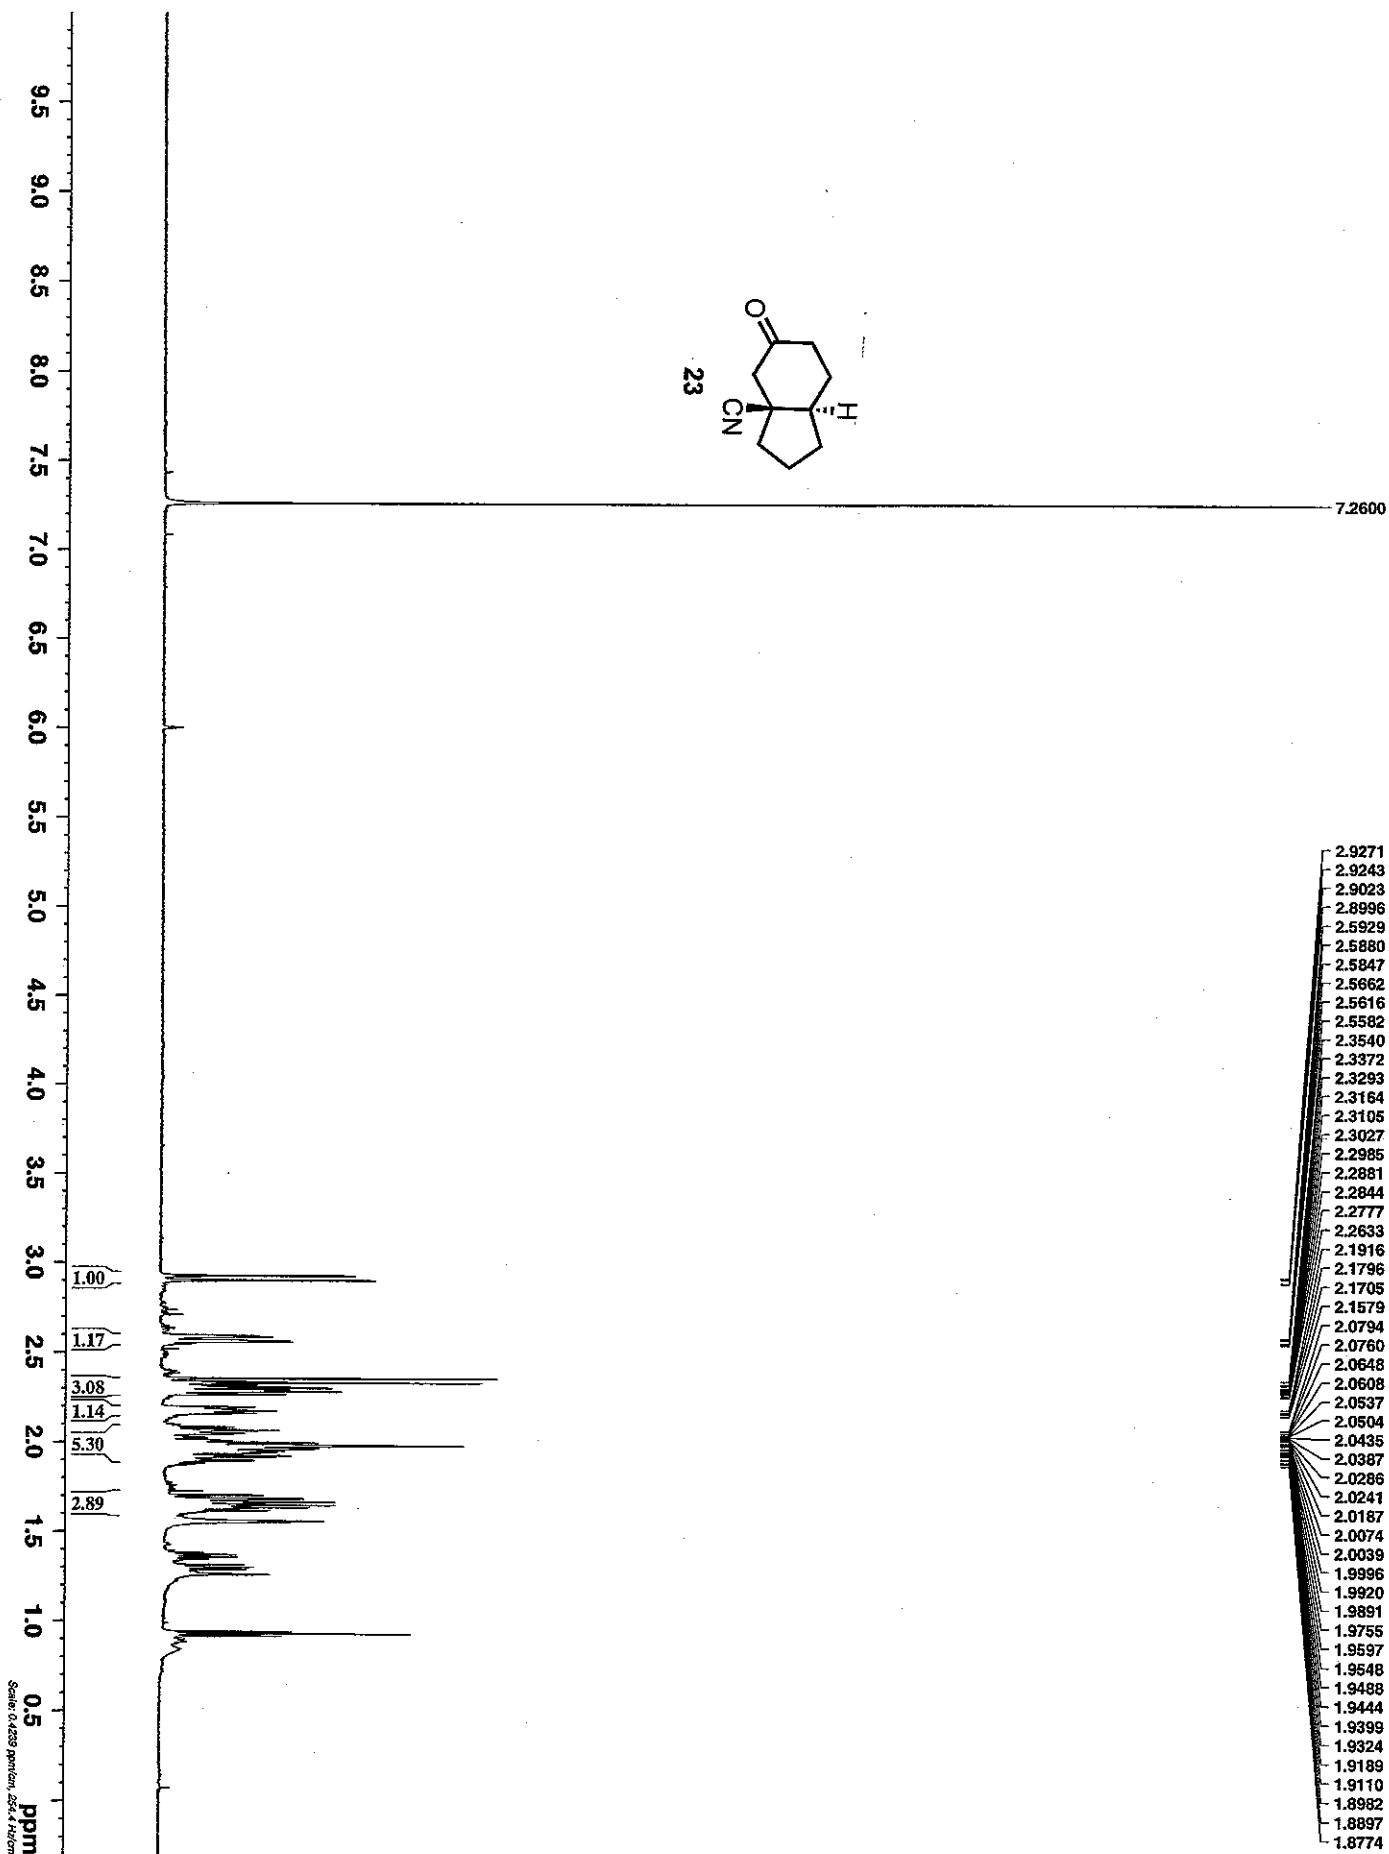

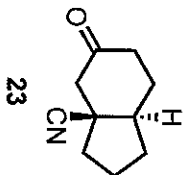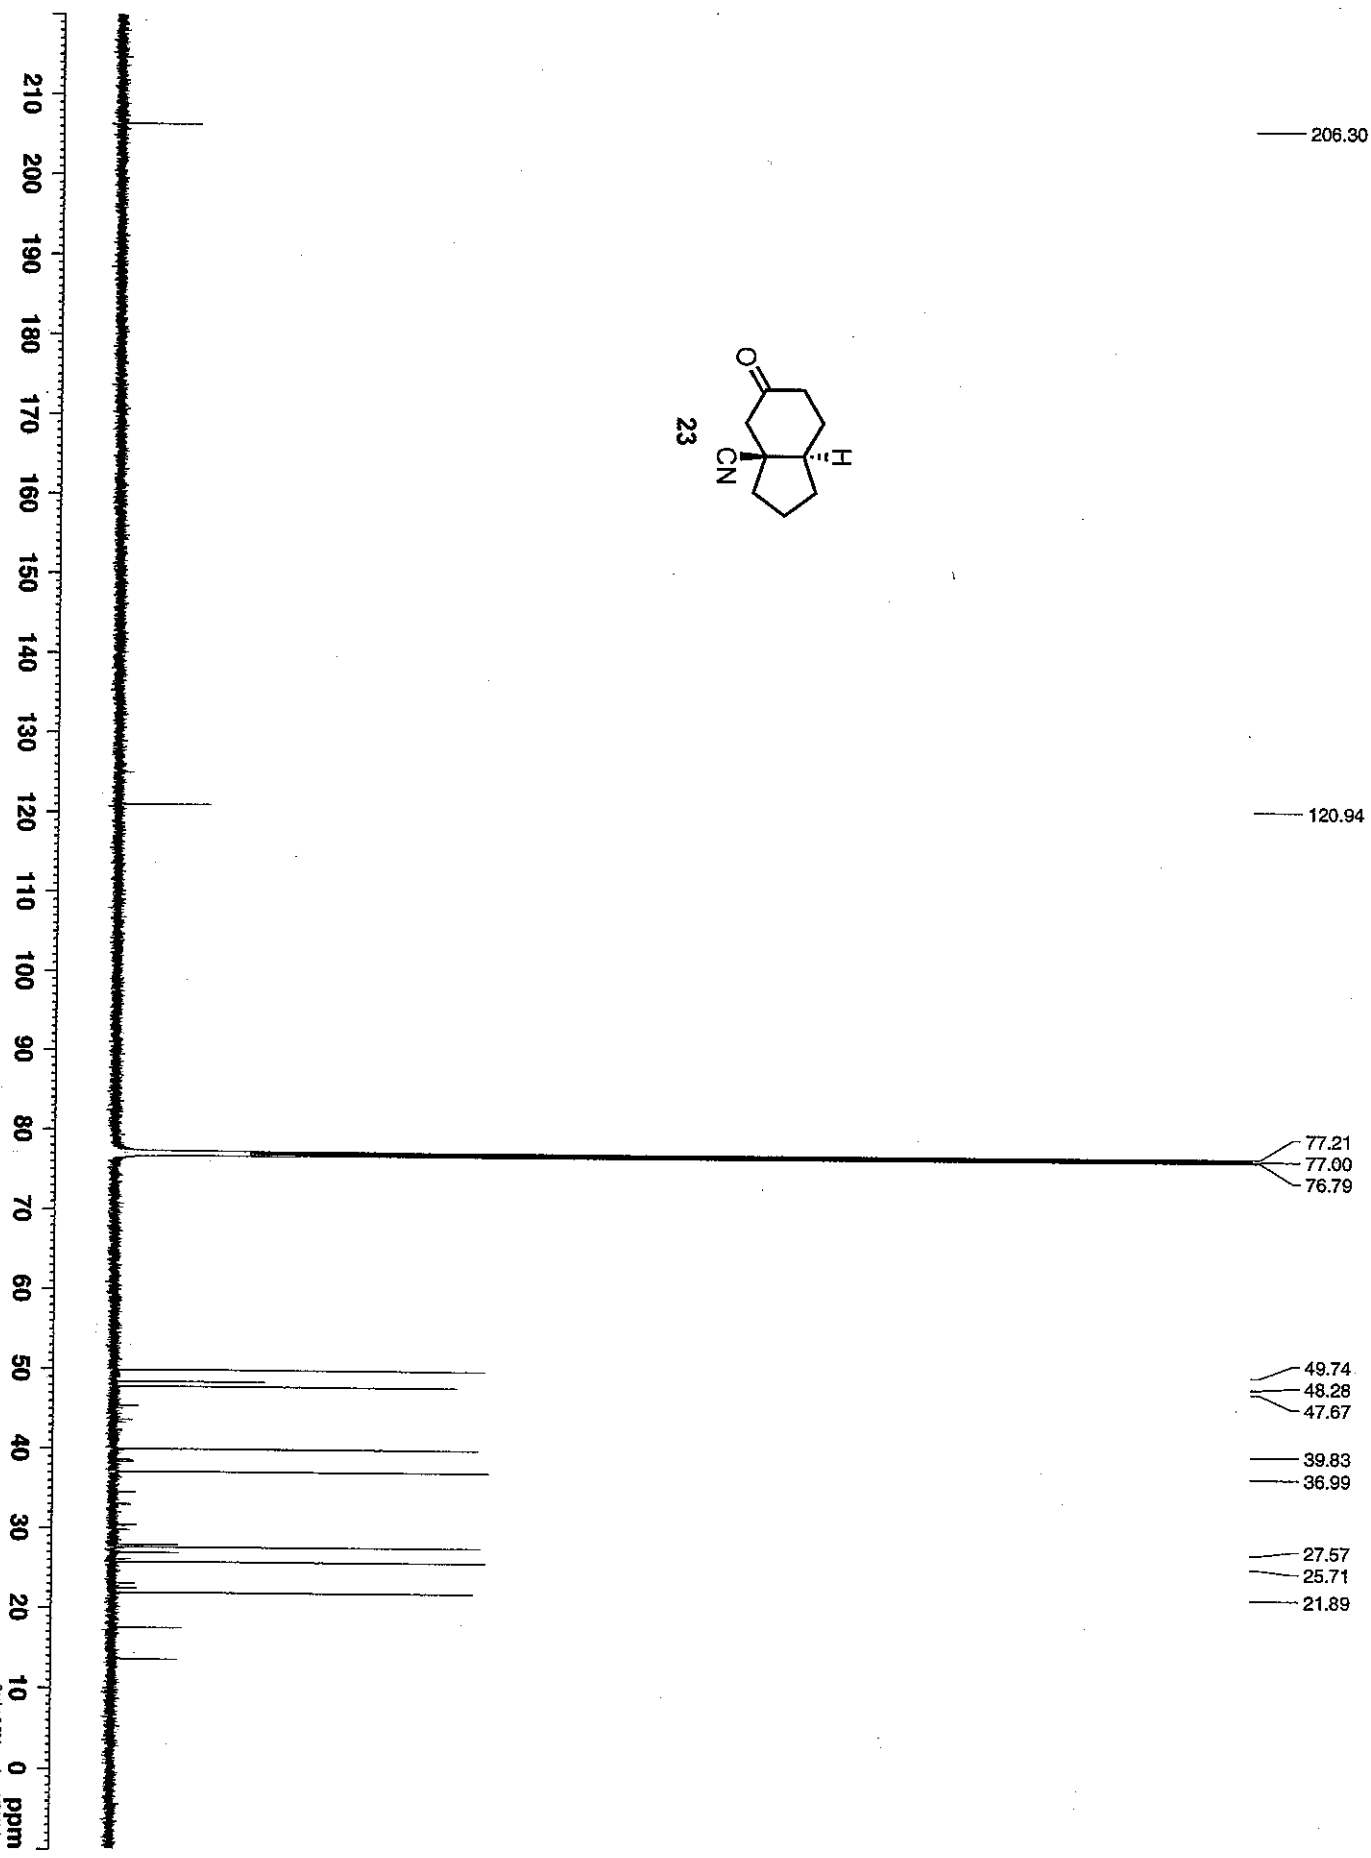

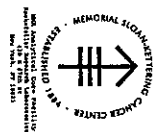

\* kimw12 AS1\_4\_003\_MAJOR (1) CDCl3 24.0C November\_29\_2008\_23:41 DRX 500MHz zg30 1H \*

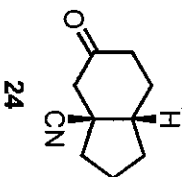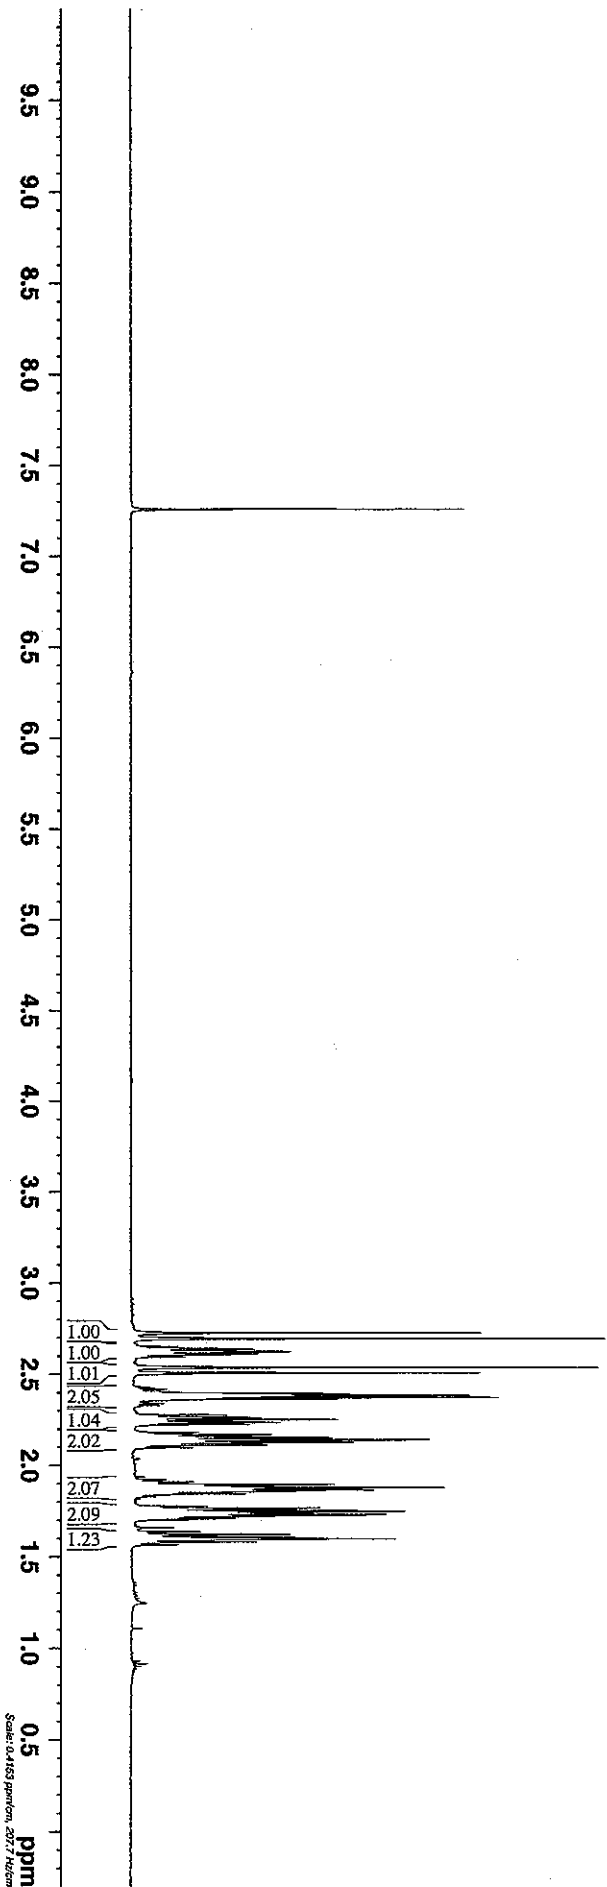

| Chemical Shift (ppm) | Integration |
|----------------------|-------------|
| 7.26                 | 3629.56     |
| 2.73                 | 1363.27     |
| 2.70                 | 1347.95     |
| 2.65                 | 1326.65     |
| 2.64                 | 1318.78     |
| 2.62                 | 1312.07     |
| 2.61                 | 1305.65     |
| 2.60                 | 1297.92     |
| 2.54                 | 1268.73     |
| 2.51                 | 1253.41     |
| 2.42                 | 1209.27     |
| 2.40                 | 1202.38     |
| 2.40                 | 1198.46     |
| 2.39                 | 1195.16     |
| 2.38                 | 1192.06     |
| 2.38                 | 1189.87     |
| 2.37                 | 1186.23     |
| 2.36                 | 1181.26     |
| 2.34                 | 1169.74     |
| 2.33                 | 1164.50     |
| 2.28                 | 1138.10     |
| 2.26                 | 1132.62     |
| 2.26                 | 1130.71     |
| 2.25                 | 1125.07     |
| 2.23                 | 1117.79     |
| 2.22                 | 1111.99     |
| 2.18                 | 1090.11     |
| 2.17                 | 1084.51     |
| 2.17                 | 1083.31     |
| 2.15                 | 1077.61     |
| 2.15                 | 1075.58     |
| 2.14                 | 1072.08     |
| 2.14                 | 1069.97     |
| 2.13                 | 1063.30     |
| 2.12                 | 1062.50     |
| 2.11                 | 1056.43     |
| 2.11                 | 1054.82     |
| 2.10                 | 1048.56     |
| 1.92                 | 960.09      |
| 1.91                 | 954.37      |
| 1.90                 | 952.30      |
| 1.89                 | 946.69      |
| 1.88                 | 942.51      |
| 1.88                 | 938.86      |
| 1.87                 | 936.65      |
| 1.87                 | 934.78      |
| 1.86                 | 931.10      |
| 1.86                 | 929.06      |
| 1.85                 | 927.07      |
| 1.85                 | 923.30      |
| 1.84                 | 921.48      |
| 1.83                 | 913.60      |
| 1.77                 | 887.40      |
| 1.76                 | 882.28      |



Carbon . \* kimw12 AS1\_4\_003\_MAJOR\_13C (1 1) MeOD 24.0C November\_29,2008\_23:47 DRX 500MHz zgpg30 13C; 1H O2=4.000 \*

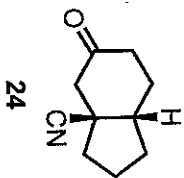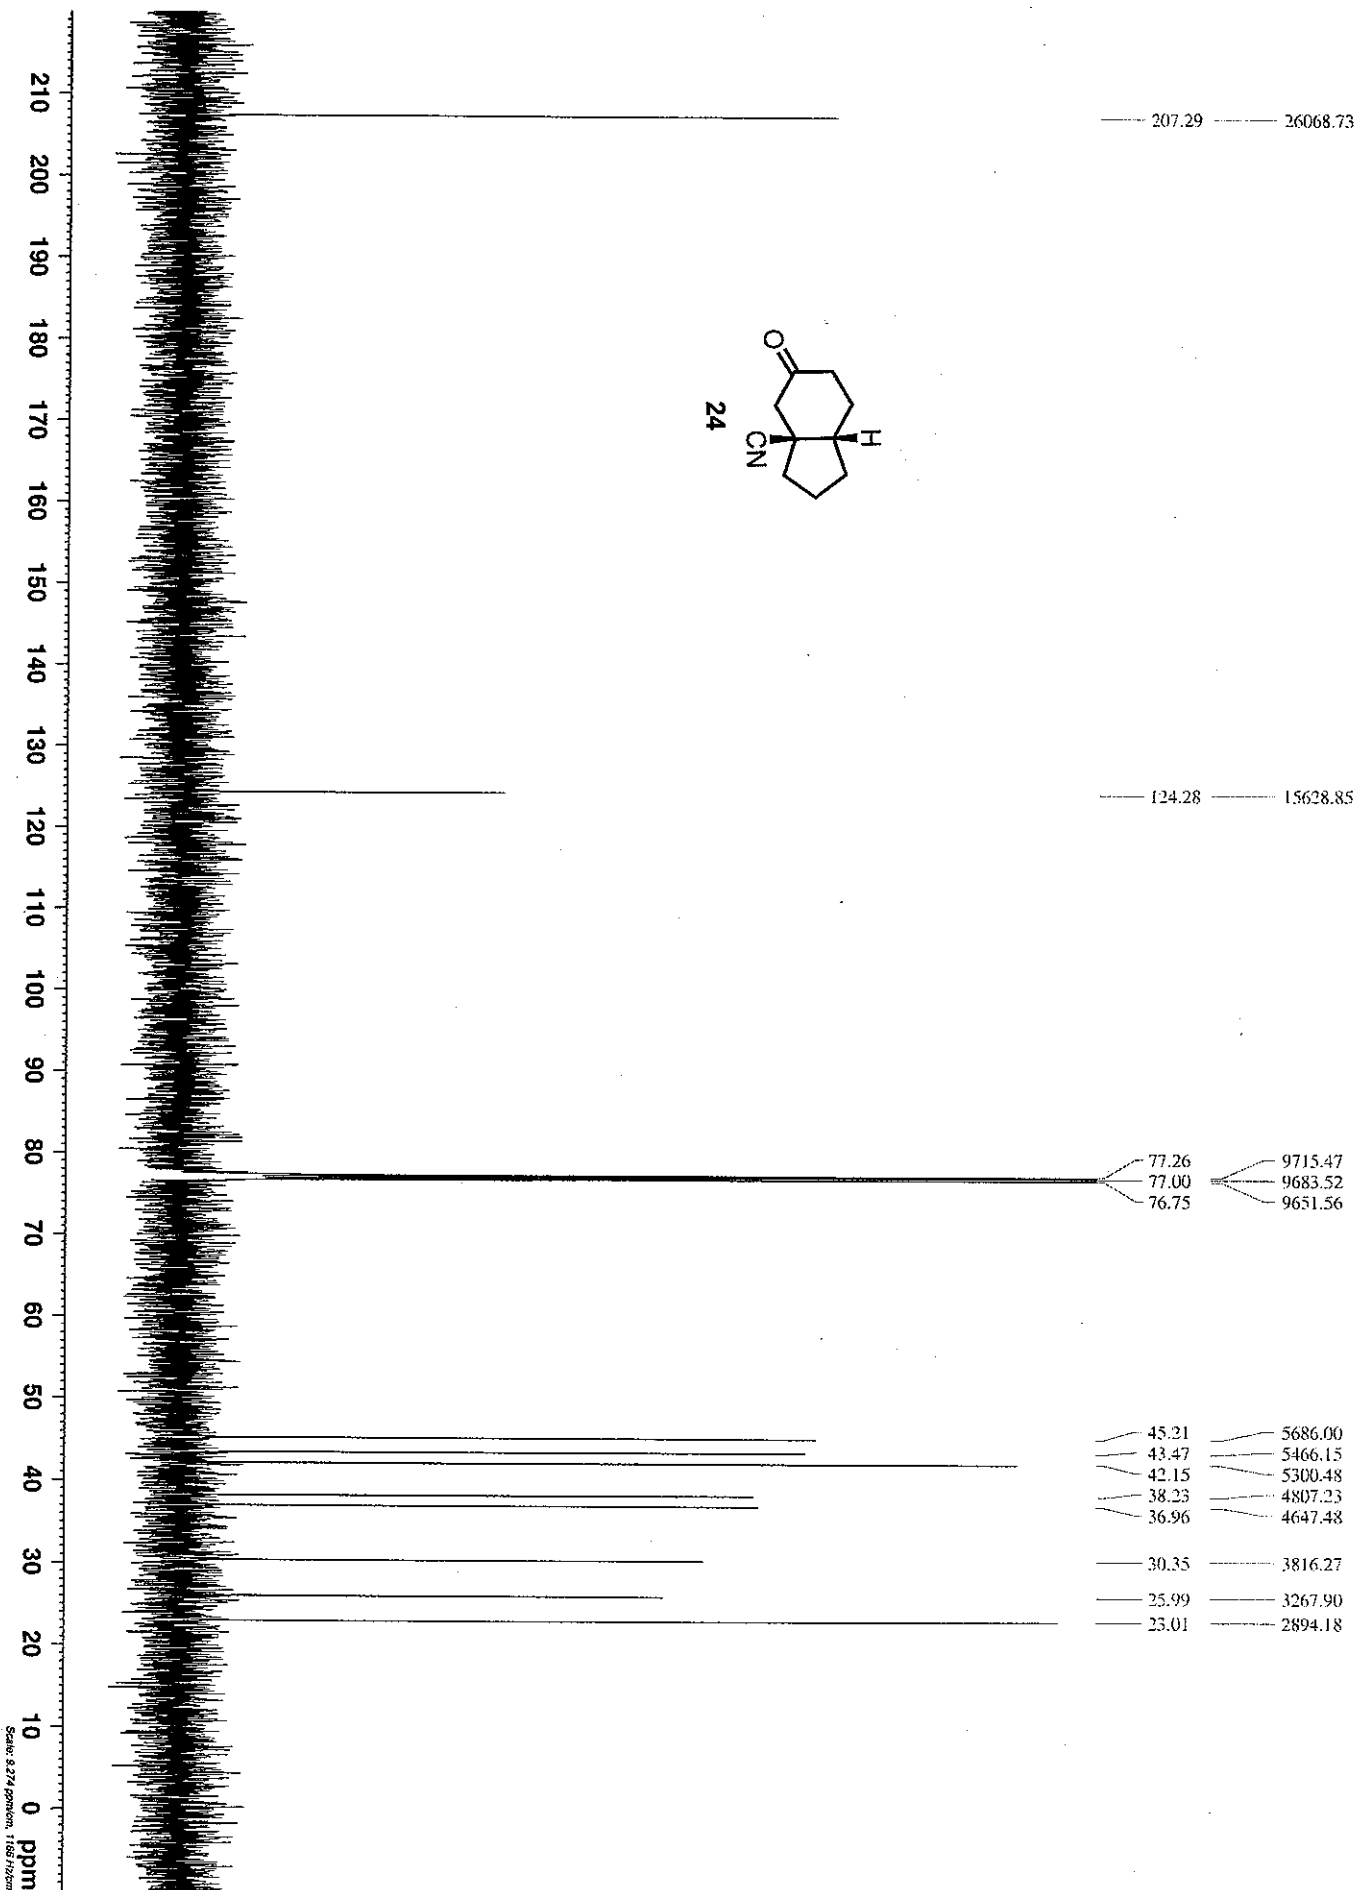

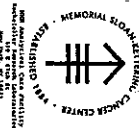

\* kinw12 AS1\_3\_245\_RIGHTABOVE (1) CDCl3 24.0C October\_18,2008\_18:29 DRX 500MHZ zg30 1H \*

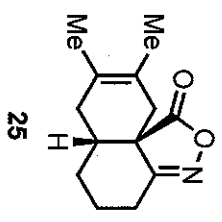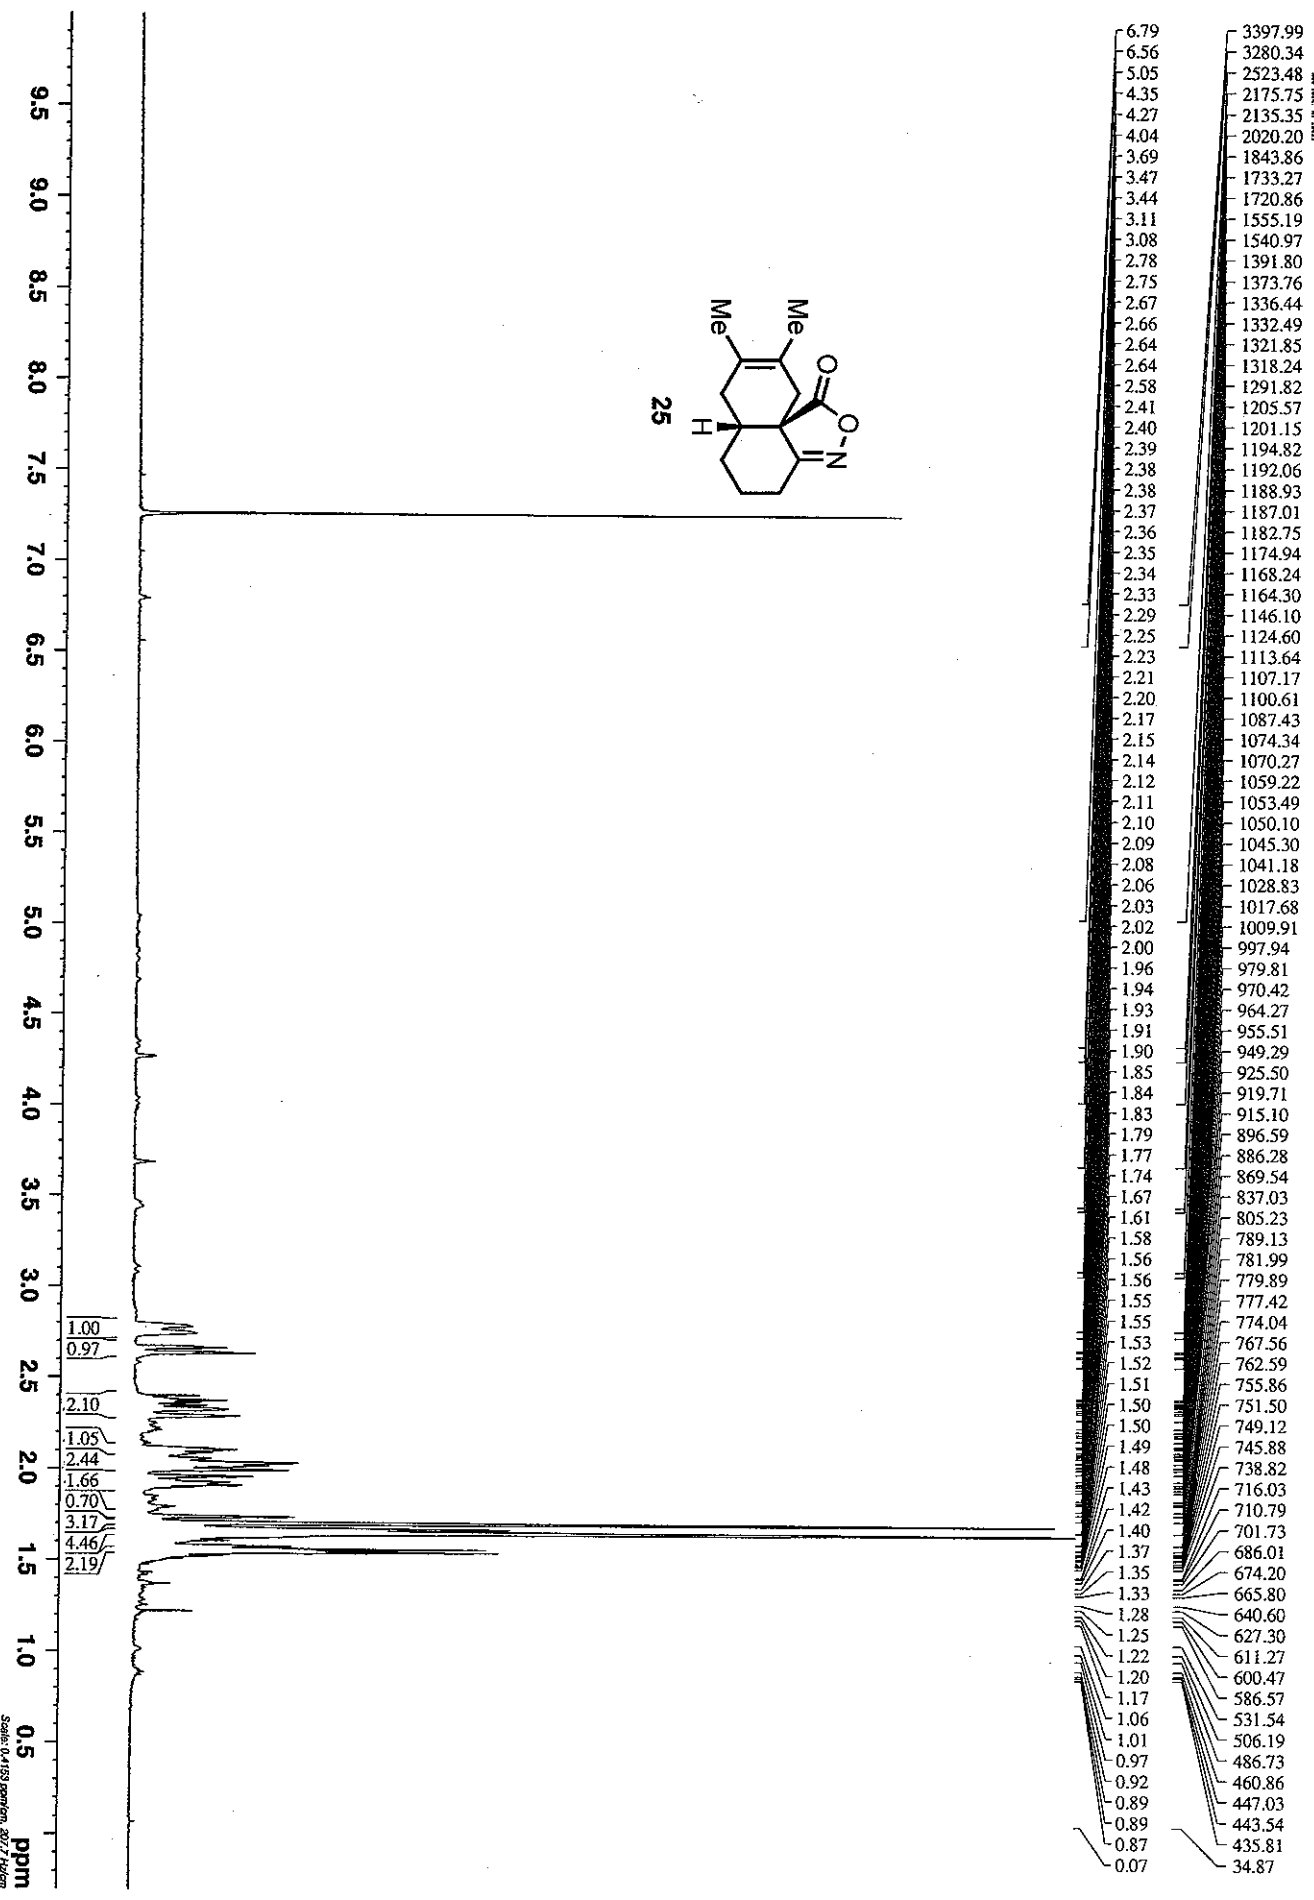

Scale: 0.4183 ppm/cm, 2077 Hz/cm

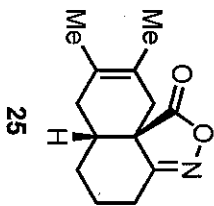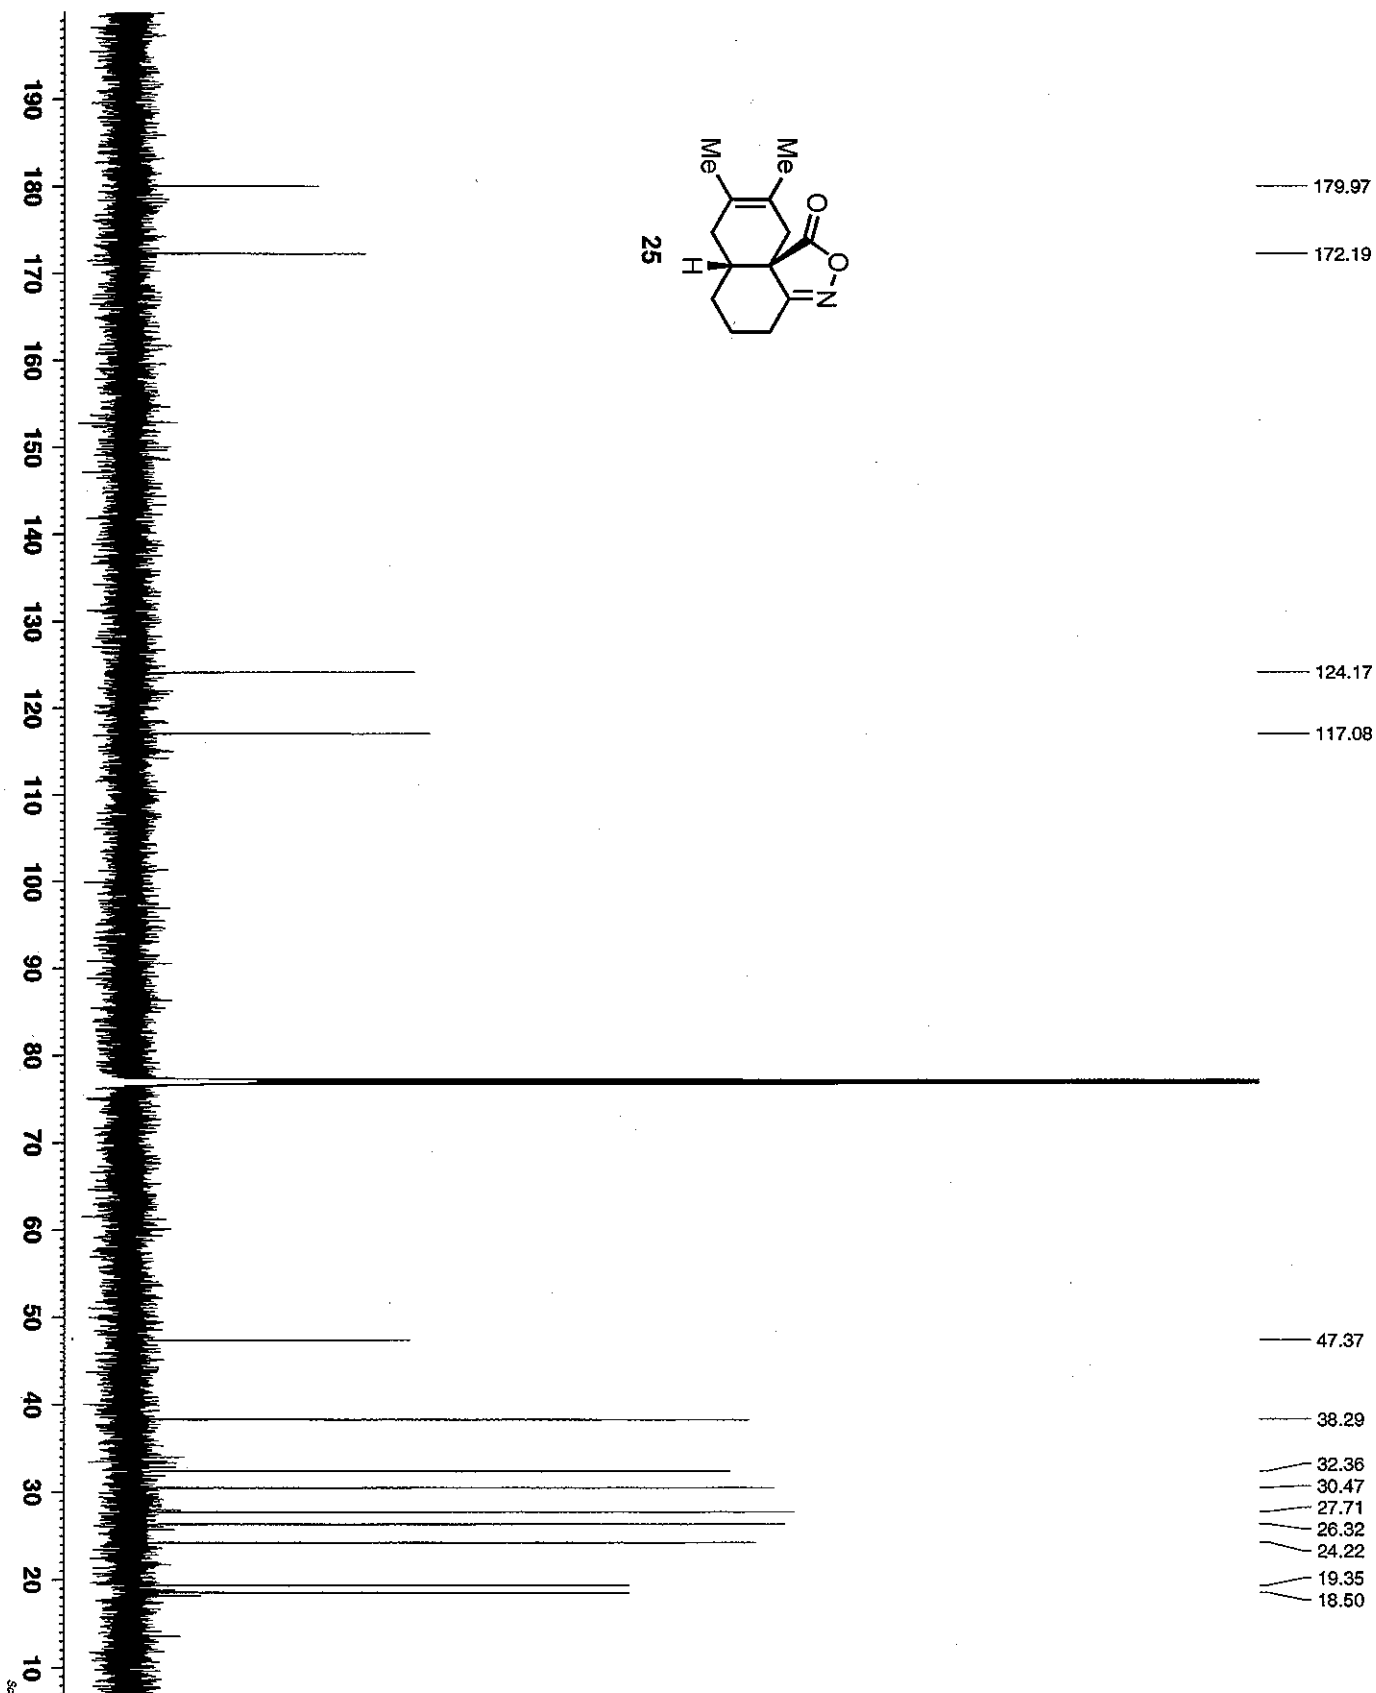

```

NAME          L7HCl-Exp144_1
EXPNO         2
PROCNO        1
Date_         20091208
Time          22.12
INSTRUM       spect
PROBHD        5 mm Multinucl
PULPROG       zg
TD            32768
SOLVENT       D2O
NS            12
DS            0
SWH           5995.204 Hz
FIDRES       0.182959 Hz
AQ           2.7329011 sec
RG           90.5
DE           83.400 usec
TE           6.00 usec
D1           333.1 K
D0           1.00000000 sec
TDO          1
===== CHANNEL f1 =====
NUC1          1H
P1           2.50 usec
Pl1          0.00 dB
SFO1         399.9225995 MHz
SI           32768
SF           399.9200098 MHz
WDW          EM
SSB          0
LB           0.20 Hz
GB           0
PC           1.00

```

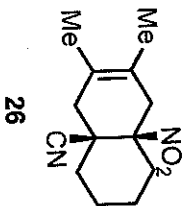

7.260

2.875  
2.830  
2.779  
2.732  
2.621  
2.574  
2.318  
2.307  
2.292  
2.282  
2.273  
2.257  
2.246  
2.240  
2.100  
2.088  
2.075  
2.066  
2.054  
2.040  
2.024  
1.863  
1.852  
1.837  
1.828  
1.806  
1.800  
1.774  
1.764  
1.750  
1.741  
1.727  
1.716  
1.704  
1.693  
1.645  
1.616

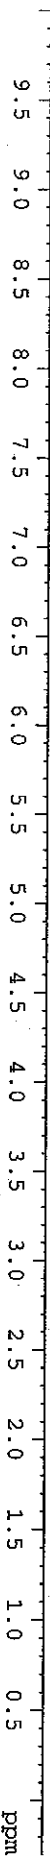

1.000  
1.042  
1.061  
2.147  
2.220  
12.012

NAME L7HCl-Exp144.1

EXPNO 13

PROCNO 1

Date\_ 20091208

Time 22.23

INSTRUM 5 mm Multinuc1

PROBHD spect

PULPROG zgpg30

TD 30902

SOLVENT Aceton

NS 1500

DS 0

SWH 22075.055 Hz

FIDRES 0.714357 Hz

AQ 0.6999803 sec

RG 16384

DM 22.650 usec

DE 6.00 usec

TE 333.1 K

D1 0.69999999 sec

d11 0.03000000 sec

DELTA 0.59999996 sec

TD0 1

===== CHANNEL f1 =====

NUC1 13C

P1 17.50 usec

PL1 -1.00 dB

SFO1 100.5699800 MHz

===== CHANNEL f2 =====

CPDPRG2 waltz16

NUC2 1H

PCPD2 96.25 usec

PL2 0.00 dB

PL12 23.00 dB

PL13 23.00 dB

SFO2 399.9215997 MHz

SI 65536

SF 100.5599529 MHz

MDW EM

SSB 0

LB 3.00 Hz

GB 0

PC 1.40

121.799  
121.402  
120.817

90.376

77.317  
77.000  
76.682

40.491  
39.699  
37.134  
33.859  
32.675

22.029  
20.933  
18.375  
18.191

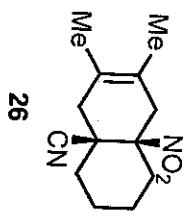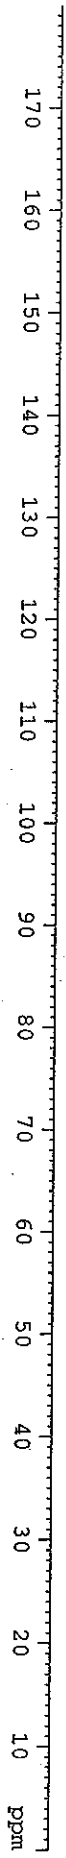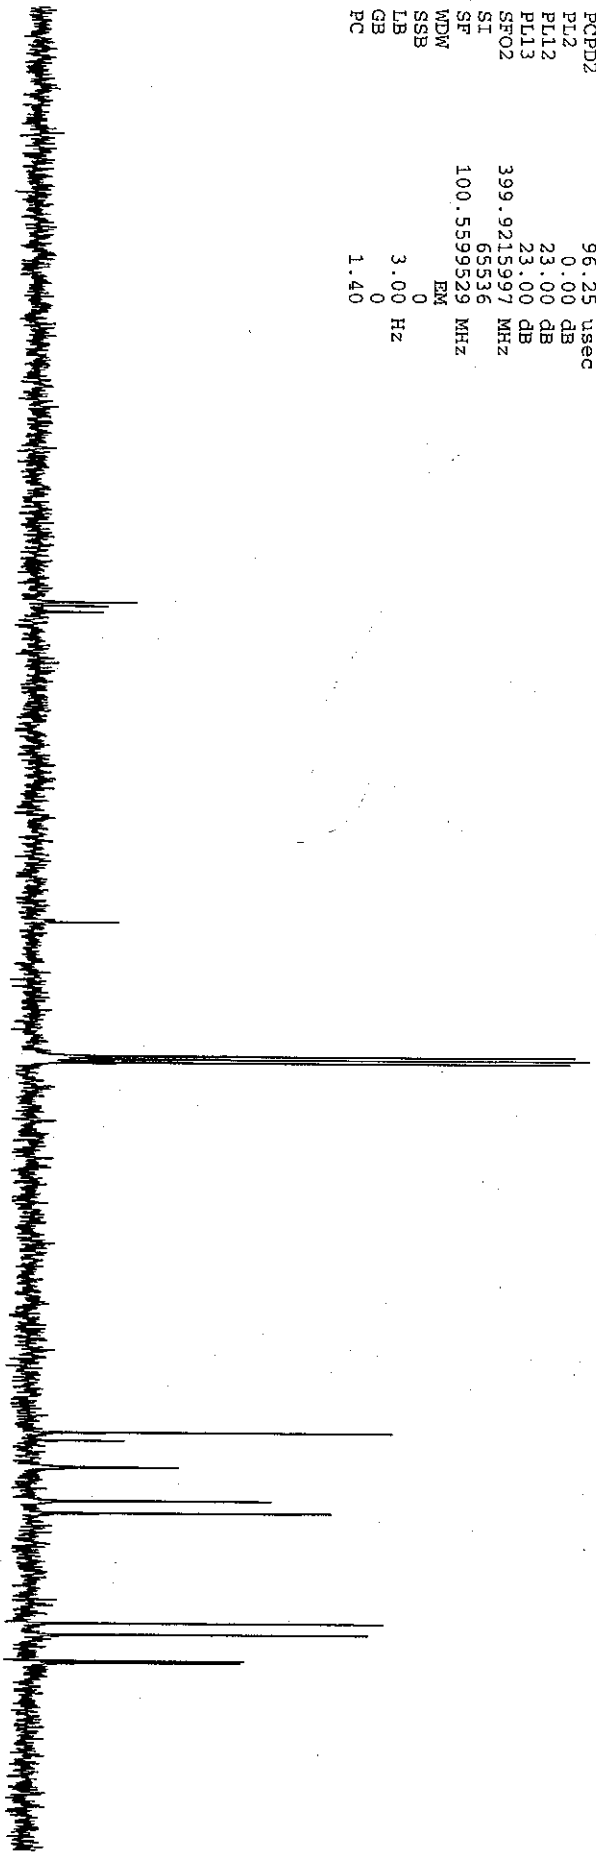

```

NAME          LJHCl-Exp174_1
EXPNO         1
PROCNO        1
Date_         20091208
Time          23.07
INSTRUM       spect
PROBHD        5 mm Multinucl
PULPROG       zg
TD            32768
SOLVENT       CDCl3
NS            12
DS            0
SWH           5995.204 Hz
FIDRES       0.182959 Hz
AQ           2.7329011 sec
RG           35.9
DM           83.400 usec
DE           6.00 usec
TE           333.3 K
D1           1.00000000 sec
TD0          1

===== CHANNEL f1 =====
NUC1          1H
P1           2.50 usec
PL1          0.00 dB
SFO1         399.9225995 MHz
SI           32768
SF           399.9200097 MHz
WDW          EM
SSB          0
LB           0.20 Hz
GB           0
PC           1.00
  
```

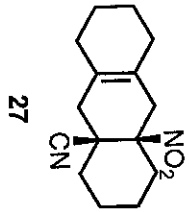

7.260

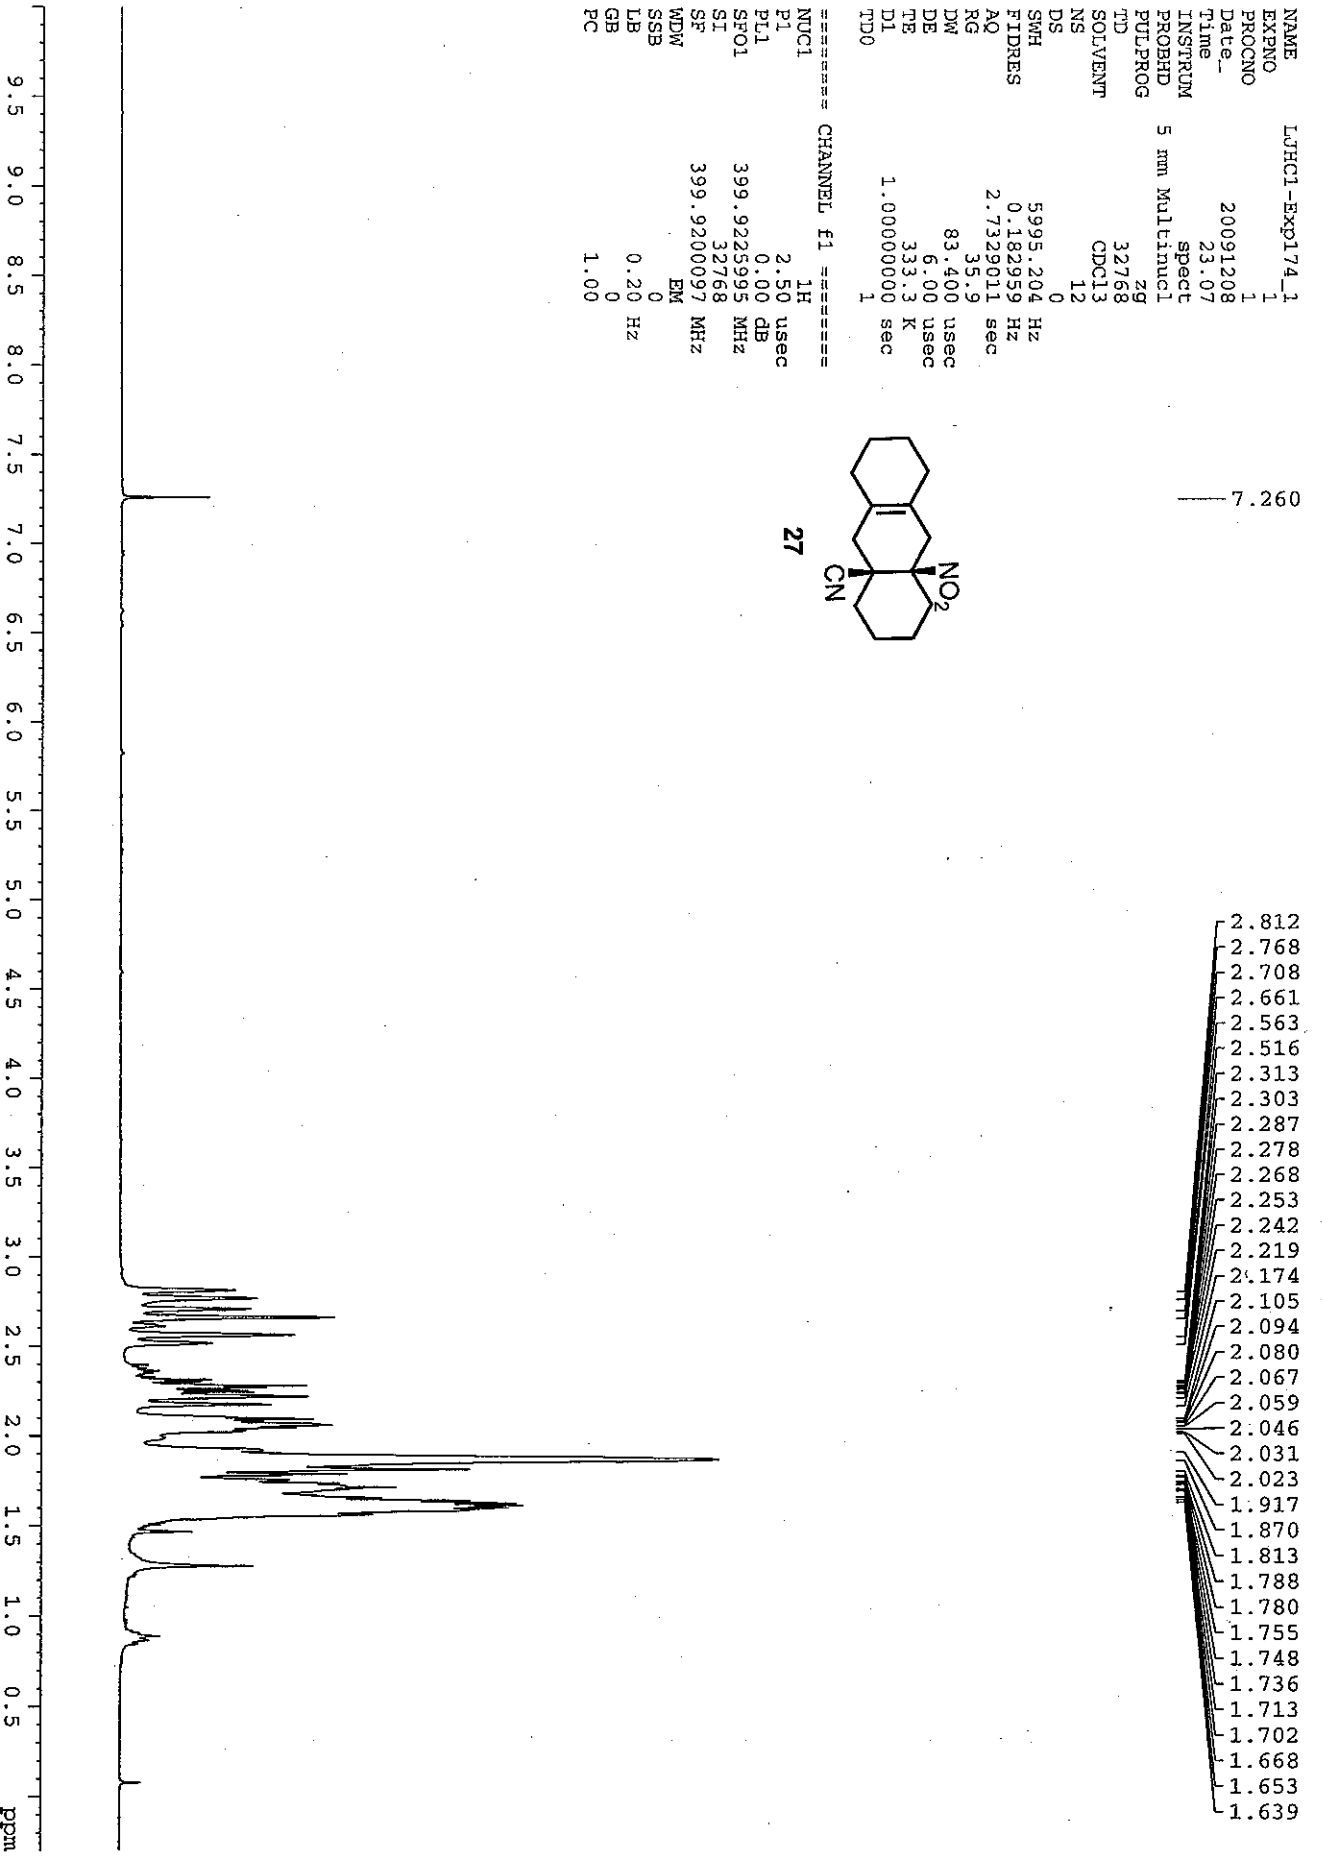

- 2.812
- 2.768
- 2.708
- 2.661
- 2.563
- 2.516
- 2.313
- 2.303
- 2.287
- 2.278
- 2.268
- 2.253
- 2.242
- 2.219
- 2.174
- 2.105
- 2.094
- 2.080
- 2.067
- 2.059
- 2.046
- 2.031
- 2.023
- 1.917
- 1.870
- 1.813
- 1.788
- 1.780
- 1.755
- 1.748
- 1.736
- 1.713
- 1.702
- 1.668
- 1.653
- 1.639

Current Data Parameters  
 NAME LJHC1-Exp174\_1  
 EXPNO 14  
 PROCNO 1

F2 - Acquisition Parameters  
 Date\_ 20091209  
 Time 22.46

INSTRUM spect  
 PROBD 5 mm Multinucl  
 PULPROG zgpg30  
 TD 30902  
 SOLVENT CDCl3  
 NS 7802  
 DS 0  
 SWH 22075.055 Hz  
 FIDRES 0.714357 Hz  
 AQ 0.6999803 sec  
 RG 16384  
 DW 22.650 usec  
 DE 6.00 usec  
 TE 333.2 K  
 D1 0.699999999 sec  
 d11 0.030000000 sec  
 DELTA 0.599999996 sec  
 TD0 1

==== CHANNEL F1 =====  
 NUC1 13C  
 P1 17.50 usec  
 PL1 -1.00 dB  
 SFO1 100.5699800 MHz

==== CHANNEL F2 =====  
 CPDPRG2 waltz16  
 NUC2 1H  
 PCPD2 96.25 usec  
 PL2 0.00 dB  
 PL12 23.00 dB  
 PL13 23.00 dB  
 SFO2 399.9215997 MHz

F2 - Processing parameters  
 SI 65536  
 SF 100.5599509 MHz  
 WDW EM  
 SSB 0  
 LB 3.00 Hz  
 GB 0  
 PC 1.40

124.165  
 123.138  
 121.492

90.374

77.318  
 77.001  
 76.683

39.677  
 39.444  
 36.095  
 33.952  
 32.800  
 29.719  
 29.494  
 29.325  
 22.640  
 22.080  
 20.986

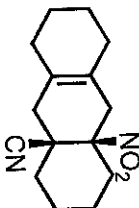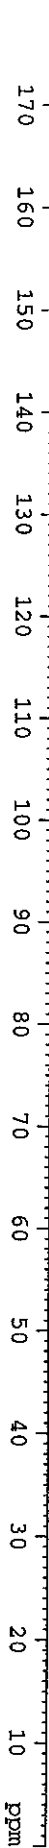

\* Kimw12 AS1\_4\_225 (10 1) CDCl3 24.0C July\_06,2009\_18:41:49 Bruker AVII+ 600MHz RFL1326: zg30 : 1H 7.500 ppm \*

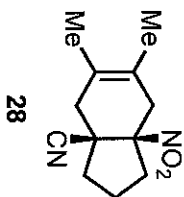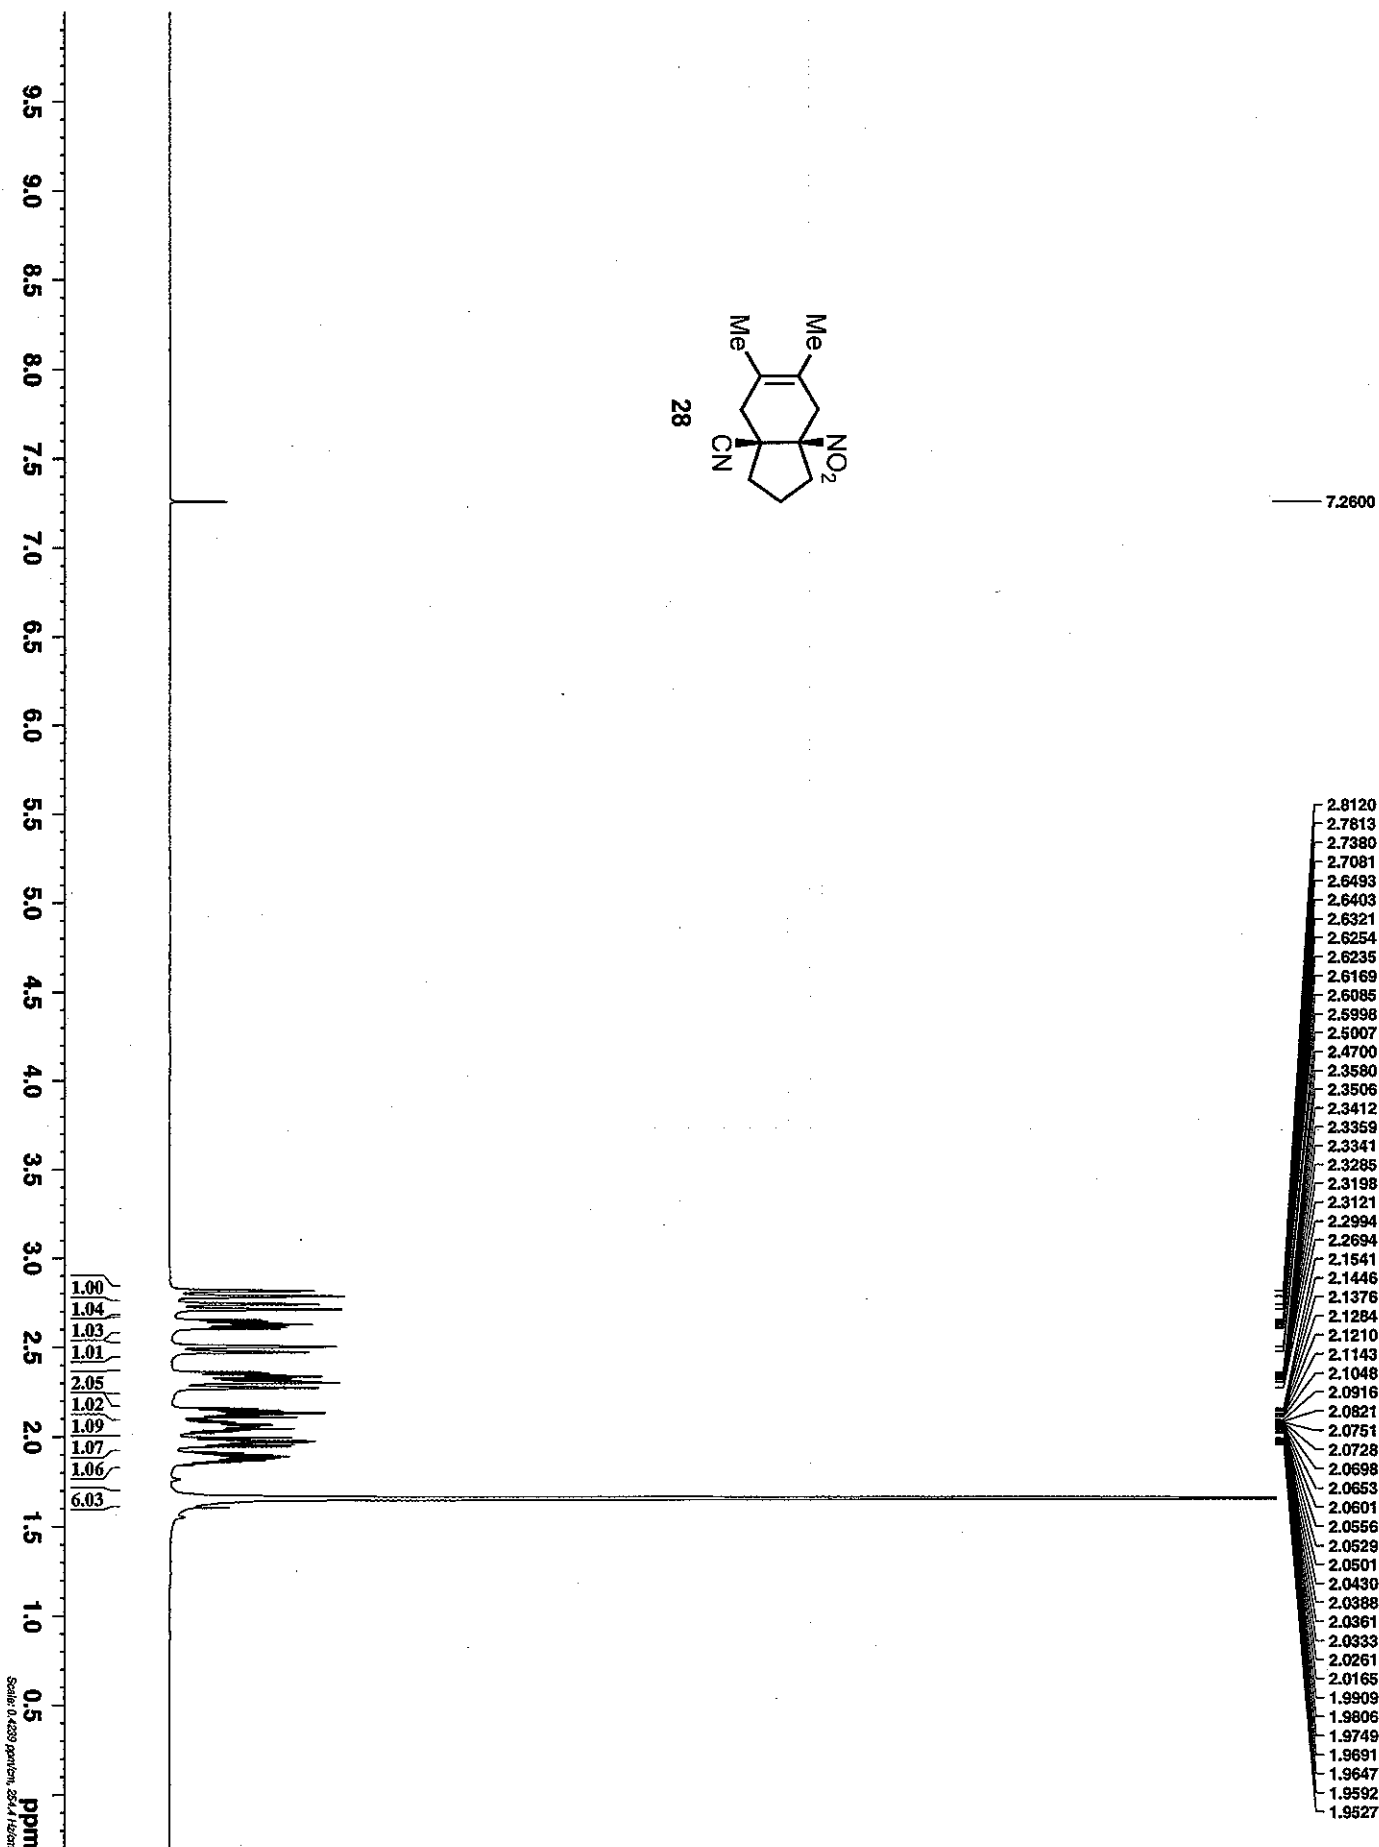



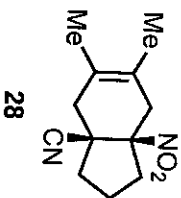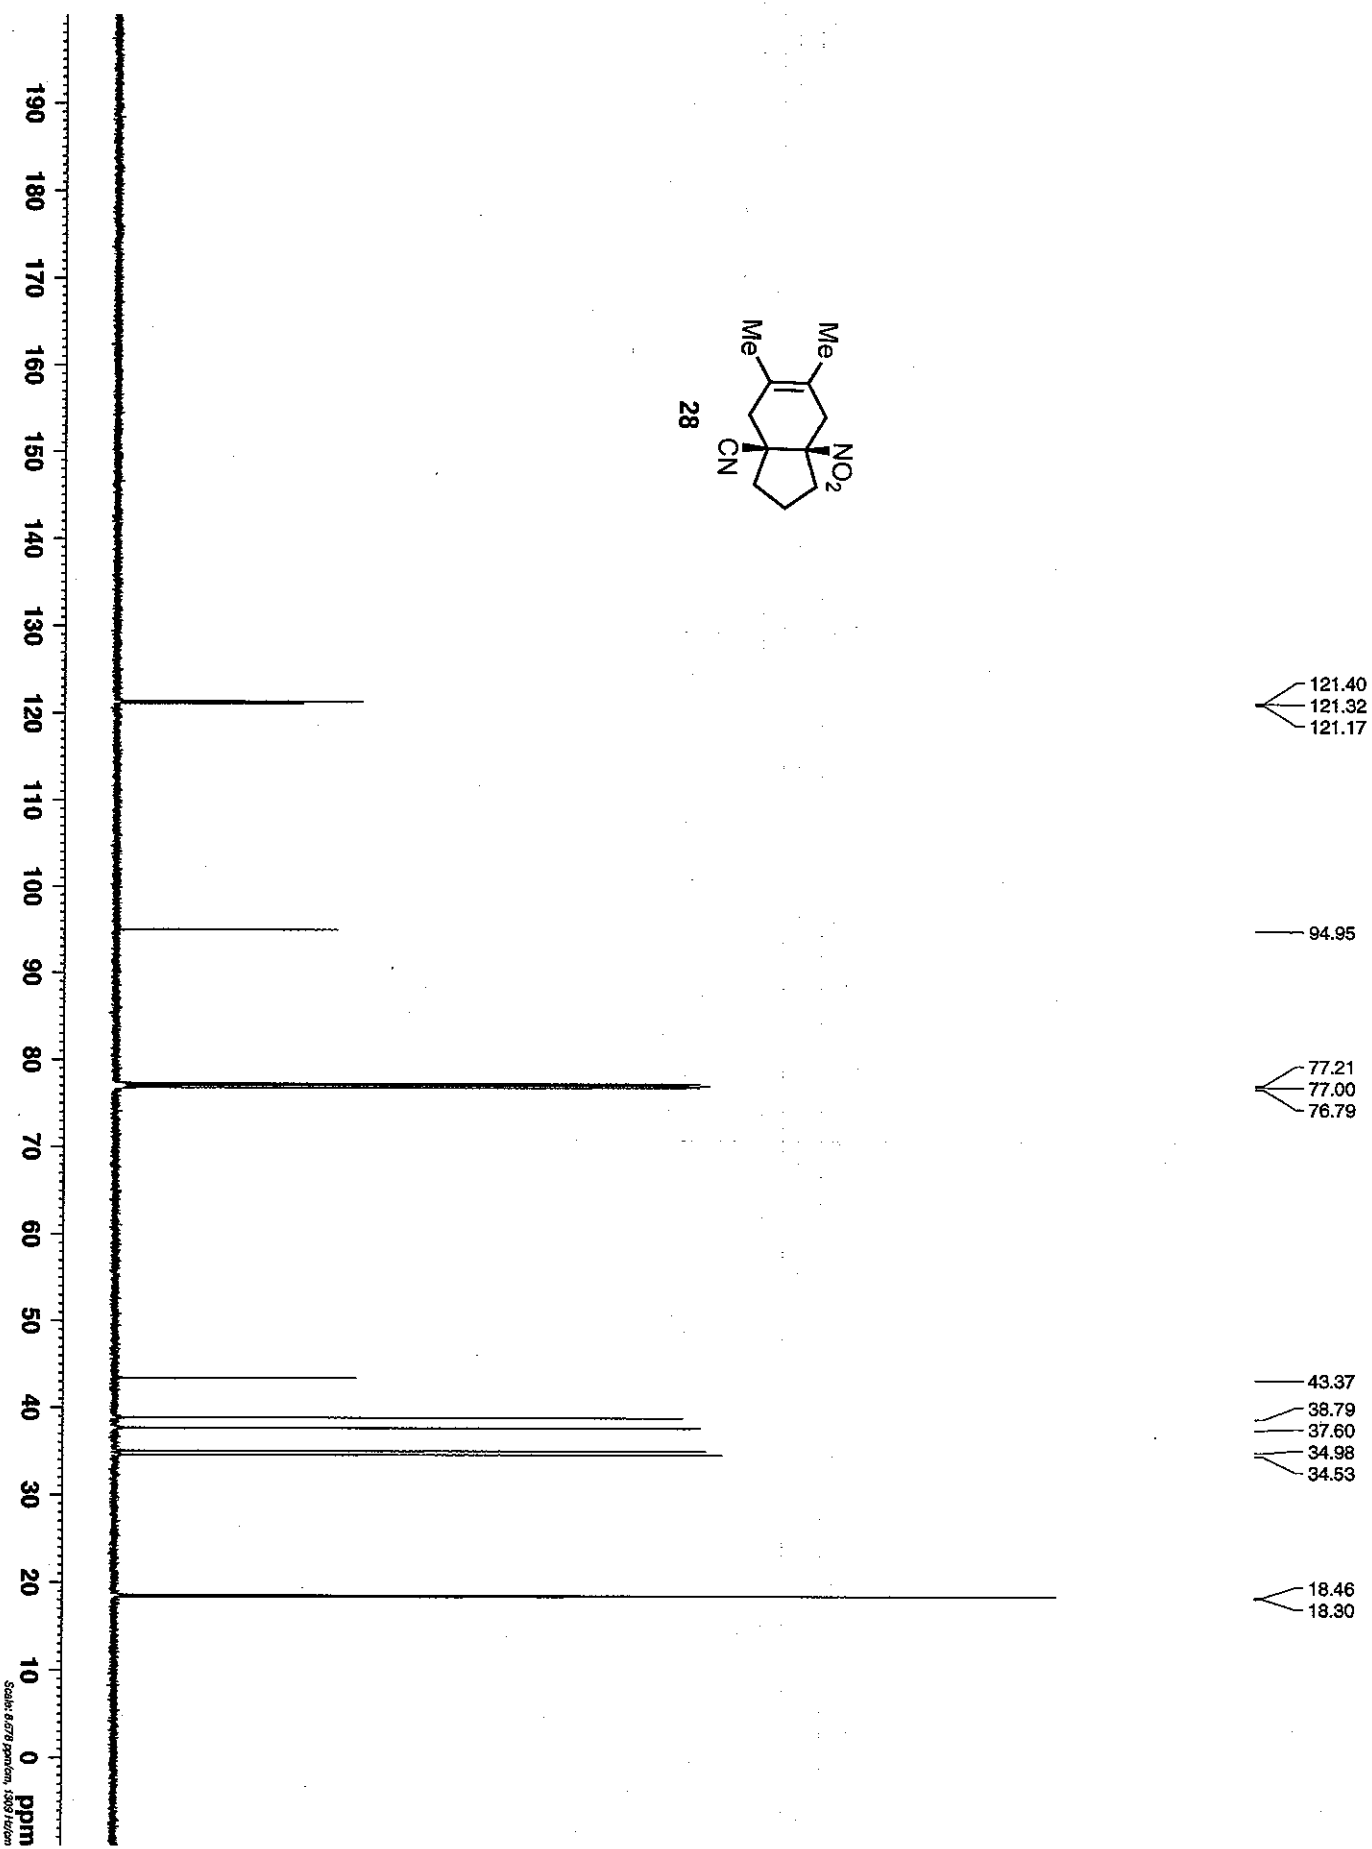

```

NAME          LJHCl-Exp163
EXPNO         3
PROCNO        1
Date_         20091208
Time          17.21
INSTRUM       5 mm Multinucl
PROBHD        spect
PULPROG       zg
TD            32768
SOLVENT       CDCl3
NS            12
DS            0
SWH           5995.204 Hz
FIDRES        0.182959 Hz
AQ            2.7329011 sec
RG            57
DE            83.400 usec
TE            300.0 K
D1            1.000000000 sec
TD0           1

===== CHANNEL f1 =====
NUC1          1H
P1            2.50 usec
PL1           0.00 dB
SFO1         399.9225995 MHz
SI           32768
SF           399.9200110 MHz
WDW           EM
SSB           0
LB            0.20 Hz
GB            0
PC            1.00

```

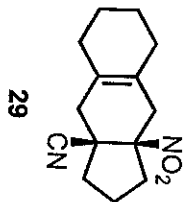

7.260

2.772  
2.727  
2.704  
2.675  
2.662  
2.651  
2.638  
2.627  
2.615  
2.603  
2.462  
2.417  
2.378  
2.369  
2.354  
2.345  
2.336  
2.325  
2.312  
2.252  
2.208  
2.188  
2.174  
2.164  
2.150  
2.139  
2.129  
2.119  
2.115  
2.086  
2.080  
2.068  
2.061  
2.054  
2.040  
2.031  
2.021  
1.999  
1.990  
1.984  
1.976  
1.966  
1.952  
1.943  
1.932

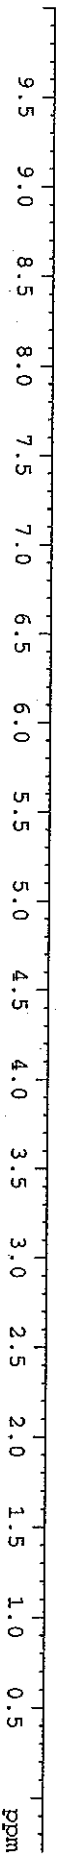

3.000  
1.060  
1.042  
0.969  
8.456  
4.084

NAME LJHCL-Exp163  
 EXPNO 13  
 PROCNO 1  
 Date\_ 20091117  
 Time 23.01  
 INSTRUM spect  
 PROBHD 5 mm Multinucl  
 PULPROG zgpg30  
 TD 30902  
 SOLVENT Acetone  
 NS 1056  
 DS 0  
 SWH 22075.055 Hz  
 FIDRES 0.714357 Hz  
 AQ 0.6999803 sec  
 RG 16384  
 DW 22.650 usec  
 DE 6.00 usec  
 TE 300.0 K  
 D1 0.59999999 sec  
 d11 0.03000000 sec  
 DELTA 0.59999996 sec  
 TD0 1

===== CHANNEL f1 =====  
 NUCL1 13C  
 P1 17.50 usec  
 PL1 -1.00 dB  
 SFO1 100.5699800 MHz

===== CHANNEL f2 =====  
 CPDPRG2 waltz16  
 NUCL2 1H  
 PCPD2 96.25 usec  
 PL2 0.00 dB  
 PL12 23.00 dB  
 PL13 23.00 dB  
 SFO2 399.9215997 MHz  
 SI 65536  
 SF 100.5599673 MHz  
 WDW EM  
 SSB 0  
 LB 3.00 Hz  
 GB 0  
 PC 1.40

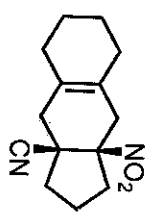

- 123.649
- 123.541
- 121.261
- 94.833
- 77.317
- 77.000
- 76.682
- 43.165
- 37.757
- 36.590
- 34.965
- 34.485
- 29.341
- 29.192
- 22.537
- 22.483
- 18.415

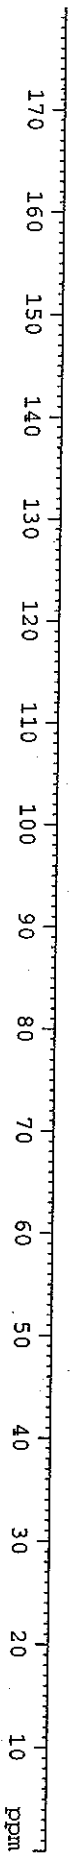

```

NAME          LJHCl-Exp146
EXPNO         1
PROCNO        1
Date_         20091105
Time          0.36
INSTRUM       spect
PROBHD        5 mm Multinucl
PULPROG       zg
TD            32768
SOLVENT       CDCl3
NS            12
DS            0
SWH           5995.204 Hz
FIDRES        0.182959 Hz
AQ           2.7329011 sec
RG           35.9
DM           83.400 usec
DE           6.00 usec
TE           300.0 K
D1           1.00000000 sec
TD0          1
===== CHANNEL f1 =====
NUC1          1H
P1           2.50 usec
PL1          0.00 dB
SFO1         399.9225995 MHz
SI           32768
SF           399.9200116 MHz
WDW          EM
SSB          0
LB           0.20 Hz
GB           0
PC           1.00

```

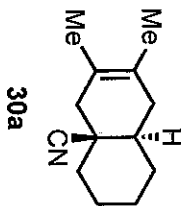

— 7.260

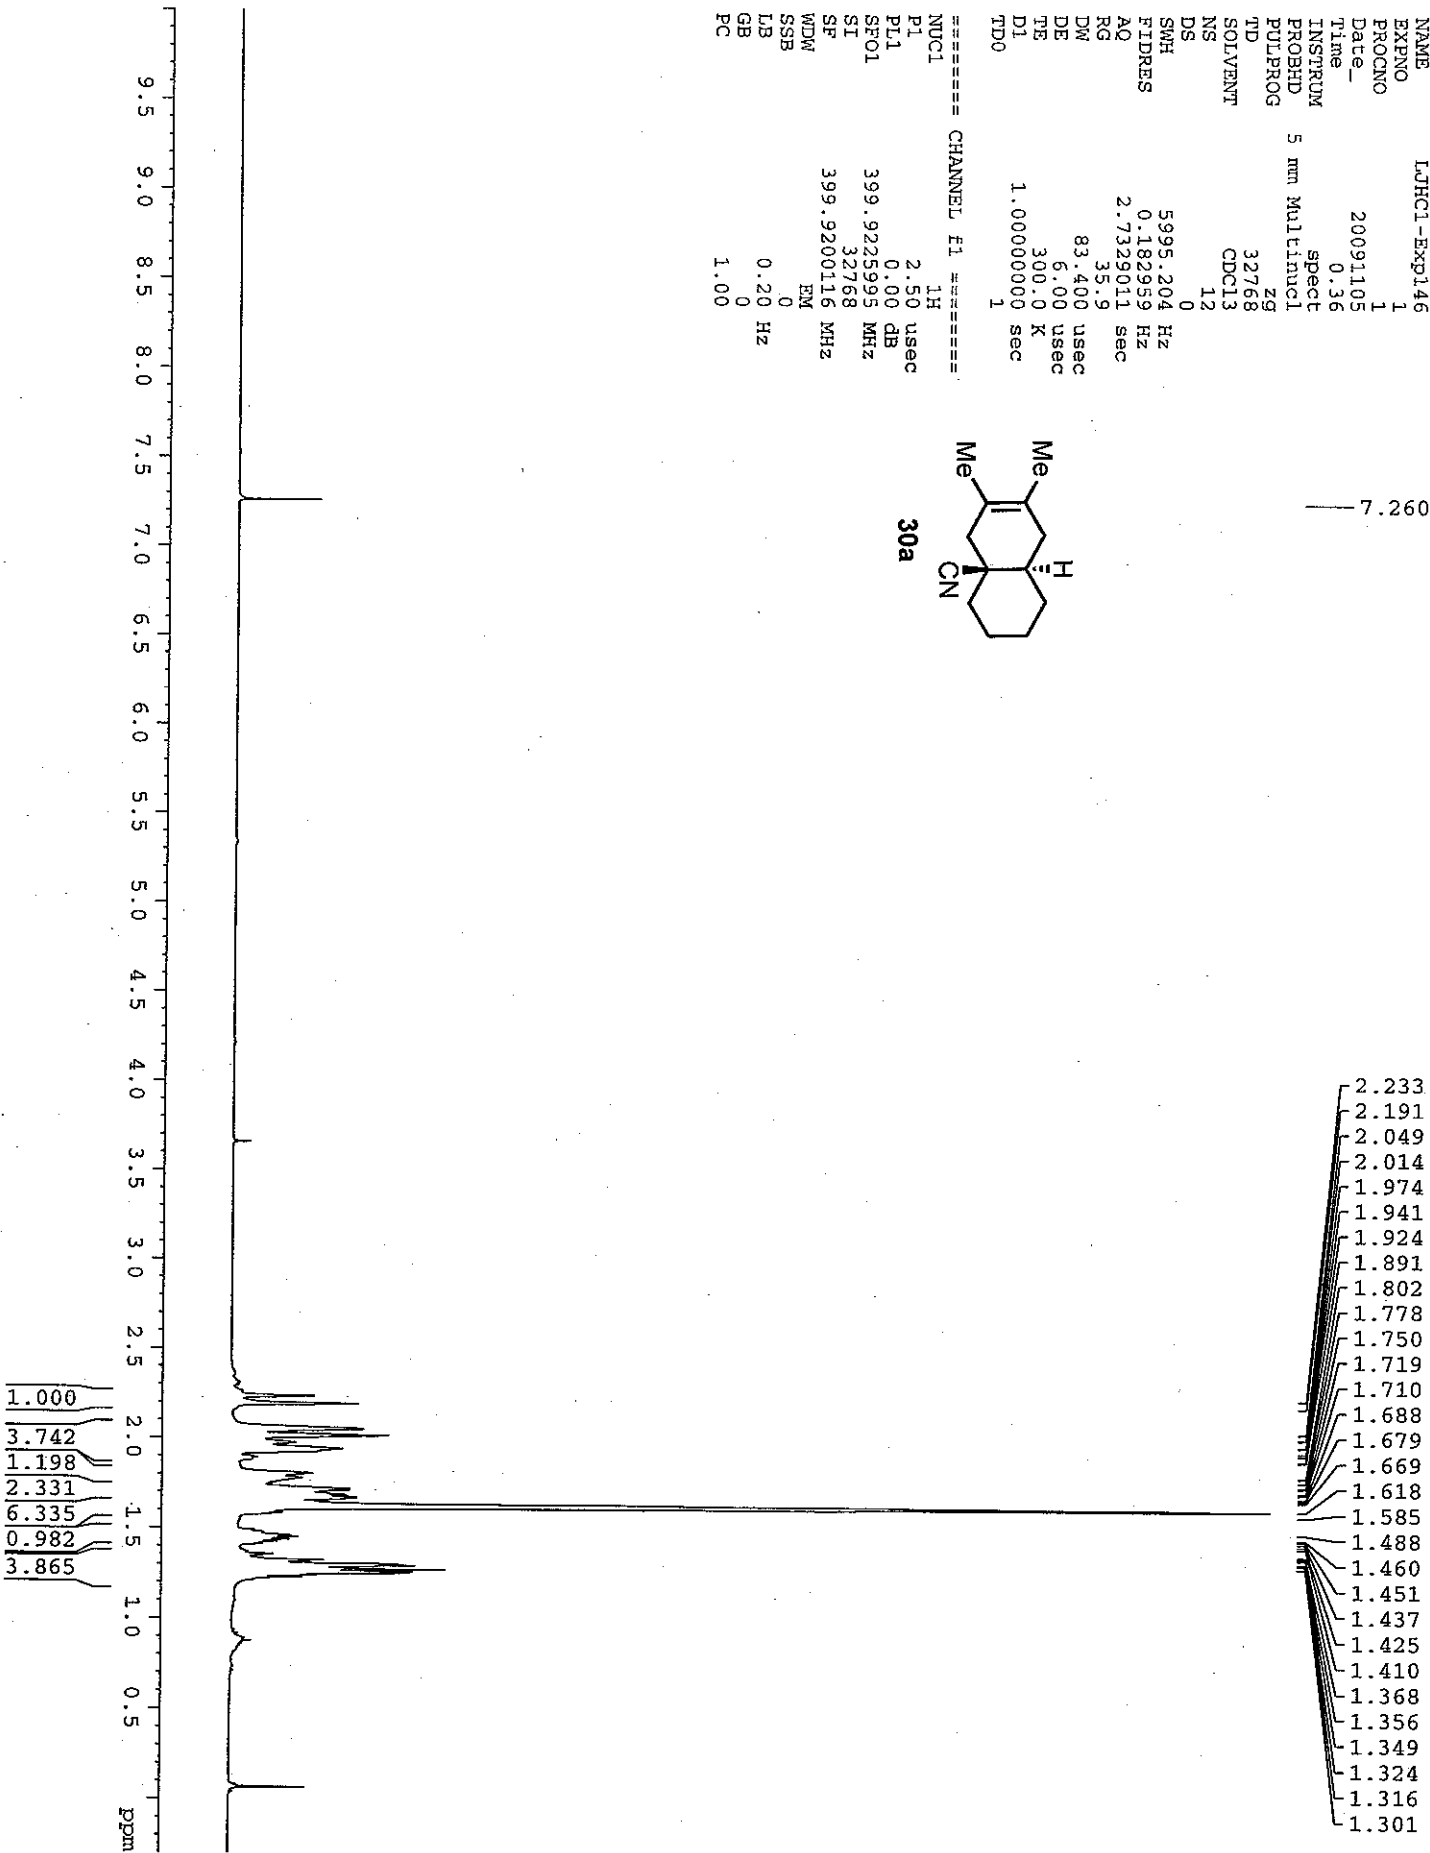

NAME LJHCl-Exp146

EXPNO 13  
PROCNO 1  
Date\_ 20091105  
Time 0.39  
INSTRUM spect  
PROBHD 5 mm Multinucl  
PULPROG zgpg30  
TD 30902  
SOLVENT Aceton  
NS 601  
DS 0

SWH 22075.055 Hz  
FIDRES 0.714357 Hz  
AQ 0.6999803 sec  
RG 16384  
DW 22.650 usec  
DE 6.00 usec  
TE 300.0 K  
D1 0.69999999 sec  
d11 0.03000000 sec  
DELTA 0.59999996 sec  
TD0 1

==== CHANNEL F1 =====  
NUC1 13C  
P1 17.50 usec  
PL1 -1.00 dB  
SFO1 100.5699800 MHz

==== CHANNEL F2 =====  
CPDPRG2 waltz16  
NUC2 1H  
PCPD2 96.25 usec  
PL2 0.00 dB  
PL12 23.00 dB  
PL13 23.00 dB  
SFO2 399.9215997 MHz  
SI 65536  
SF 100.5599682 MHz  
WDW EM  
SSB 0  
LB 3.00 Hz  
GB 0  
PC 1.40

125.785  
122.642  
121.898

77.318  
77.000  
76.683

43.249  
39.899  
39.560  
36.932  
36.634  
29.924  
25.485  
23.127  
18.673  
18.584

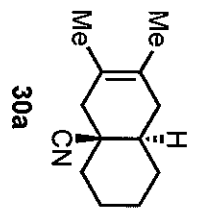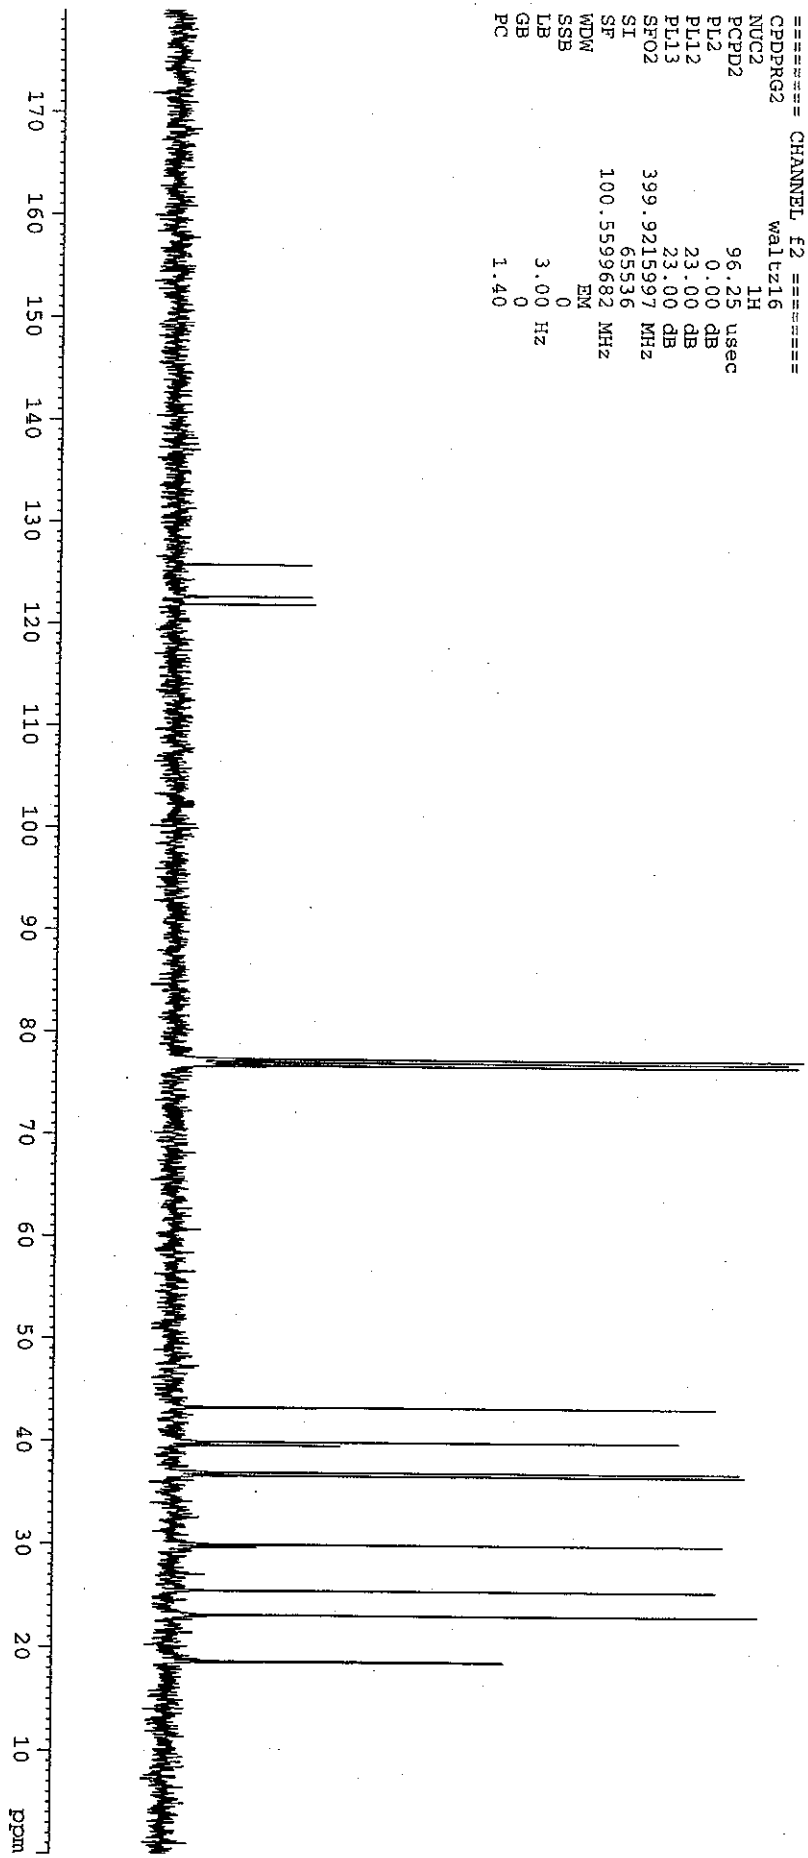

```

NAME          L/HCl-Exp158
EXPNO         1
PROCNO        1
Date_         20091117
Time          23.54
INSTRUM       5 mm Multinucl
PROBHD        spect
PULPROG       zg
TD            32768
SOLVENT       D2O
NS            12
DS            0
SWH           5995.204 Hz
FIDRES        0.182959 Hz
AQ            2.7329011 sec
RG            50.8
DE            83.400 usec
TE            300.0 K
D1            1.00000000 sec
TD0           1

===== CHANNEL f1 =====
NUC1          1H
P1            2.50 usec
PL1           0.00 dB
SFO1         399.9225995 MHz
SI           32768
SF           399.9200112 MHz
WDW           EM
SSB           0
LB            0.20 Hz
GB            0
PC            1.00

```

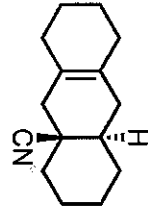

7.260

- 2.172
- 2.130
- 2.047
- 2.013
- 2.005
- 1.995
- 1.950
- 1.875
- 1.857
- 1.831
- 1.789
- 1.750
- 1.723
- 1.715
- 1.694
- 1.685
- 1.668
- 1.654
- 1.620
- 1.579
- 1.571
- 1.549
- 1.528
- 1.504
- 1.498
- 1.491
- 1.483
- 1.475
- 1.462
- 1.448
- 1.369

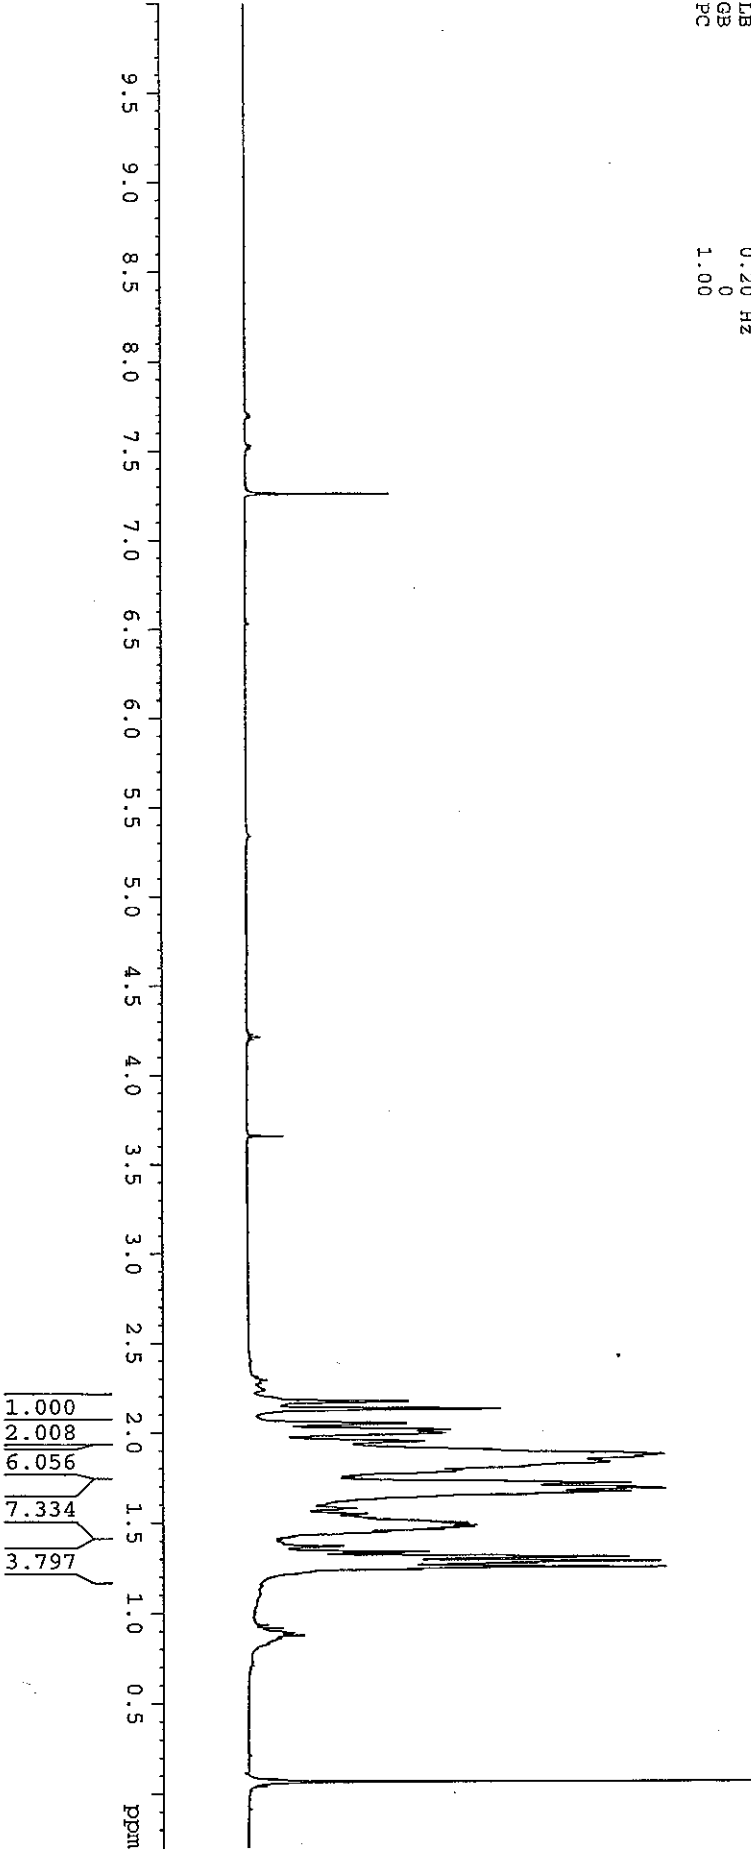

NAME LJHCl-Exp158  
 EXPNO 13  
 PROCNO 1  
 Date\_ 20091118  
 Time 0.10  
 INSTRUM spect  
 PROBHD 5 mm Multinucl  
 PULPROG zgpg30  
 TD 30902  
 SOLVENT Aceton  
 NS 708  
 DS 0  
 SWH 22075.055 Hz  
 FIDRES 0.714357 Hz  
 AQ 0.6999803 sec  
 RG 16384  
 DW 22.650 usec  
 DE 6.00 usec  
 TE 300.0 K  
 D1 0.69999999 sec  
 d11 0.03000000 sec  
 DELTA 0.59999996 sec  
 TDO 1

===== CHANNEL F1 =====  
 NUCL1 13C  
 P1 17.50 usec  
 PL1 -1.00 dB  
 SFO1 100.5699800 MHz

===== CHANNEL F2 =====  
 CPDPRG2 waltz16  
 NUCL2 1H  
 PCPD2 96.25 usec  
 PL2 0.00 dB  
 PL12 23.00 dB  
 PL13 23.00 dB  
 SFO2 399.9215997 MHz  
 SI 65536  
 SF 100.5599683 MHz  
 WDM RM  
 SSB 0  
 LB 3.00 Hz  
 GB 0  
 PC 1.40

128.042  
 124.290  
 122.694

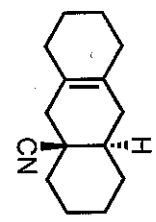

77.318  
 77.000  
 76.682

42.109  
 39.821  
 39.440  
 36.781  
 35.681  
 30.036  
 29.720  
 29.627  
 25.541  
 23.159  
 22.853  
 22.738

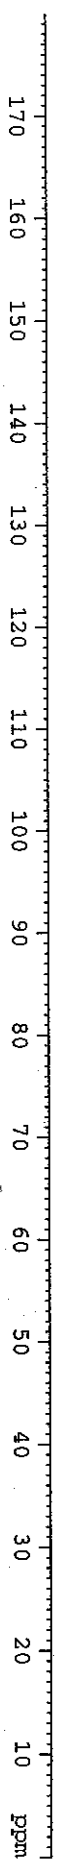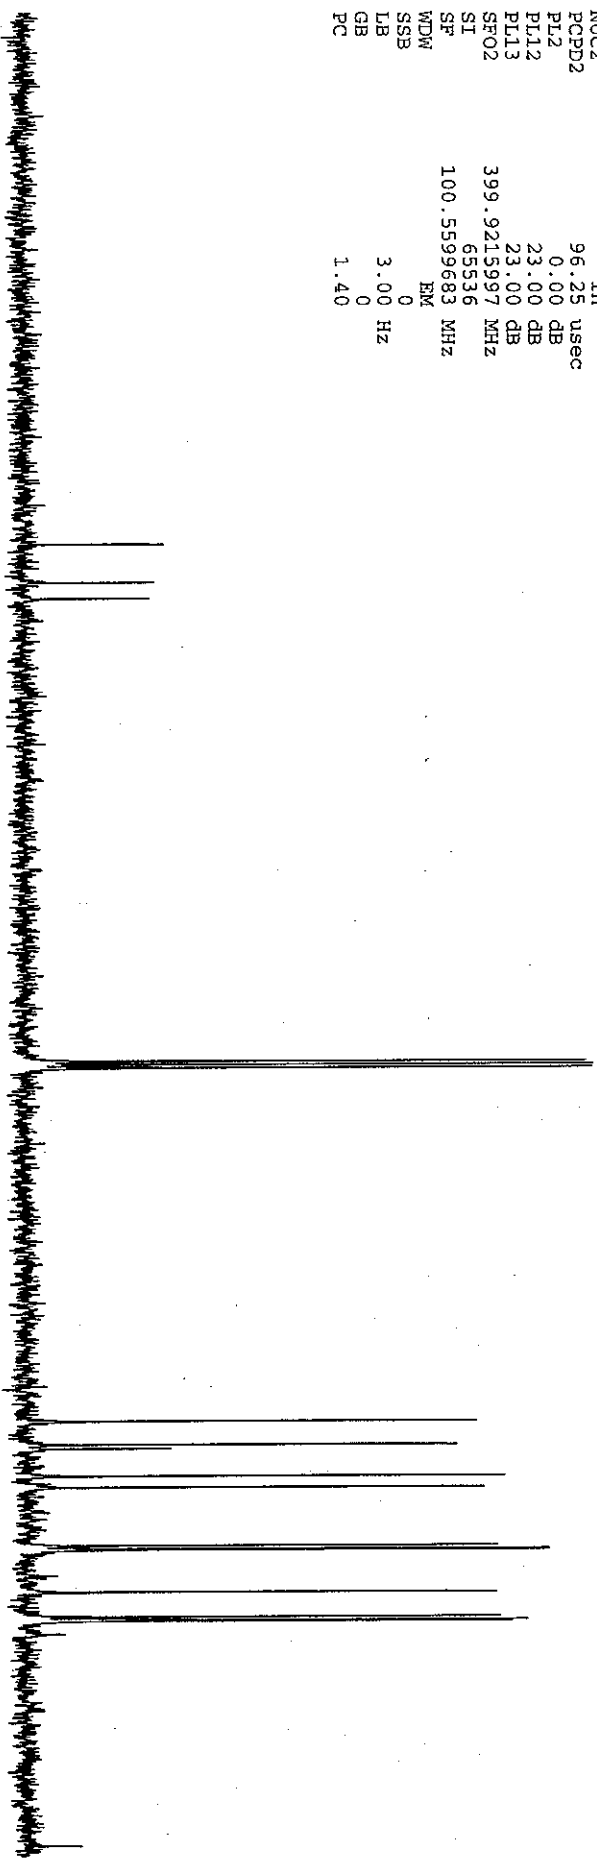

\* Kimw12 AS1\_4\_229 (10 1) CDCl3 24.0C July\_07.2009\_18:51:13 Bruker AVII+ 600MHz RRL1326: zg30 : 1H 7.500 ppm \*

- 7.1967
- 2.3968
- 2.3693
- 2.2896
- 2.2815
- 2.2668
- 2.2127
- 2.2088
- 2.1986
- 2.1944
- 2.1912
- 2.1873
- 2.1771
- 2.1730
- 2.1487
- 2.0855
- 2.0759
- 2.0529
- 2.0469
- 2.0133
- 2.0023
- 1.9976
- 1.9923
- 1.9862
- 1.9803
- 1.9776
- 1.9655
- 1.8947
- 1.8896
- 1.8872
- 1.8824
- 1.8716
- 1.8681
- 1.8651
- 1.8600
- 1.8538
- 1.8488
- 1.8459
- 1.8388
- 1.8341
- 1.8243
- 1.8203
- 1.8121
- 1.8035
- 1.7996
- 1.7911
- 1.7862
- 1.7775
- 1.7724
- 1.7633
- 1.7571
- 1.7503
- 1.7425
- 1.7403
- 1.7355
- 1.7266
- 1.7224
- 1.7206
- 1.7185
- 1.7147
- 1.7106
- 1.7065
- 1.7033
- 1.6990
- 1.6938
- 1.6918
- 1.6886
- 1.6846
- 1.6772
- 1.6013
- 1.5778
- 1.5571
- 1.5532
- 1.5466
- 1.5358
- 1.5220
- 1.4898
- 1.4834
- 1.4779
- 1.4719
- 1.4679
- 1.4574
- 1.4529
- 1.4502
- 1.4393
- 1.4376
- 1.4357
- 1.4304
- 1.4193
- 1.3442
- 1.3382
- 1.3299
- 1.3247
- 1.3225
- 1.3152
- 1.3091

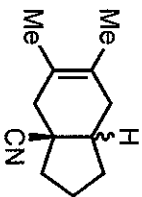

32a/32b = 1.5:1

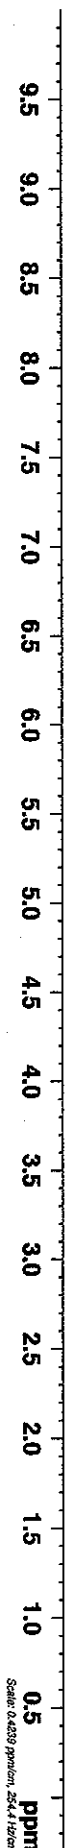

Scale: 0.439 ppm/cm, 254.4 Hz/cm



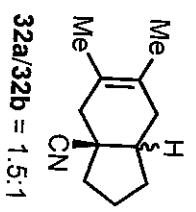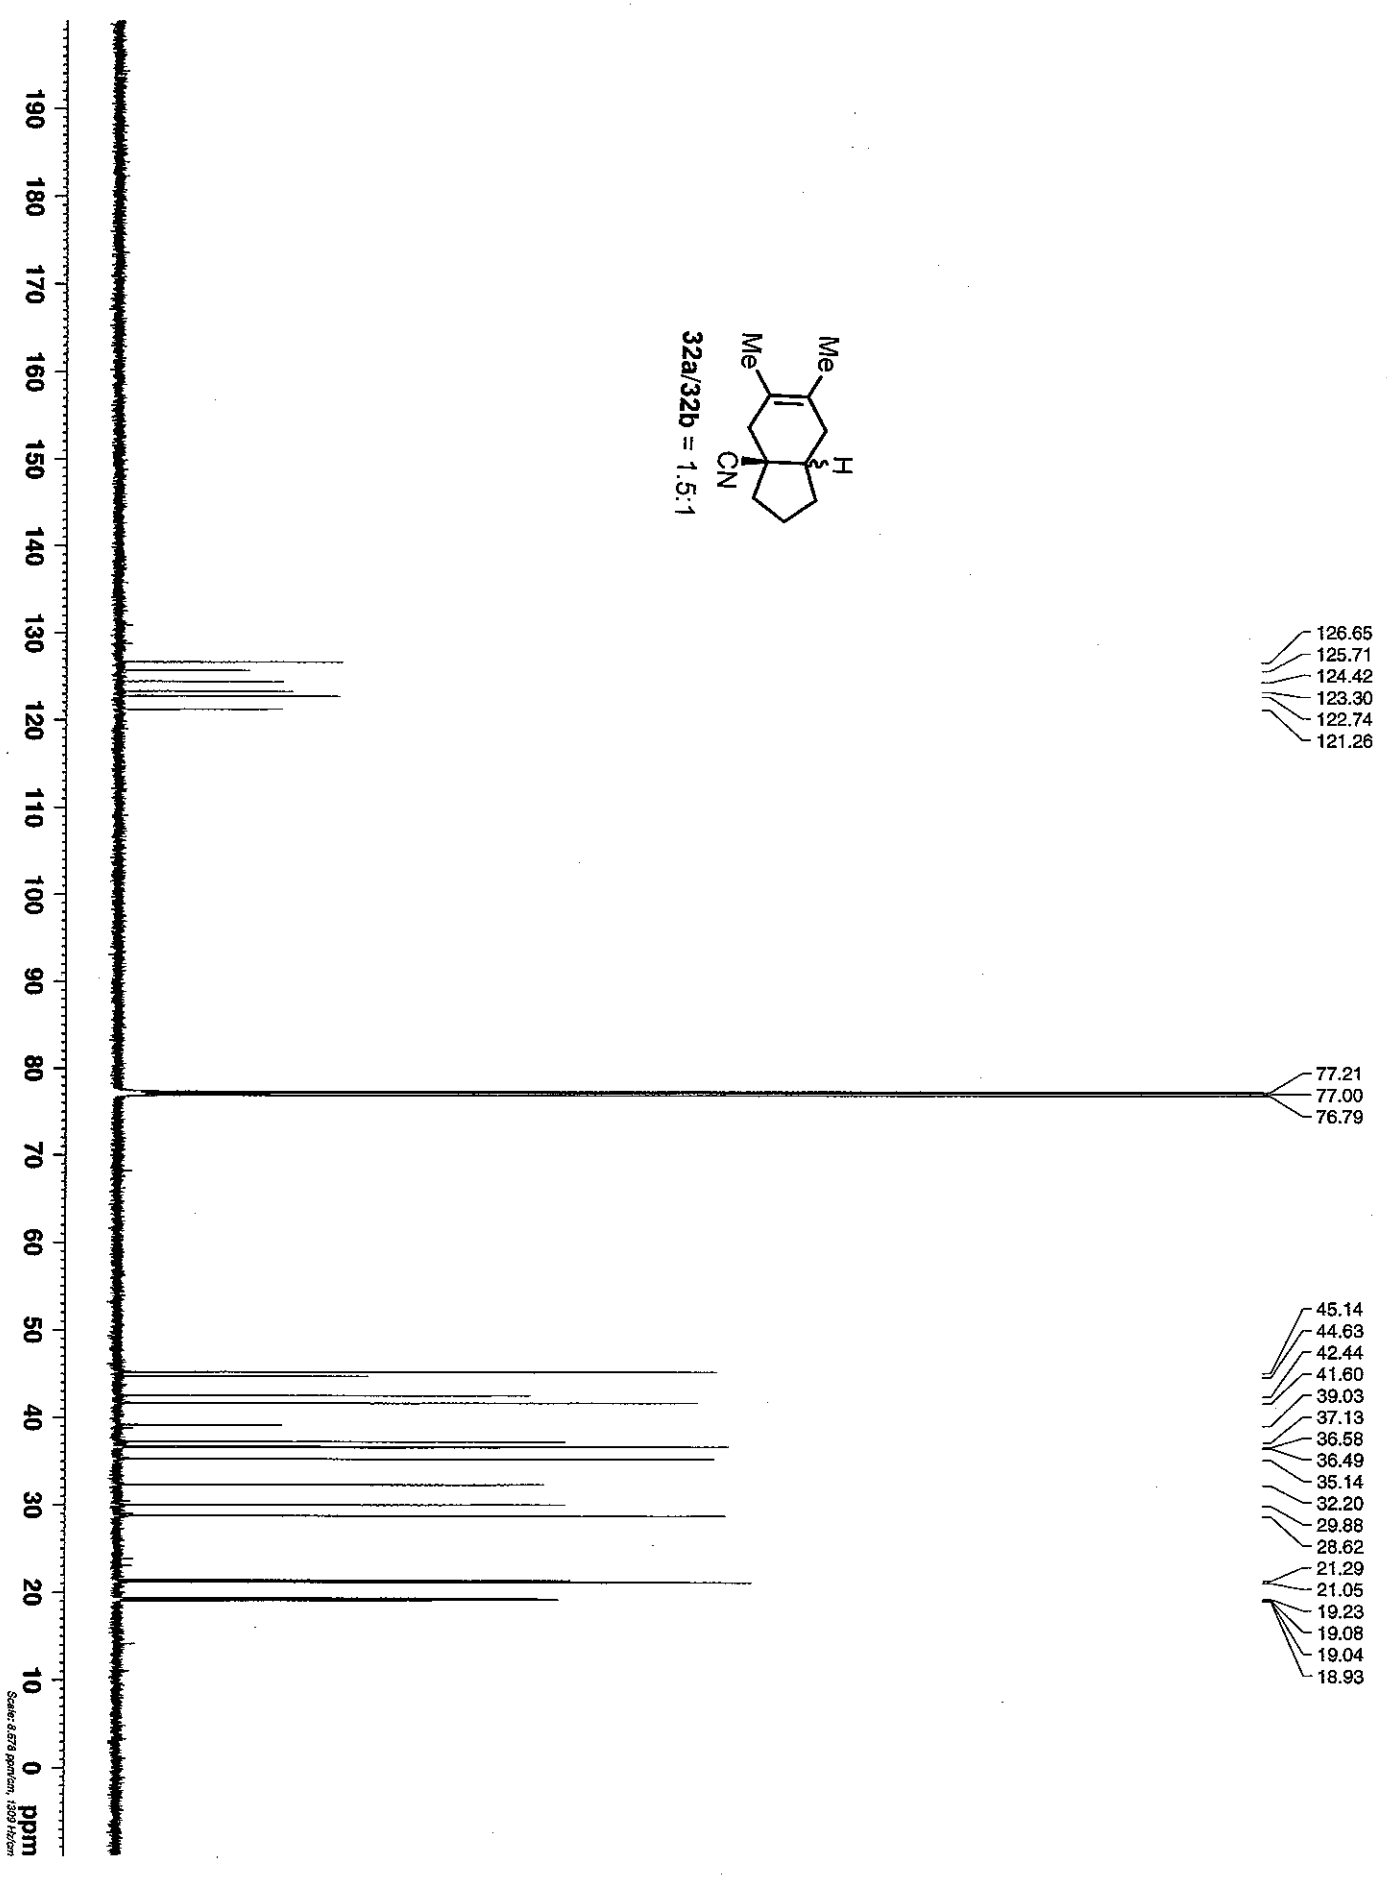

7.260  
2.404  
2.363  
2.287  
2.271  
2.265  
2.261  
2.255  
2.240  
2.233  
2.075  
2.067  
2.059  
2.051  
2.038  
2.019  
1.989  
1.974  
1.967  
1.962  
1.956  
1.952  
1.944  
1.934  
1.929  
1.913  
1.906  
1.897  
1.890  
1.884  
1.872  
1.851  
1.837  
1.830  
1.822  
1.815  
1.805  
1.802  
1.794  
1.786  
1.782  
1.771  
1.762  
1.753  
1.746  
1.731  
1.714  
1.703  
1.694  
1.688  
1.668  
1.664  
1.648  
1.638  
1.633  
1.623  
1.608  
1.584  
1.578  
1.571  
1.559  
1.549  
1.539  
1.534  
1.530  
1.522  
1.517  
1.512  
1.500  
1.490  
1.471  
1.449

```

NAME          LJHD-Exp2
EXPNO         1
PROCNO        1
Date_         20091214
Time          0.38
INSTRUM       5 mm Multinuc1
PROBHD        spect
PULPROG       zg
TD             32768
SOLVENT       CDCl3
NS            12
DS            0
SMH           5995.204 Hz
FIDRES        0.182959 Hz
AQ            2.7329041 sec
RG            71.8
DW            83.400 usec
DE            6.00 usec
TE            300.1 K
D1            1.00000000 sec
TDO           1
  
```

```

===== CHANNEL F1 =====
NUC1          1H
P1            2.50 usec
PL1           0.00 dB
SFO1          399.9225995 MHz
SI            32768
SF            399.9200112 MHz
WDW           EM
SSB           0
LB            0.20 Hz
GB            0
PC            1.00
  
```

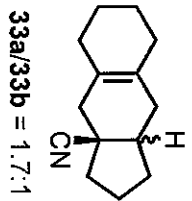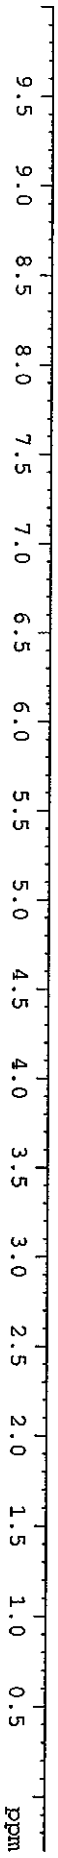

5.000  
20.896  
12.896

```

NAME          LJHD-Exp2
EXPNO         14
PROCNO        1
Date_         20091214
Time          1.48
INSTRUM       spect
PROBHD        5 mm Multinucl
PULPROG       zgpg30
TD            30902
SOLVENT       Acetone
NS            14378
DS            0
SMH           22075.055 Hz
FIDRES        0.714357 Hz
AQ            0.6999803 sec
RG            16384
DW            22.650 usec
DE            6.00 usec
TE            300.0 K
D1            0.69999999 sec
d11           0.03000000 sec
DELTA         0.59999996 sec
TD0           1
  
```

```

===== CHANNEL f1 =====
NUC1          13C
P1            17.50 usec
PL1          -1.00 dB
SF01         100.5699800 MHz
  
```

```

===== CHANNEL f2 =====
CPDPRG2      waltz16
NUC2          1H
PCPD2        96.25 usec
PL2          0.00 dB
PL12         23.00 dB
PL13         23.00 dB
SF02         399.9215997 MHz
SI           65536
SF           100.5599681 MHz
WDW          EM
SSB          0
LB           3.00 Hz
GB           0
PC           1.40
  
```

- 128.936
- 126.391
- 125.688
- 125.170
- 123.413
- 123.334

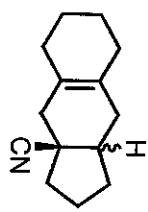

33a/33b = 1.7:1

- 77.317
- 76.999
- 76.682

- 45.011
- 44.458
- 42.181
- 40.540
- 38.776
- 37.065
- 36.641
- 35.225
- 33.991
- 30.793
- 30.314
- 30.207
- 30.089
- 29.921
- 29.718
- 28.628
- 22.942
- 22.873
- 22.751
- 21.099
- 21.009

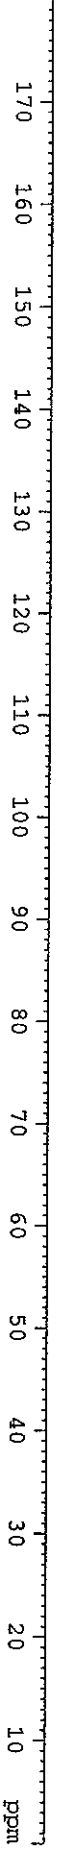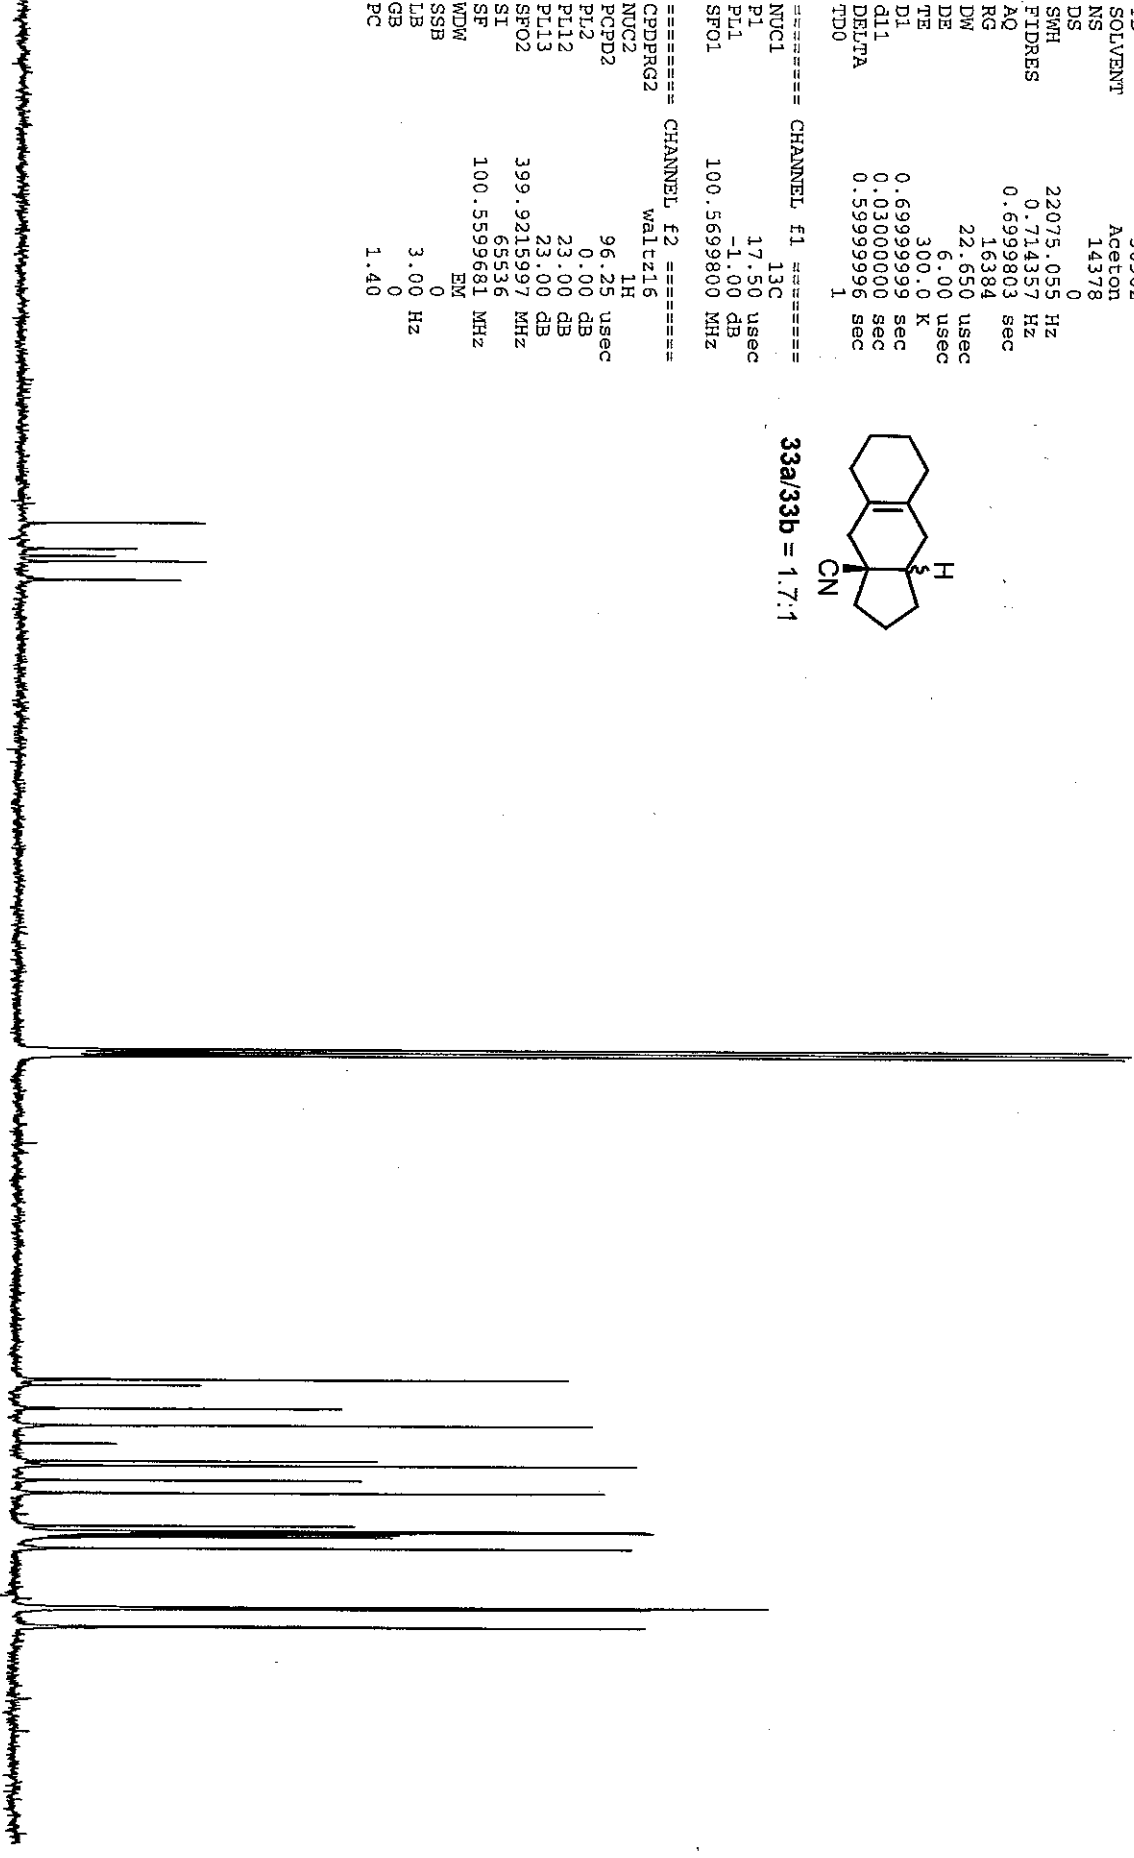

\* faszinhb BA-II-200 redo (10 1) CDCI3 24.0C December\_21\_2009\_15:29:34 Bruker AVIII 600MHz RRL1326: zg30 : 1H 7.500 ppm \*

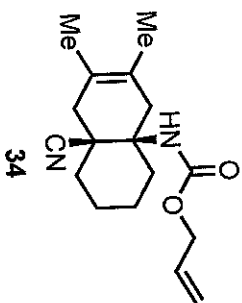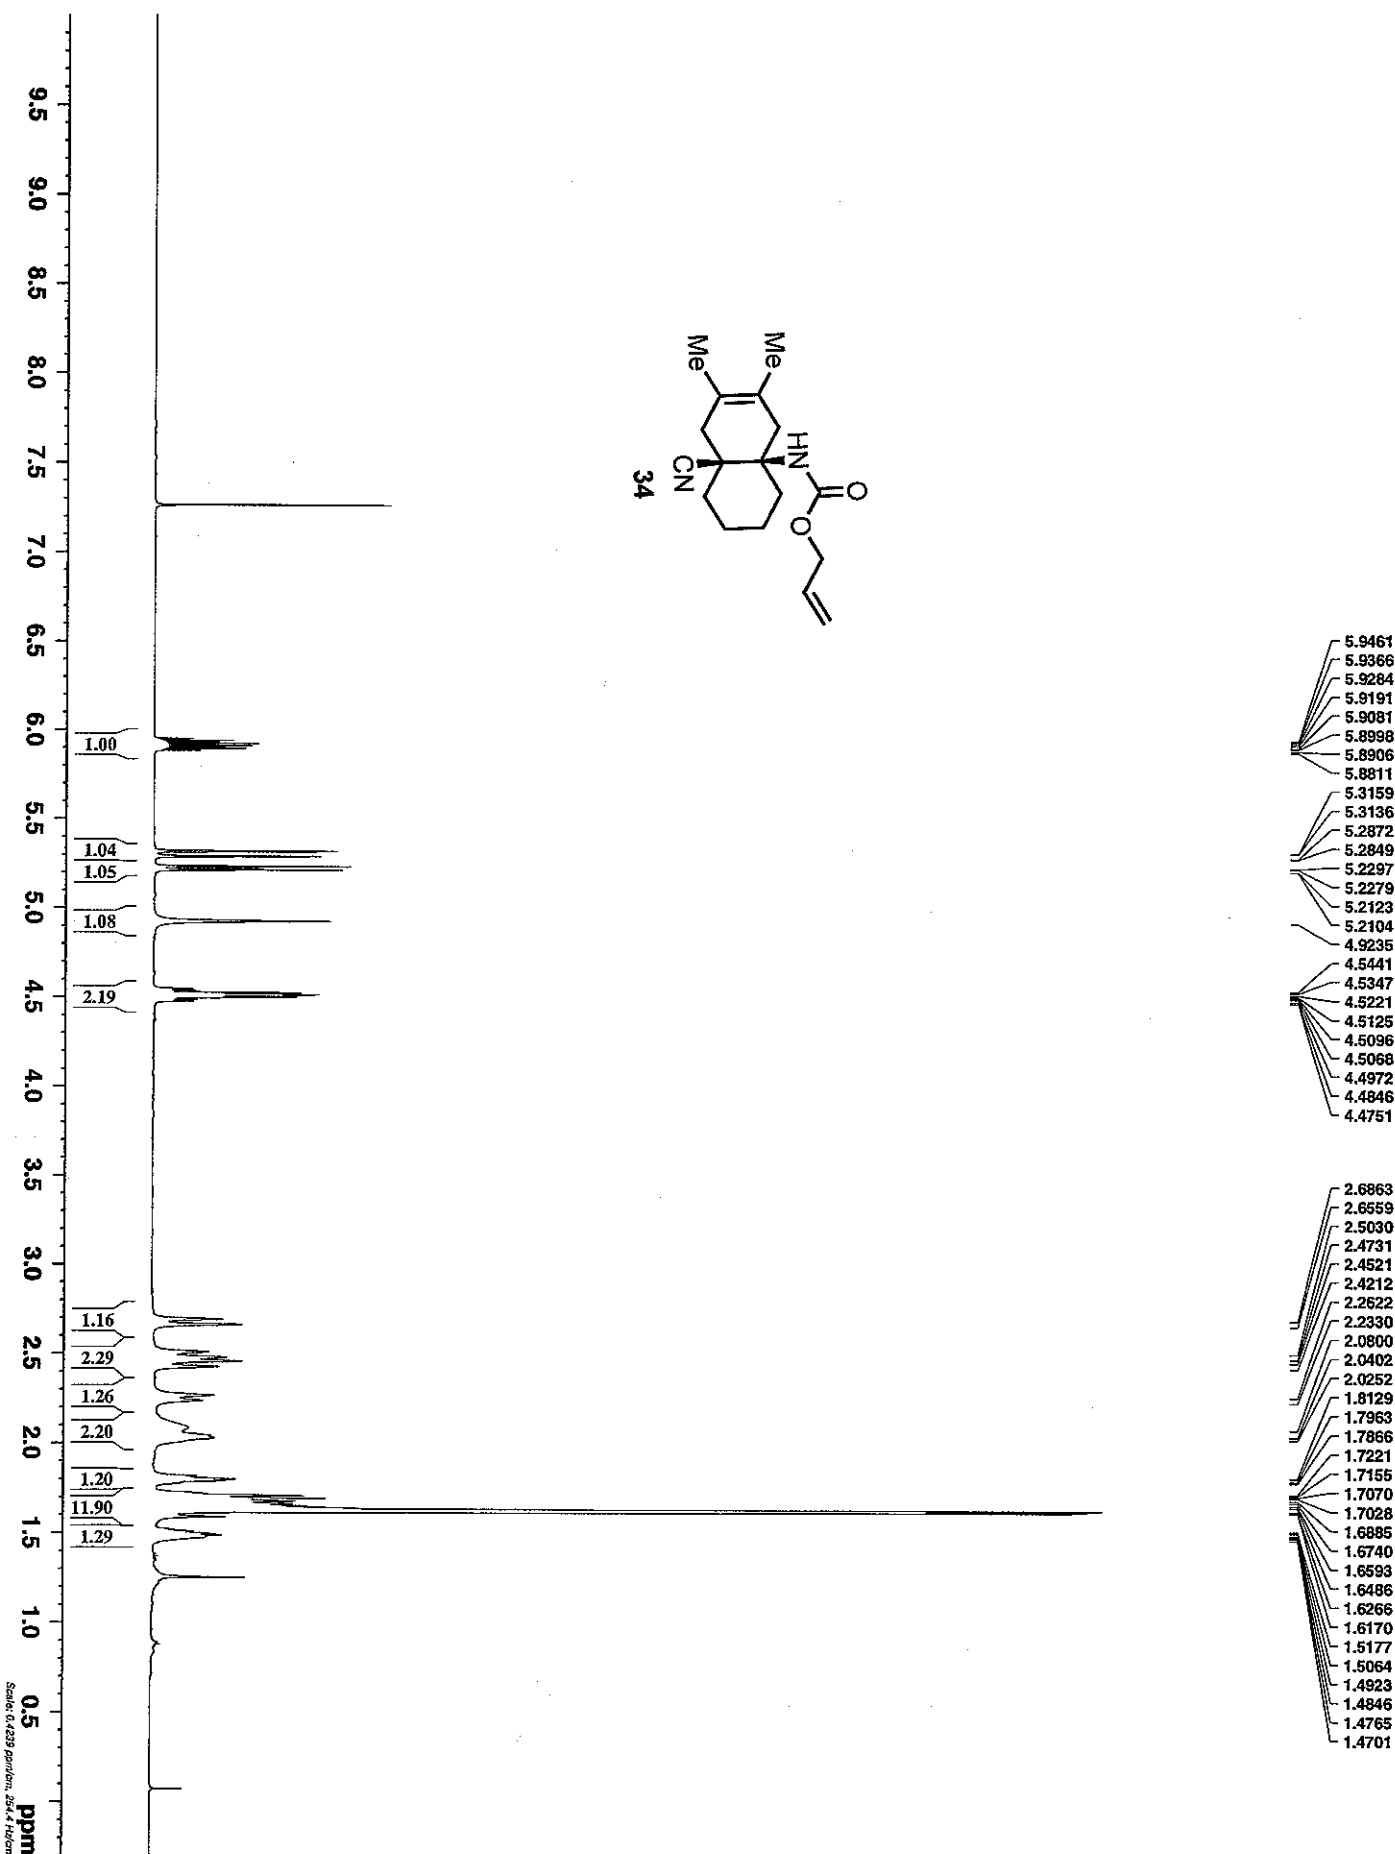

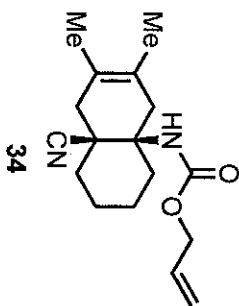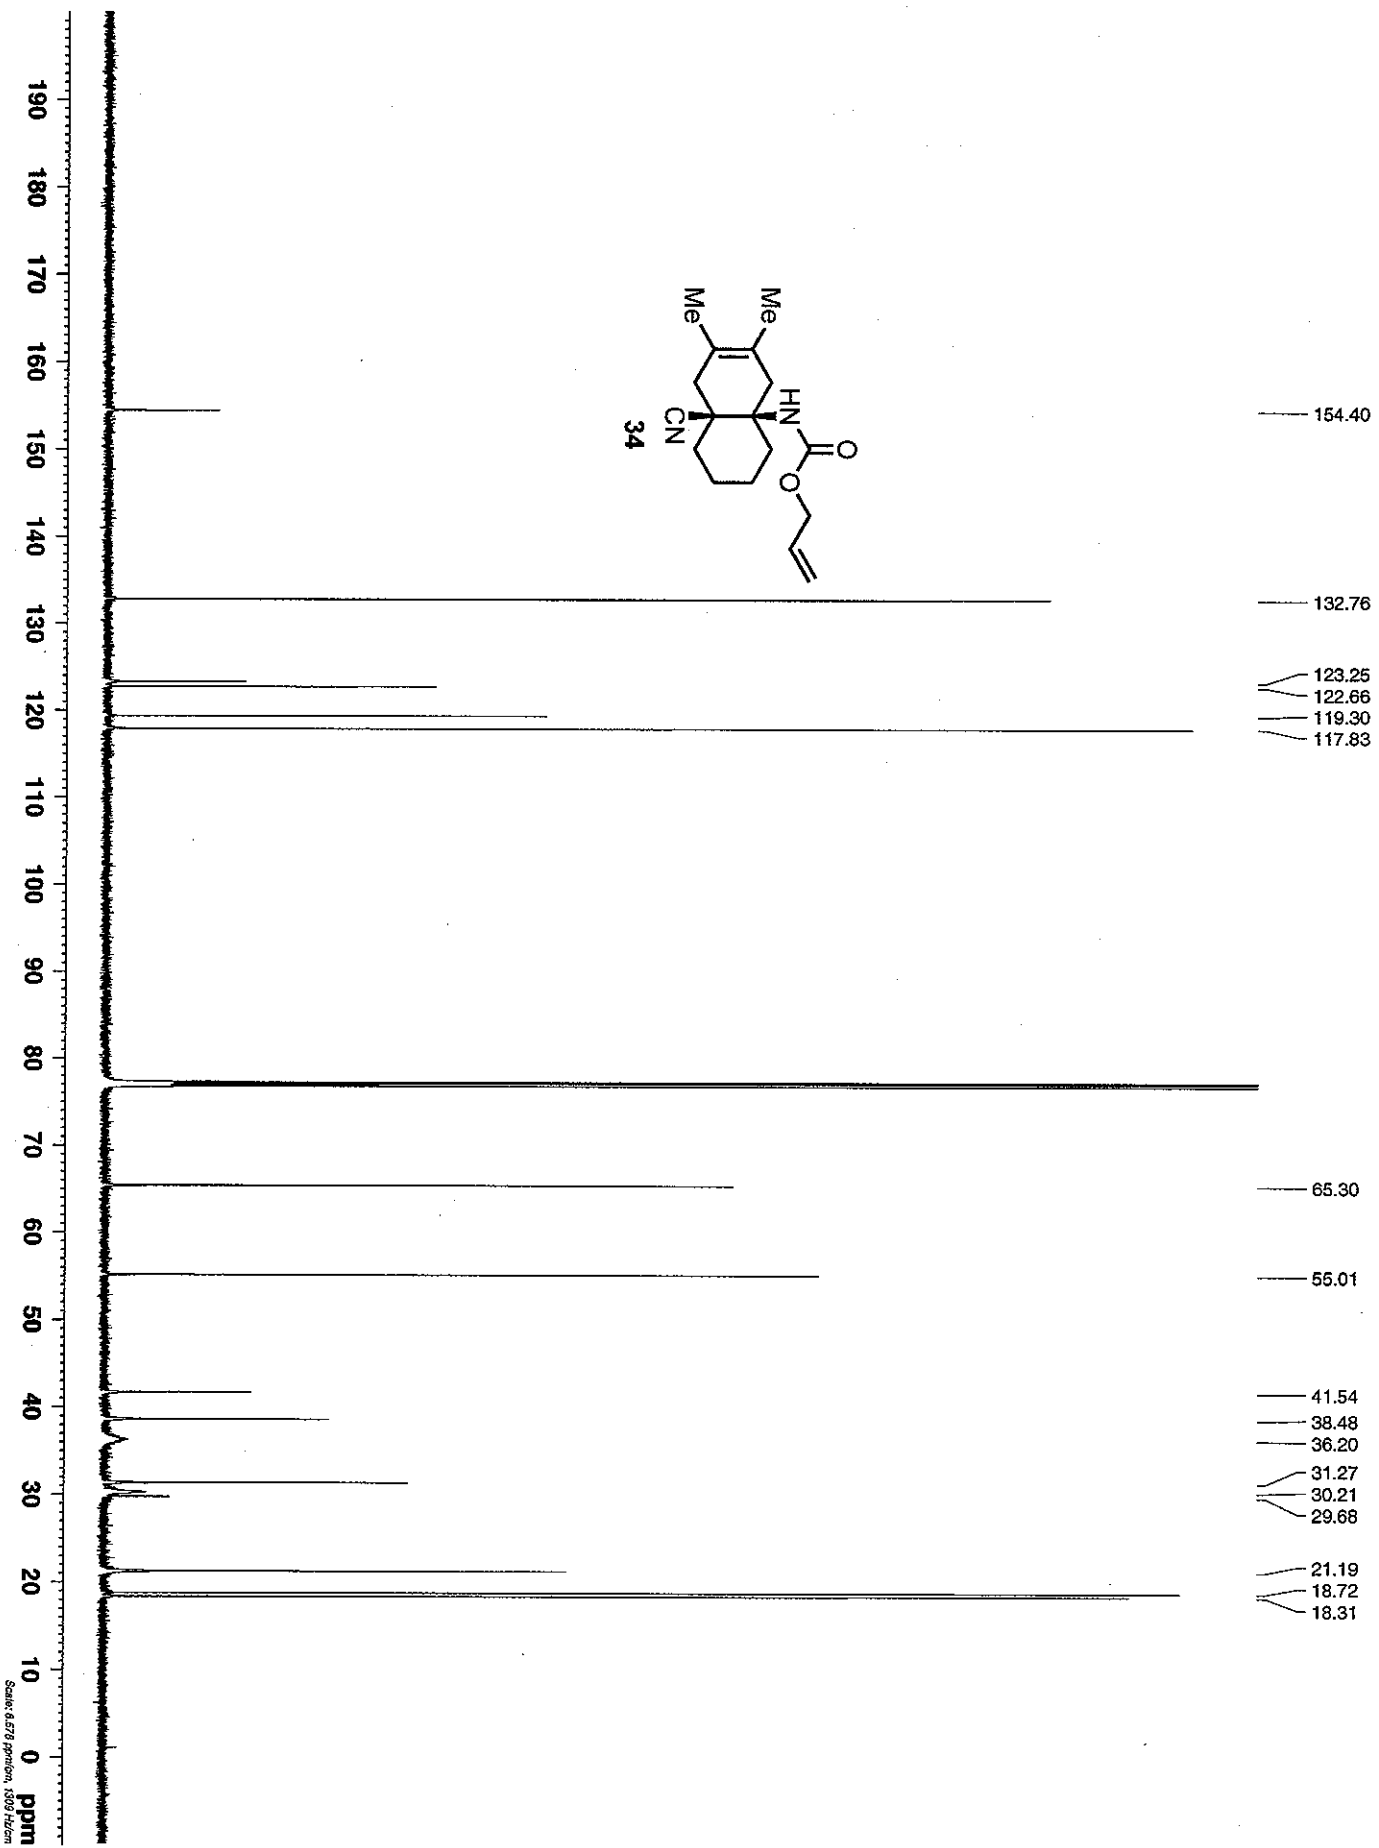

\* Kimw12 AS1\_4\_249\_UPPER (10 1) CDC13 24.0C July\_16\_2009\_13:08:16 Bruker AVII+ 600MHz RRL1326: zg30 : 1H 7.500 ppm \*

- 5.9531
- 5.9436
- 5.9356
- 5.9342
- 5.9262
- 5.9150
- 5.9069
- 5.9056
- 5.8975
- 5.8880
- 5.3300
- 5.3276
- 5.3251
- 5.3227
- 5.3013
- 5.2989
- 5.2964
- 5.2940
- 5.2377
- 5.2356
- 5.2203
- 5.2182
- 5.0148
- 4.5428
- 4.5336
- 2.5023
- 2.4721
- 2.4588
- 2.4244
- 2.4098
- 2.3932
- 2.2478
- 2.2181
- 2.2079
- 2.2001
- 2.1908
- 2.1862
- 2.1834
- 2.1783
- 2.1697
- 2.1619
- 2.0510
- 2.0408
- 2.0348
- 2.0281
- 2.0248
- 2.0180
- 2.0122
- 2.0022
- 1.9852
- 1.9766
- 1.9691
- 1.9668
- 1.9639
- 1.9600
- 1.9553
- 1.9538
- 1.9500
- 1.9474
- 1.9447
- 1.9381
- 1.9334
- 1.9308
- 1.9281
- 1.9214
- 1.9114
- 1.8801
- 1.8707
- 1.8642
- 1.8585
- 1.8550
- 1.8497
- 1.8424

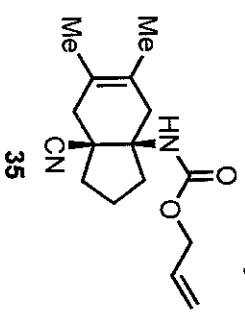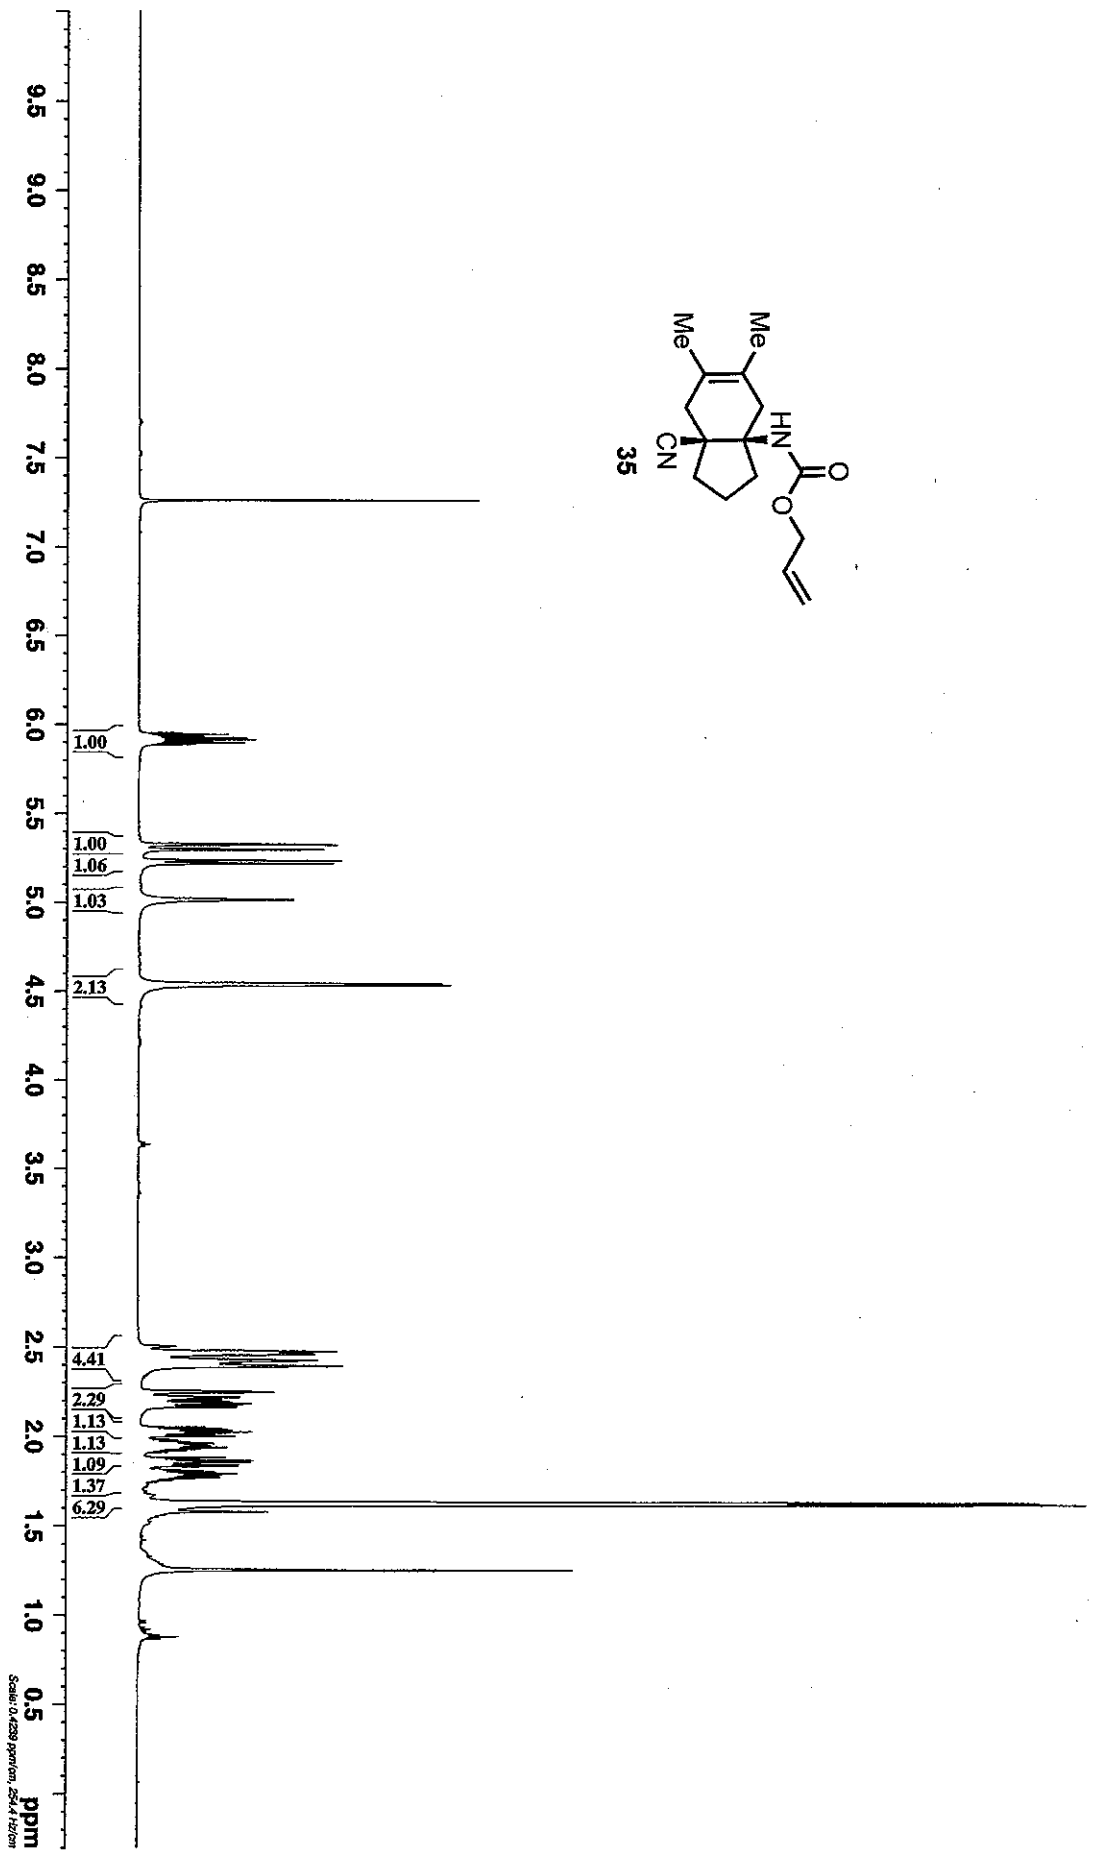

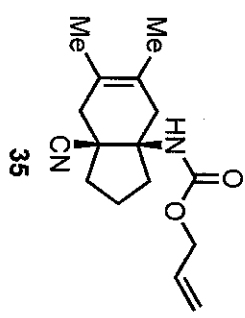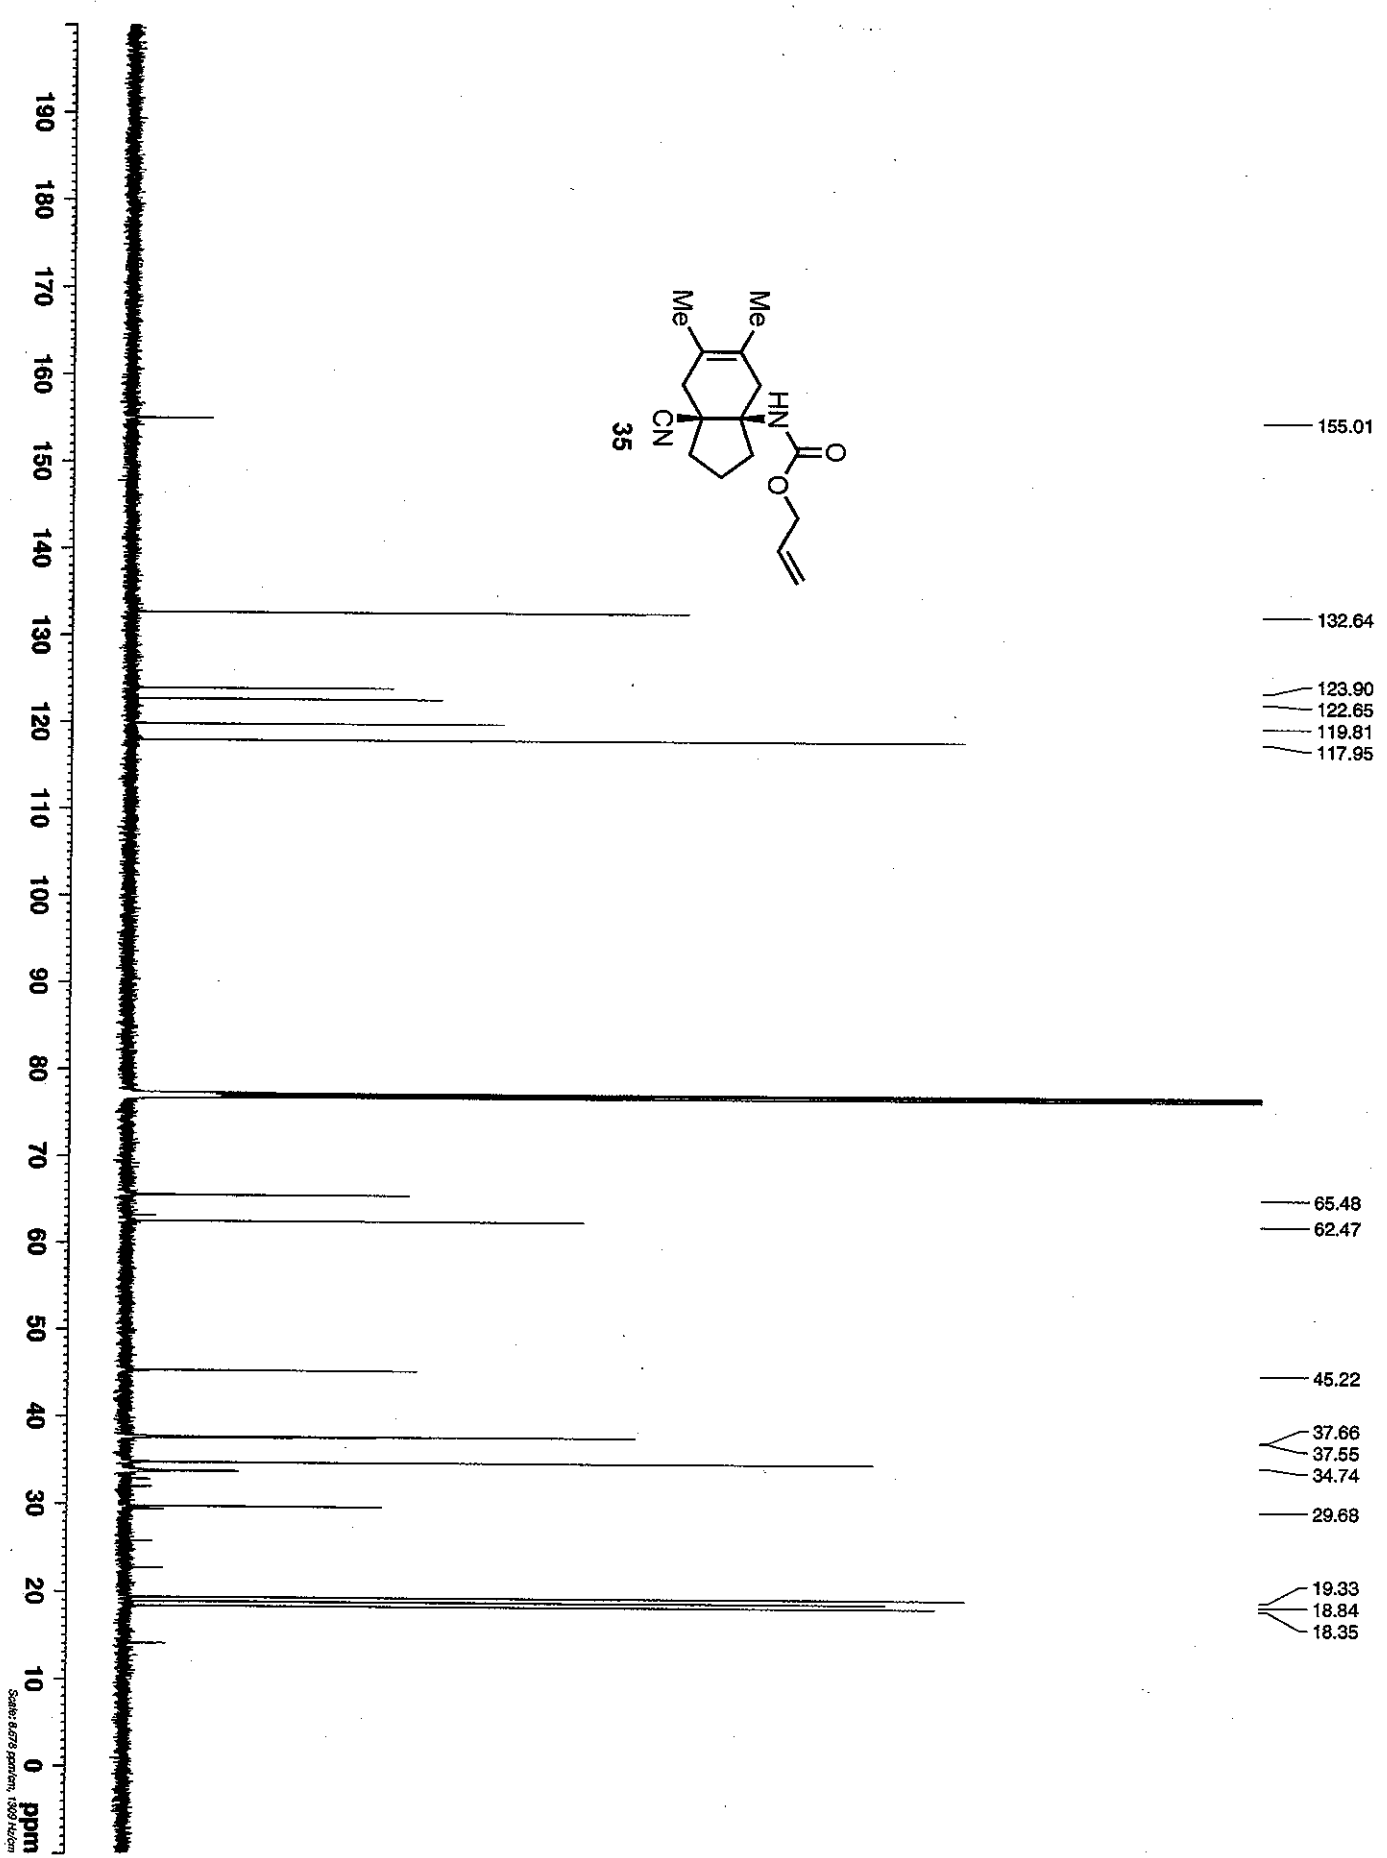

Scale: 0.075 ppm/cm, 1309 Hz/cm
